# Supplementary material for: Impact of anaemia on clinical outcome in patients with atrial fibrillation undergoing percutaneous coronary intervention: insights from the AFCAS registry
Source: PubMed Central journal article supplement — BMJ Open. 2014 May 13;4(5):e004700. doi: 10.1136/bmjopen-2013-004700 (PMC4025460; doi:10.1136/bmjopen-2013-004700), 2014-05-13
Supplement: bmjopen-2013-004700.draft_revisions.pdf [file bmjopen-2013-004700.draft_revisions.pdf]

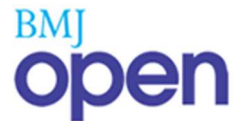

**Impact of anemia on clinical outcome in patients with atrial fibrillation undergoing percutaneous coronary intervention: insights from the AFCAS registry**

|                                 |                                                                                                                                                                                                                                                                                                                                                                                                                                                                                                                                                                                                                                                                                             |
|---------------------------------|---------------------------------------------------------------------------------------------------------------------------------------------------------------------------------------------------------------------------------------------------------------------------------------------------------------------------------------------------------------------------------------------------------------------------------------------------------------------------------------------------------------------------------------------------------------------------------------------------------------------------------------------------------------------------------------------|
| Journal:                        | <i>BMJ Open</i>                                                                                                                                                                                                                                                                                                                                                                                                                                                                                                                                                                                                                                                                             |
| Manuscript ID:                  | bmjopen-2013-004700                                                                                                                                                                                                                                                                                                                                                                                                                                                                                                                                                                                                                                                                         |
| Article Type:                   | Research                                                                                                                                                                                                                                                                                                                                                                                                                                                                                                                                                                                                                                                                                    |
| Date Submitted by the Author:   | 16-Dec-2013                                                                                                                                                                                                                                                                                                                                                                                                                                                                                                                                                                                                                                                                                 |
| Complete List of Authors:       | Puurunen, Marja; Finnish Red Cross Blood Service, Laboratory of Hemostasis<br>Kiviniemi, Tuomas; Turku University Hospital, Heart Center<br>Nammass, Wail; Turku University Hospital, Heart Center<br>Schlitt, Axel; Martin Luther University Halle-Wittenberg, Medical Faculty<br>Rubboli, Andrea; Ospedale Maggiore, Division of Cardiology<br>Nyman, Kai; Central Finland Central Hospital, Department of Cardiology<br>Karjalainen, Pasi; Satakunta Central Hospital, Heart Center<br>Kirchhof, Paulus; University of Birmingham, Centre for Cardiovascular Sciences<br>Lip, Gregory; University Department of Medicine,<br>Airaksinen, Juhani; Turku University Hospital, Heart Center |
| <b>Primary Subject Heading</b>: | Cardiovascular medicine                                                                                                                                                                                                                                                                                                                                                                                                                                                                                                                                                                                                                                                                     |
| Secondary Subject Heading:      | Haematology (incl blood transfusion)                                                                                                                                                                                                                                                                                                                                                                                                                                                                                                                                                                                                                                                        |
| Keywords:                       | HAEMATOLOGY, CARDIOLOGY, Coronary intervention < CARDIOLOGY, Anaemia < HAEMATOLOGY, Anticoagulation < HAEMATOLOGY                                                                                                                                                                                                                                                                                                                                                                                                                                                                                                                                                                           |
|                                 |                                                                                                                                                                                                                                                                                                                                                                                                                                                                                                                                                                                                                                                                                             |

1  
2  
3  
4 **Impact of anemia on clinical outcome in patients with atrial fibrillation**  
5  
6 **undergoing percutaneous coronary intervention: insights from the AFCAS**  
7  
8 **registry**  
9  
10

11  
12  
13  
14 **Puurunen Marja\***, **Kiviniemi Tuomas†**, **Nammas Wail†**, **Schlitt Axel ‡**, **Rubboli**  
15 **Andrea§**, **Nyman Kai#**, **Karjalainen Pasi¶**, **Kirchhof Paulus††,\*\***, **Lip Gregory YH††**,  
16  
17 **Airaksinen KE Juhani†**  
18  
19

20  
21 \* Hemostasis laboratory, Finnish Red Cross Blood Service, Helsinki, Finland

22  
23 †Heart Center, Turku University Hospital and University of Turku, Turku, Finland;

24  
25 ‡Medical Faculty, Martin Luther University Halle-Wittenberg, Halle-Wittenberg, Germany;

26  
27 §Division of Cardiology, Laboratory of Interventional Cardiology, Ospedale Maggiore,  
28  
29 Bologna, Italy;

30  
31 #Department of Cardiology, Central Finland Central Hospital, Jyväskylä, Finland;

32  
33 ¶Heart Center, Satakunta Central Hospital, Pori, Finland;

34  
35 \*\* Department of Cardiovascular Medicine, Hospital of the University of Münster, Münster,  
36  
37 Germany

38  
39 ††University of Birmingham Centre for Cardiovascular Sciences, City Hospital, Birmingham,  
40  
41 United Kingdom

42  
43 **Address for correspondence:** Dr. K. E. Juhani Airaksinen, Heart Center, Turku University  
44  
45 Hospital, Kiinamylynkatu 4-8, FIN-20520 Turku, Finland.

46  
47 Email: juhani.airaksinen@tyks.fi

48  
49 **Word count** (excluding title page, abstract, tables, figures and references) 2380  
50  
51

## ABSTRACT

**Background:** Anemia has an adverse impact on the outcome of patients with percutaneous coronary intervention (PCI). The aim of this study was to analyze the impact of anemia on the 12-month clinical outcome of patients with atrial fibrillation (AF) undergoing PCI and therefore requiring intense antithrombotic treatment.

**Methods:** Data from the prospective, multicenter AFCAS (Atrial Fibrillation undergoing Coronary Artery Stenting) registry with AF patients undergoing PCI was analyzed. Anemia was defined as a hemoglobin concentration of <12 g/dl for women, and <13 g/dl for men. The primary endpoint was occurrence of major adverse cardiac and cerebrovascular events (MACCE) or bleeding events.

**Results:** A total of 861/929 (92.7%) patients had available preprocedural hemoglobin concentration, of whom 258 (30%) had anemia. Anemic patients were older, had more often diabetes, higher CHA<sub>2</sub>DS<sub>2</sub>-VASc score, prior history of heart failure, chronic renal impairment, and acute coronary syndrome. Anemic patients had more MACCE than non-anemic (29.1% versus 19.4%, respectively,  $p=0.002$ ), and minor bleeding events (7.0% versus 3.3%, respectively,  $p=0.028$ ), with a trend toward more total bleeding events (25.2% versus 21.7%, respectively,  $p=0.059$ ). No difference was observed in antithrombotic regimens at discharge. In multivariate analysis anemia was an

1  
2  
3 independent predictor of all-cause mortality at 12-months follow-up (HR 1.62,  
4  
5 95% CI 1.05 – 2.51, p=0.029).  
6  
7

8 **Conclusions:** Anemia was a frequent finding in patients with AF referred for  
9  
10  
11  
12  
13  
14  
15  
16  
17  
18  
19  
20  
21  
22  
23  
24  
25  
26  
27  
28  
29  
30  
31  
32  
33  
34  
35  
36  
37  
38  
39  
40  
41  
42  
43  
44  
45  
46  
47  
48  
49  
50  
51  
52  
53  
54  
55  
56  
57  
58  
59  
60  
**Conclusions:** Anemia was a frequent finding in patients with AF referred for  
PCI. Anemic patients had a higher all-cause mortality, more thrombotic events,  
and minor bleeding events. Anemia seems to identify patients at risk for  
cardiovascular events and death.

**Keywords:** atrial fibrillation, percutaneous coronary intervention, anemia

**Strengths and limitations of the study:**

- The strength of the study is the enrolment of consecutive patients with the only exclusion criteria being unwillingness/inability to participate in the study. In this sense the study population represents well real-world patients with AF referred for PCI.
- The study adds to our knowledge on the prevalence and impact of anemia in AF patients undergoing PCI and thus requiring combination antithrombotic medication. It shows that anemia is a frequent finding and that even mild anemia has an adverse impact on outcome.
- The current study has the inherent limitations of the observational study design, including individual risk-based decision making in treatment choices, which may introduce selection bias. Another possible

1  
2  
3 confounder is the heterogeneity of the AF population among the  
4  
5 participating centers and some differences in the periprocedural routines.  
6  
7

- 8  
9 - The aetiology of anemia could not be systematically investigated and is  
10  
11 therefore out of the scope of this study.  
12  
13

14  
15  
16  
17  
18  
19  
20  
21  
22  
23  
24  
25  
26  
27  
28  
29  
30  
31  
32  
33  
34  
35  
36  
37  
38  
39  
40  
41  
42  
43  
44  
45  
46  
47  
48  
49  
50  
51  
52  
53  
54  
55  
56  
57  
58  
59  
60

For peer review only

## INTRODUCTION

It is estimated that around 5% of patients undergoing percutaneous coronary intervention (PCI) need long-term oral anticoagulation (OAC) due to atrial fibrillation (AF).[1,2] Yet, the current recommendations on the management of antithrombotic treatment in patients with AF undergoing PCI and stenting are mainly derived from small studies, amounting to a weak level of evidence.[3,4] Moreover, the real-world management of patients on OAC undergoing PCI is variable, and only partially adherent to the current recommendations.[5]

Defined according to the World Health Organization (WHO), anemia has been reported to affect nearly 25% of patients undergoing PCI and stenting. Anemic patients undergoing PCI are generally older with more comorbidities, and have higher rates of in-hospital mortality and major adverse cardiac and cerebrovascular events (MACCE), as well as 1-year mortality.[6,7] Furthermore, low admission hemoglobin level was found to be an independent predictor of in-hospital and long-term mortality, and was associated with higher rates of in-hospital minor and major bleeding events in patients undergoing primary PCI for ST-segment elevation myocardial infarction (MI).[8,9]

However, little is known about the effect of anemia on the outcome of patients with AF undergoing PCI and thus requiring intensive antithrombotic treatment. This population is at high bleeding risk, which could be aggravated by the underlying anemia and its cause. Therefore, we analyzed data from the

1  
2  
3 prospective AFCAS (Atrial Fibrillation undergoing Coronary Artery Stenting)  
4  
5  
6 registry to explore the impact of anemia on the 12-month clinical outcome of  
7  
8 patients with AF undergoing PCI.[10]  
9

## 10 11 12 13 **METHODS**

### 14 15 **Patients**

16  
17 The AFCAS registry (ClinicalTrials.gov number NCT00596570)  
18  
19 is a prospective, multicenter registry that enrolled patients with AF referred for  
20  
21 PCI in 5 European countries. The study design has been described in detail  
22  
23 previously.[11] Patients were enrolled if they had: 1) history of AF  
24  
25 (paroxysmal, persistent, or permanent), or 2) on-going AF during the index  
26  
27 PCI. Out of the 929 participants 861 (92.7%) had a preprocedural haemoglobin  
28  
29 count available and were included in this analysis.  
30  
31  
32  
33  
34  
35  
36  
37  
38  
39

40  
41 Coronary angiography and PCI were performed via either radial or femoral  
42  
43 access, and hemostasis was achieved according to local practice. Coronary  
44  
45 lesions were treated according to contemporary interventional techniques. Low-  
46  
47 molecular-weight heparin (enoxaparin sodium, dalteparin), unfractionated  
48  
49 heparin, bivalirudin, and glycoprotein IIb/IIIa inhibitors were administered at  
50  
51 the operator's discretion. The post-discharge medication was completely at the  
52  
53 discretion of the treating physician.  
54  
55  
56  
57  
58  
59  
60

1  
2  
3  
4  
5  
6 The primary endpoints of the current study were 1) occurrence of MACCE  
7  
8 defined as a composite of all-cause mortality, any non-fatal MI, any  
9  
10 revascularization, definite/probable stent thrombosis, transient ischemic attack  
11  
12 (TIA) or stroke, and peripheral arterial embolism; 2) bleeding events; and 3)  
13  
14 total adverse events (a composite of MACCE plus bleeding events). Bleeding  
15  
16 events were defined according to the Bleeding Academic Research Consortium  
17  
18 (BARC) criteria as minor (BARC 2), and major (BARC 3a, 3b, 3c and 5)  
19  
20 bleeding events; however, CABG-related bleeding was excluded.[12] (Online  
21  
22 Table 1)  
23  
24  
25  
26  
27  
28  
29  
30  
31

32 Anemia was defined as a hemoglobin concentration of <12 g/dl for women, and  
33  
34 <13 g/dl for men, according to the definition of the WHO.[13] Chronic renal  
35  
36 impairment was defined by an estimated glomerular filtration rate below 60  
37  
38 ml/min.  
39  
40  
41  
42  
43  
44

### 45 **Ethical aspects**

46  
47  
48 The study was initiated by the investigators and conducted according to the  
49  
50 ethical guidelines of the 1964 Declaration of Helsinki, as revised in 2002.  
51  
52  
53 Informed written consent was obtained from every patient after full explanation  
54  
55  
56  
57  
58  
59  
60



of the study protocol. The study protocol was approved by the ethics committees of the participating centers.

### Statistical analysis

For analysis patients with available preprocedural measurement of hemoglobin concentration were divided into two subgroups: anemic patients, and control patients without anemia. Continuous variables were reported as the mean  $\pm$  standard deviation if normally distributed, and as median [inter-quartile range (IQR)] if they were skewed. Data were tested for normal distribution using the Kolmogorov-Smirnov and Shapiro-Wilk tests. Categorical variables were described with absolute and relative (percentage) frequencies. Comparisons between the two study subgroups were performed using the unpaired *t*-test or Mann-Whitney test for continuous variables, and Pearson  $\chi^2$  or Fisher's exact test for categorical variables, as appropriate. Cox regression hazard model was used to identify the independent predictors of MACCE, and all-cause mortality at 12-month follow-up. Variables strongly correlated with the dependent variable by univariate analyses were entered in the model as covariates. Likewise, Cox regression hazard model was used to identify the independent predictors of MACCE, and all-cause mortality at 12-month follow-up in the subgroup of anemic patients. Finally we constructed Kaplan-Meier survival curves to display the time-to-event relationship for the occurrence of all-cause

1  
2  
3 mortality, MACCE, and all bleeding events. Statistical analysis was performed  
4  
5 using SPSS statistical software (SPSS v. 16.0.1, SPSS Inc., Chicago, Ill., USA).  
6  
7  
8  
9

## 10 **RESULTS**

### 11 **Baseline characteristics**

12  
13  
14  
15  
16 Out of 929 patients enrolled in the AFCAS registry and followed up for 12  
17  
18 months, 861 (92.7%) had available preprocedural measurement of hemoglobin  
19  
20 concentration, of whom 258 (30%) had anemia and 603 (70%) had normal  
21  
22 hemoglobin concentration. Anemic patients were older, more likely to have  
23  
24 diabetes mellitus, hypertension, history of heart failure and chronic renal  
25  
26 impairment, HAS-BLED score  $\geq 3$ , higher CHA<sub>2</sub>DS<sub>2</sub>VASC score, and more  
27  
28 likely presented with acute coronary syndrome (ACS) as opposed to chronic  
29  
30 stable angina, compared with those without anemia ( $p < 0.05$  for all), as shown  
31  
32 in Table 1. Furthermore, anemic patients had more vessels treated during the  
33  
34 index procedure, and a greater total stent length, compared with those without  
35  
36 anemia ( $p < 0.05$  for both) (Table 2). At discharge, no significant differences  
37  
38 were seen in the prescription of antithrombotic medications in the two study  
39  
40 groups ( $p = 0.15$ ) (Table 3). The duration of clopidogrel treatment did not differ  
41  
42 in anemic versus non-anemic patients on triple therapy (median [IQR]: 3 [11]  
43  
44 versus 3 [5] months,  $p = 0.61$ ), on dual antiplatelet therapy (median [IQR]: 12  
45  
46 [11] versus 12 [11] months,  $p = 0.72$ ), or on vitamin K antagonist + clopidogrel  
47  
48  
49  
50  
51  
52  
53  
54  
55  
56  
57  
58  
59  
60

(median [IQR]: 12 [11] versus 3 [11] months,  $p=0.65$ ). Proton pump inhibitors were more frequently prescribed to patients with anemia versus those without (47.7 versus 31.3%, respectively,  $p < 0.001$ ).

**Table 1** Baseline clinical characteristics of the two study subgroups

| Variable                                        | Anemia (N=258) | Non-anemic (N=603) | <i>p</i> value |
|-------------------------------------------------|----------------|--------------------|----------------|
| Age (yrs)                                       | 76 [9]         | 73 [11]            | <0.001         |
| Female gender                                   | 89 (34.5)      | 170 (28.2)         | 0.074          |
| Diabetes mellitus                               | 119 (46.1)     | 191 (31.7)         | <0.001         |
| Hypercholesterolemia                            | 162 (62.8)     | 407 (67.5)         | 0.183          |
| Current or ex-smoking                           | 26 (10.1)      | 62 (10.3)          | 1.00           |
| Hypertension                                    | 221 (85.7)     | 503 (83.4)         | 0.48           |
| Paroxysmal atrial fibrillation                  | 103 (39.9)     | 229 (38.0)         | 0.594          |
| Persistent atrial fibrillation                  | 22 (8.5)       | 78 (12.9)          | 0.081          |
| Permanent atrial fibrillation                   | 129 (50)       | 294 (48.8)         | 0.766          |
| CHA <sub>2</sub> DS <sub>2</sub> -VASc score >4 | 148 (57.4)     | 235 (39.0)         | <0.001         |
| HAS BLED score $\geq 3$                         | 215 (83.3)     | 441 (73.1)         | 0.001          |
| History of peptic ulcer                         | 17 (6.6)       | 27 (4.5)           | 0.236          |

|                                  |            |            |        |
|----------------------------------|------------|------------|--------|
| History of cerebral hemorrhage   | 4 (1.6)    | 6 (1.0)    | 0.497  |
| History of GI hemorrhage         | 9 (3.5)    | 12 (2.0)   | 0.144  |
| History of heart failure         | 69 (26.7)  | 113 (18.7) | 0.011  |
| eGFR below 60 ml/min             | 119 (52.2) | 175 (31.9) | <0.001 |
| Prior transient ischemic attacks | 12 (4.7)   | 30 (5.0)   | 1.00   |
| Prior stroke                     | 36 (14.0)  | 67 (11.1)  | 0.252  |
| Prior MI                         | 76 (29.5)  | 146 (24.2) | 0.126  |
| Prior PCI                        | 47 (18.2)  | 100 (16.6) | 0.555  |
| Prior coronary bypass surgery    | 47 (18.2)  | 78 (12.9)  | 0.057  |
| Proton pump inhibitors           | 123 (47.7) | 189 (31.3) | <0.001 |
| Stable angina pectoris           | 81 (31.4)  | 289 (48.0) | <0.001 |
| ACS                              | 177 (68.6) | 313 (52.0) | <0.001 |
| Unstable angina pectoris         | 53 (20.5)  | 107 (17.7) | 0.34   |
| Non-ST-elevation MI              | 83 (32.2)  | 132 (21.9) | 0.002  |
| ST-elevation MI                  | 41 (15.9)  | 74 (12.3)  | 0.156  |

Continuous variables are presented as median [interquartile range], whereas categorical variables are presented as frequency (percentage).

ACS indicates acute coronary syndrome; eGFR, estimated glomerular filtration rate; GI, gastrointestinal, IQR, inter-quartile range; MI, myocardial infarction; PCI, percutaneous coronary intervention.

**Table 2** Procedural data of the two study subgroups

| Variable                                | Anemia<br>(N=258) | Non-anemic<br>(N=603) | <i>p</i> value |
|-----------------------------------------|-------------------|-----------------------|----------------|
| Femoral access                          | 196 (76.0)        | 435 (72.1)            | 0.275          |
| Number of treated vessels               | 1.22 ± 0.45       | 1.15 ± 0.41           | 0.04           |
| DES                                     | 67 (27.0)         | 138 (23.6)            | 0.293          |
| Peri-procedural INR                     | 1.9 [1]           | 1.88 [1]              | 0.509          |
| Stent diameter (mm)                     | 3 [1]             | 3 [1]                 | 0.965          |
| Total stent length (mm)                 | 20 [18]           | 19 [14]               | 0.014          |
| Procedural success                      | 252 (97.7)        | 582 (96.5)            | 0.085          |
| Hemostasis                              |                   |                       |                |
| Manual compression                      | 112 (43.4)        | 249 (41.3)            | 0.765          |
| Compression device <sup>a</sup>         | 49 (19.0)         | 155 (25.7)            | 0.083          |
| Access-site closure device <sup>b</sup> | 82 (31.8)         | 165 (27.4)            | 0.154          |

Continuous variables are presented as mean ± SD or median [interquartile range], whereas categorical variables are presented as frequency (percentage).

<sup>a</sup>FemoStop<sup>®</sup>, pneumatic compression device (Radi medical system, Sweden).

<sup>b</sup>Angioseal<sup>®</sup>, closure device (St. Jude medical, USA).

POBA indicates plain only balloon angioplasty, DES, drug-eluting stents; INR, international normalized ratio; IQR, inter-quartile range.

**Table 3** Prescription of antithrombotic medications at discharge in the two study subgroups

| Variable             | Anemia (N=258) | Non-anemic (N=603) | <i>p</i> value |
|----------------------|----------------|--------------------|----------------|
| Triple therapy       | 181 (70.2)     | 442 (73.3)         | 0.15           |
| DAPT                 | 58 (22.5)      | 100 (16.6)         |                |
| VKA plus clopidogrel | 15 (5.8)       | 51 (8.5)           |                |
| VKA plus aspirin     | 4 (1.6)        | 10 (1.7)           |                |

Variables are presented as frequency (percentage).

\*The number of patients available for follow-up of the duration of aspirin, clopidogrel, VKA was 258, 257, 159 in the group of anemia, and 600, 600, 402 in the control group, respectively.

VKA indicates vitamin K antagonist; DAPT, dual antiplatelet therapy.

### Clinical outcome

Clinical outcomes at 12-month follow-up are presented in table 4 and figure 1.

The primary endpoint of MACCE was significantly more frequent in anemic patients than those without anemia (29.1 versus 19.4%, respectively,  $p=0.002$ ).

This difference was driven by higher rates of all-cause mortality, non-fatal MI, and definite/probable ST ( $p<0.05$  for all). Anemic patients had more BARC 3a bleeding events (7.0 versus 3.3%, respectively,  $p=0.028$ ). No difference was seen in BARC 5 bleedings. There was a trend toward more total bleeding

events (25.2% in anemic versus 21.7% in controls,  $p=0.059$ ). Total adverse events occurred more frequently in anemic versus non-anemic patients (43.0 versus 31.5%, respectively,  $p=0.001$ ).

**Table 4** Clinical outcome at 12-month follow-up in the two study subgroups

| <b>Endpoints</b>                    | <b>Anemia<br/>(N=258)</b> | <b>Non-anemic<br/>(N=603)</b> | <b><i>p</i> value</b> |
|-------------------------------------|---------------------------|-------------------------------|-----------------------|
| MACCE                               | 75 (29.1)                 | 117 (19.4)                    | 0.002                 |
| All-cause mortality                 | 48 (18.6)                 | 50 (8.3)                      | <0.001                |
| Stroke/TIA                          | 6 (2.3)                   | 17 (2.8)                      | 0.819                 |
| Peripheral arterial embolism        | 2 (0.8)                   | 5 (0.8)                       | 1.00                  |
| Non-fatal myocardial infarction     | 24 (9.3)                  | 27 (4.5)                      | 0.011                 |
| Any revascularization               | 19 (7.4)                  | 51 (8.5)                      | 0.683                 |
| Definite/probable stent thrombosis  | 10 (3.9)                  | 4 (0.7)                       | 0.002                 |
| Total bleeding events               | 65 (25.2)                 | 131 (21.7)                    | 0.059                 |
| Minor bleeding (BARC 2)             | 22 (8.5)                  | 48 (8.0)                      | 0.786                 |
| Major bleeding (BARC 3a, 3b, 3c, 5) | 33 (12.8)                 | 56 (9.3)                      | 0.142                 |
| Total adverse events                | 111 (43.0)                | 190 (31.5)                    | 0.001                 |

Variables are presented as frequency (percentage).

MACCE indicates major adverse cardiac and cerebrovascular events; TIA, transient ischemic attacks; BARC, Bleeding Academic Research Consortium.

1  
2  
3 The incidence of definite/probable stent thrombosis was significantly higher in  
4  
5 anemic versus non-anemic patients (3.9 versus 0.7%, respectively,  $p=0.002$ ).

6  
7  
8 Patients who developed stent thrombosis more often presented with ACS than  
9  
10 those who did not (80.0 versus 56.6%, respectively,  $p=0.07$ ); however, the use  
11  
12 of triple therapy did not differ statistically between groups (60.0 versus 73.3%,  
13  
14 respectively,  $p=0.25$ ).

15  
16  
17  
18  
19  
20  
21 In univariate analysis age above 75, diabetes, congestive heart failure, anemia,  
22  
23 chronic renal impairment, ACS at presentation, and total stent length were  
24  
25 strongly correlated with both MACCE and all-cause mortality at 12-month  
26  
27 follow-up. In the Cox regression model independent predictors of all-cause  
28  
29 mortality were anemia (HR 1.62, 95% CI 1.05 – 2.51,  $p=0.029$ ), ACS at  
30  
31 presentation (HR 2.26, 95% CI 1.37 – 3.75,  $p=0.001$ ), chronic renal impairment  
32  
33 (HR 2.35, 95% CI 1.52 – 3.65,  $p<0.001$ ), and diabetes (HR 1.76, 95% CI 1.15 –  
34  
35 2.70,  $p=0.009$ ). In contrast, anemia was not an independent predictor of  
36  
37 MACCE at 12-months follow-up unlike age above 75 years (HR 1.7, 95%-CI  
38  
39 1.2-2.4,  $p=0.004$ ), diabetes (HR 1.7, 95%-CI 1.2-2.3,  $p=0.002$ ), ACS at  
40  
41 presentation (HR 1.7, 95%-CI 1.2-2.3,  $p=0.003$ ), and congestive heart failure  
42  
43 (HR 1.5, 95%-CI 1.0-2.1,  $p=0.03$ ).

44  
45  
46  
47  
48  
49  
50  
51  
52  
53  
54  
55  
56  
57  
58  
59  
60  
When the anemic patients were analysed separately in the Cox  
regression model, age over 75 years and ACS at presentation were identified as



1  
2  
3 independent predictors of MACCE at 12-months; and chronic renal  
4  
5  
6 impairment, age over 75 years and ACS at presentation as independent  
7  
8  
9 predictors of all-cause mortality

10  
11 Among 861 patients with available preprocedural measurement of  
12  
13 haemoglobin concentration, 26 (2.8%) had severe anemia (defined as  
14  
15 haemoglobin below 10 g/dl). In this subgroup, MACCE occurred in 12 (46.2%)  
16  
17 patients, 10 (38.5%) patients died, and 8 (30.8%) experienced a BARC 2-5  
18  
19 bleeding episode. At discharge, triple therapy was prescribed in 18 (69.2%)  
20  
21 patients, dual anti-platelet therapy in 8 (30.8%), and no patient was prescribed  
22  
23 vitamin K antagonists plus a single anti-platelet drug. Proton pump inhibitors  
24  
25 were prescribed at discharge in 18 (69.2%) patients, and one (3.8%) patient had  
26  
27 a history of gastrointestinal bleeding.  
28  
29  
30  
31  
32  
33  
34  
35  
36

## 37 **DISCUSSION**

38  
39 Our study is the first report on the impact of anemia on the long-term clinical  
40  
41 outcome of patients with AF undergoing PCI. The AFCAS registry represent a  
42  
43 real-life cohort of high-risk AF-patients requiring PCI. The results of the  
44  
45 current study showing that 30% of the patients were anemic confirm the  
46  
47 previous reports that anemia is a frequent finding in real-world patients with  
48  
49 AF referred for PCI.[6-9,14] Anemic patients in the AFCAS registry were older  
50  
51  
52  
53  
54  
55  
56  
57  
58  
59  
60

1  
2  
3 with more comorbidities, and presented more often with ACS, compared with  
4  
5 non-anemic patients, as also reported in previous cohorts.[6,7,9,14].  
6  
7

8  
9  
10  
11 Overall, the 12-month clinical outcome was worse in anemic patients. Anemia  
12  
13 remained an independent predictor of all-cause mortality in multivariate  
14  
15 analysis. The higher rate of all-cause mortality might be related to the higher-  
16  
17 risk profile in anemic patients, as well as the underlying disease causing  
18  
19 anemia. Furthermore, anemic patients had more frequent MACCE at 12  
20  
21 months, primarily driven by higher rates of all-cause mortality, and non-fatal  
22  
23 MI. However, anemia was not an independent predictor of MACCE. The higher  
24  
25 rate of non-fatal MI might be explained, at least in part, by the higher frequency  
26  
27 of ACS at presentation in anemic patients.  
28  
29  
30  
31  
32  
33  
34  
35  
36

37 The estimated thromboembolic risk of anemic patients according to CHADS<sub>2</sub>  
38  
39 score was higher. However, no excess in TIA or stroke was seen during the  
40  
41 follow-up and only a trend towards more bleeding was observed. This is  
42  
43 contradictory to previous studies have reported a higher incidence of cardiac  
44  
45 and cerebrovascular thrombotic events at long-term follow-up in anemic versus  
46  
47 non-anemic patients in various patient cohorts referred for PCI.[7,9,14-18] The  
48  
49 relatively small number of complications in our patient cohort might explain  
50  
51 this difference.  
52  
53  
54  
55  
56  
57  
58  
59  
60

1  
2  
3  
4  
5  
6 The estimated bleeding risk according to the HAS-BLED score was higher in  
7  
8 anemic patients, but there was only a trend towards increased risk of major  
9  
10 bleeding. However, the results of the current study support the previous reports  
11  
12 on the increased bleeding risk associated with anemia in various patient groups  
13  
14 undergoing PCI.[8,9,19] Anemia may be a marker and consequence of an  
15  
16 underlying condition such as bleeding diathesis, occult gastrointestinal  
17  
18 bleeding, or malignancy that augments the bleeding risk. An interesting  
19  
20 observation is that neither the presence of anemia nor higher estimated bleeding  
21  
22 risk seemed to affect the clinician's choice of antithrombotic medications at  
23  
24 discharge. In view of our results, patients with anemia tolerated triple therapy  
25  
26 surprisingly well with only a trend towards increased bleeding.  
27  
28  
29  
30  
31  
32  
33  
34  
35  
36

37 We observed that the rate of definite or probable stent thrombosis was  
38  
39 significantly higher in anemic versus non-anemic patients ( $p = 0.002$ ). ACS at  
40  
41 presentation may have contributed to the higher rate of stent thrombosis in  
42  
43 anemic patients, as patients with anemia more often presented with ACS versus  
44  
45 those without anemia. Consistent with our results, Pilgrim and co-workers,  
46  
47 observed a higher rate of definite stent thrombosis at 4-year follow-up in  
48  
49 anemic patients who underwent PCI with unrestricted use of drug-eluting  
50  
51 stents, compared with non-anemic ones.[14] Interestingly, in a recent study,  
52  
53  
54  
55  
56  
57  
58  
59  
60

1  
2  
3 anemia was the only independent predictor of high residual platelet reactivity  
4  
5 on clopidogrel in a series of patients undergoing PCI.[20] These observations  
6  
7 warrant further studies to clarify the underlying mechanisms.  
8  
9

10  
11  
12  
13 The effect of anemia on the clinical outcome of PCI appears early during  
14 hospitalization. Kaplan-Meier event-free survival curves in the current study  
15 revealed that most of the thrombotic as well as bleeding events occurred early  
16 (within 30 days) following the index PCI (Figure 1). This finding is in line with  
17 previous reports.[6,8,9,15] In patients with coronary artery disease, anemia  
18 may aggravate myocardial ischemia, and unveil significant coronary  
19 obstruction. Low hemoglobin levels might compromise myocardial oxygen  
20 supply, particularly when it exceeds the autoregulatory capacity of coronary  
21 flow reserve. Cardiac output increases in patients with anemia in order to  
22 maintain adequate oxygen delivery to the tissues. This increases heart rate and  
23 induces myocardial hypertrophy, which in turn, increases myocardial oxygen  
24 demand, and further exaggerates the myocardial oxygen demand/supply  
25 imbalance.[21] On the other hand, patients with severe anemia receive more  
26 frequent blood transfusion, which was reported to have an adverse impact on  
27 survival after PCI.[22] Unfortunately, information on blood transfusions was  
28 not available in our registry. More importantly, anemia is frequently associated  
29 with severe underlying chronic diseases which may compromise long-term  
30  
31  
32  
33  
34  
35  
36  
37  
38  
39  
40  
41  
42  
43  
44  
45  
46  
47  
48  
49  
50  
51  
52  
53  
54  
55  
56  
57  
58  
59  
60

1  
2  
3 survival. Of note is a recent report suggesting that in patients who underwent  
4  
5  
6 PCI with drug-eluting stents, those in whom anemia improved at follow-up had  
7  
8  
9 less MACCE at a median follow-up of 25 months, compared with those with  
10  
11  
12 sustained anemia suggesting that a transient cause is less detrimental than a  
13  
14  
15 long-standing state causing anemia, e.g. malignancy.[16]  
16  
17  
18

### 19 **Limitations of the study**

20  
21 The current study has the inherent limitations of the observational study design,  
22  
23 including individual risk-based decision making in treatment choices, which  
24  
25  
26 may introduce selection bias, even though we did not observe any difference  
27  
28  
29 between the two study groups in the antithrombotic treatment prescribed at  
30  
31  
32 discharge. Another possible confounder is the heterogeneity of the AF  
33  
34  
35 population among the participating centers and some differences in the  
36  
37  
38 periprocedural routines. Moreover, the aetiology of anemia was not  
39  
40  
41 systematically investigated; yet, it is beyond the scope of the current study. The  
42  
43  
44 strength of the study is the enrolment of consecutive patients with the only  
45  
46  
47 exclusion criteria being unwillingness/inability to participate in the study. In  
48  
49  
50 this sense the study population represents well real-world patients with AF  
51  
52  
53 referred for PCI.  
54  
55  
56  
57  
58  
59  
60

## Conclusion

Anemia was a frequent finding in patients with AF referred for PCI. Anemic patients were older with more frequent comorbidities, and more often presented with ACS. Anemia seems to be an independent risk factor for all-cause mortality during 12-month follow-up. Anemia is also associated with more MACCE, and a trend toward a higher rate of bleeding.

## ACKNOWLEDGMENTS

We thank our study coordinator Tuija Vasankari, RN, for her valuable input in data management.

## COMPETING INTERESTS

The authors declare no competing interests.

## CONTRIBUTORSHIP STATEMENT

Marja Puurunen and Tuomas Kiviniemi participated in data collection and analysis and writing the manuscript; Wail Nammas contributed to data analysis and writing of the manuscript; Axel Schlitt, Andrea Rubboli, Kai Nyman, Pasi Karjalainen and Paulus Kirchhof contributed to data collection and critical revision of the manuscript; Gregory Lip contributed to study design, data collection and critical revision of the manuscript; Juhani Airaksinen acted as

1  
2  
3 the primary investigator of the AFCAS study and contributed to study design,  
4  
5 data collection, data analysis and writing of the manuscript.  
6  
7

## 8 **FUNDING**

9  
10  
11 This study was supported by grants from the Finnish Foundation for  
12  
13 Cardiovascular Research, Helsinki, Finland.  
14

15  
16  
17  
18 **Extra data** is available by emailing Prof. Juhani Airaksinen at [juhani.airaksinen@tyks.fi](mailto:juhani.airaksinen@tyks.fi).  
19  
20  
21  
22  
23  
24  
25  
26  
27  
28  
29  
30  
31  
32  
33  
34  
35  
36  
37  
38  
39  
40  
41  
42  
43  
44  
45  
46  
47  
48  
49  
50  
51  
52  
53  
54  
55  
56  
57  
58  
59  
60

**REFERENCES**

1. Rubboli A, Halperin JL, Airaksinen KE, et al. Antithrombotic therapy in patients treated with oral anticoagulation undergoing coronary artery stenting. An expert consensus document with focus on atrial fibrillation. *Ann Med* 2008;40(6):428-36.
2. Rubboli A, Colletta M, Valencia J, et al for the WARfarin, Coronary STENTing (WAR-STENT) Study Group. Periprocedural management and in-hospital outcome of patients with indication for oral anticoagulation undergoing coronary artery stenting. *J Interv Cardiol* 2009;22:390–397.
3. Lip GYH, Huber K, Andreotti F, et al. Antithrombotic management of atrial fibrillation patients presenting with acute coronary syndrome and/or undergoing coronary stenting: executive summary—a Consensus Document of the European Society of Cardiology Working Group on Thrombosis, endorsed by the European Heart Rhythm Association (EHRA) and the European Association of Percutaneous Cardiovascular Interventions (EAPCI). *Eur Heart J* 2010;31:1311-1318.
4. Faxon DP, Eikelboom JW, Berger PB, et al. Consensus Document: Antithrombotic therapy in patients with atrial fibrillation undergoing coronary stenting. A North-American perspective. *Thromb Haemost* 2011;106:522-84.



- 1  
2  
3 5. Rubboli A, Dewilde W, Huber K, et al. The management of patients on oral  
4  
5 anticoagulation undergoing coronary stent implantation: a survey among  
6  
7 interventional cardiologists from eight European countries. *J Interv Cardiol*  
8  
9 2012;25:163-9.  
10
- 11  
12  
13 6. McKechnie RS, Smith D, Montoye C, et al; Blue Cross Blue Shield of  
14  
15 Michigan Cardiovascular Consortium (BMC2). Prognostic implication of  
16  
17 anemia on in-hospital outcomes after percutaneous coronary intervention.  
18  
19 *Circulation* 2004;110(3):271-7.  
20  
21
- 22  
23  
24 7. Nikolsky E, Mehran R, Aymong ED, et al. Impact of anemia on outcomes of  
25  
26 patients undergoing percutaneous coronary interventions. *Am J Cardiol*  
27  
28 2004;94(8):1023-7.  
29  
30
- 31  
32  
33 8. Dündar C, Oduncu V, Erkol A, et al. In-hospital prognostic value of  
34  
35 hemoglobin levels on admission in patients with acute ST segment elevation  
36  
37 myocardial infarction undergoing primary angioplasty. *Clin Res Cardiol*  
38  
39 2012;101(1):37-44.  
40  
41
- 42  
43  
44 9. Ayhan E, Aycicek F, Uyarel H, et al. Patients with anemia on admission  
45  
46 who have undergone primary angioplasty for ST elevation myocardial  
47  
48 infarction: in-hospital and long-term clinical outcomes. *Coron Artery Dis*  
49  
50 2011;22(6):375-9.  
51  
52  
53  
54  
55  
56  
57  
58  
59  
60

- 1  
2  
3 10. Kiviniemi T, Karjalainen P, Rubboli A, et al. Thrombocytopenia in patients  
4  
5 with atrial fibrillation on oral anticoagulation undergoing percutaneous  
6  
7 coronary intervention. *Am J Cardiol* 2013 Aug 15;112(4):493-8.  
8  
9
- 10  
11 11. Schlitt A, Rubboli A, Lip GY, et al; for the AFCAS (Management of  
12  
13 patients with Atrial Fibrillation undergoing Coronary Artery Stenting Study  
14  
15 Group). The management of patients with atrial fibrillation undergoing  
16  
17 percutaneous coronary intervention with stent implantation: In-hospital-data  
18  
19 from the atrial fibrillation undergoing coronary artery stenting study.  
20  
21 *Catheter Cardiovasc Interv* 2013 Jun 13. doi: 10.1002/ccd.25064. [Epub  
22  
23 ahead of print]  
24  
25  
26  
27  
28
- 29 12. Mehran R, Rao SV, Bhatt DL, et al. Standardized bleeding definitions for  
30  
31 cardiovascular clinical trials: a consensus report from the bleeding academic  
32  
33 research consortium, *Circulation* 2011;123:2736-2747.  
34  
35  
36
- 37 13. Nutritional anaemias. Report of a WHO scientific group. *World Health*  
38  
39 *Organ Tech* 1968;405:5-32.  
40  
41
- 42 14. Pilgrim T, Vetterli F, Kalesan B, et al. The impact of anemia on long-term  
43  
44 clinical outcome in patients undergoing revascularization with the  
45  
46 unrestricted use of drug-eluting stents. *Circ Cardiovasc Interv.*  
47  
48 2012;5(2):202-10.  
49  
50  
51  
52  
53  
54  
55  
56  
57  
58  
59  
60

- 1  
2  
3 15.Lee PC, Kini AS, Ahsan C, et al. Anemia is an independent predictor of  
4 mortality after percutaneous coronary intervention. *J Am Coll Cardiol.*  
5  
6 2004;44(3):541-6.  
7  
8  
9  
10  
11 16.Kim TH, Koh YS, Chang K, et al; CathOlic university of Korea –  
12 percutAneous Coronary inTervention registry investigators. Improved  
13 anemia is associated with favorable long-term clinical outcomes in patients  
14 undergoing PCI. *Coron Artery Dis* 2012;23(6):391-9.  
15  
16  
17  
18  
19  
20  
21 17.Kitai Y, Ozasa N, Morimoto T, et al; on behalf of the CREDO-Kyoto  
22 registry investigators. Prognostic implications of anemia with or without  
23 chronic kidney disease in patients undergoing elective percutaneous  
24 coronary intervention. *Int J Cardiol* 2013 Aug 16. doi:  
25 10.1016/j.ijcard.2013.08.029.  
26  
27  
28  
29  
30  
31  
32  
33  
34  
35 18.Hosseini SK, Ansari MJ, Lotfi Tokaldany M, et al. Association between  
36 preprocedural hemoglobin level and 1-year outcome of elective  
37 percutaneous coronary intervention. *J Cardiovasc Med.* 2013 Feb 15. [Epub  
38 ahead of print]  
39  
40  
41  
42  
43  
44  
45 19.Manzano-Fernández S, Pastor FJ, Marín F, et al. Increased major bleeding  
46 complications related to triple antithrombotic therapy usage in patients with  
47 atrial fibrillation undergoing percutaneous coronary artery stenting. *Chest*  
48 2008;134(3):559-67.  
49  
50  
51  
52  
53  
54  
55  
56  
57  
58  
59  
60

- 1  
2  
3 20.Toma C, Zahr F, Moguilanski D, et al. Impact of anemia on platelet  
4  
5 response to clopidogrel in patients undergoing percutaneous coronary  
6  
7 stenting. *Am J Cardiol* 2012;109(8):1148-53.  
8  
9  
10  
11 21.Foley RN, Parfrey PS, Hamett JD, et al. The impact of anemia on  
12  
13 cardiomyopathy, morbidity, and mortality in end-stage renal disease. *Am J*  
14  
15 *Kidney Dis* 1996;28:53– 61.  
16  
17  
18  
19 22.Maluenda G, Lemesle G, Ben-Dor I, et al. Value of blood transfusion in  
20  
21 patients with a blood hematocrit of 24% to 30% after percutaneous coronary  
22  
23 intervention. *Am J Cardiol* 2009;104:1069 –1073.  
24  
25  
26  
27  
28  
29  
30  
31  
32  
33  
34  
35  
36  
37  
38  
39  
40  
41  
42  
43  
44  
45  
46  
47  
48  
49  
50  
51  
52  
53  
54  
55  
56  
57  
58  
59  
60

**FIGURE LEGENDS**

Figure 1 Kaplan-Meier survival curves for the occurrence of adverse events in anemic (dotted lines) versus non-anemic (solid line) patients at 2-month follow-up: all-cause mortality (a), MACCE free survival (b) and bleeding event free survival (c)

For peer review only

1  
2  
3  
4  
5  
6  
7  
8  
9  
10  
11  
12  
13  
14  
15  
16  
17  
18  
19  
20  
21  
22  
23  
24  
25  
26  
27  
28  
29  
30  
31  
32  
33  
34  
35  
36  
37  
38  
39  
40  
41  
42  
43  
44  
45  
46  
47  
48  
49  
50  
51  
52  
53  
54  
55  
56  
57  
58  
59  
60

For peer review only

1  
2  
3  
4  
5  
6  
7  
8  
9  
10  
11  
12  
13  
14  
15  
16  
17  
18  
19  
20  
21  
22  
23  
24  
25  
26  
27  
28  
29  
30  
31  
32  
33  
34  
35  
36  
37  
38  
39  
40  
41  
42  
43  
44  
45  
46  
47  
48  
49  
50  
51  
52  
53  
54  
55  
56  
57  
58  
59  
60

For peer review only

1  
2  
3  
4  
5  
6  
7  
8  
9  
10  
11  
12  
13  
14  
15  
16  
17  
18  
19  
20  
21  
22  
23  
24  
25  
26  
27  
28  
29  
30  
31  
32  
33  
34  
35  
36  
37  
38  
39  
40  
41  
42  
43  
44  
45  
46  
47  
48  
49  
50  
51  
52  
53  
54  
55  
56  
57  
58  
59  
60

For peer review only



1  
2  
3  
4  
5  
6  
7  
8  
9  
10  
11  
12  
13  
14  
15  
16  
17  
18  
19  
20  
21  
22  
23  
24  
25  
26  
27  
28  
29  
30  
31  
32  
33  
34  
35  
36  
37  
38  
39  
40  
41  
42  
43  
44  
45  
46  
47  
48  
49  
50  
51  
52  
53  
54  
55  
56  
57  
58  
59  
60

For peer review only

1  
2  
3  
4  
5  
6  
7  
8  
9  
10  
11  
12  
13  
14  
15  
16  
17  
18  
19  
20  
21  
22  
23  
24  
25  
26  
27  
28  
29  
30  
31  
32  
33  
34  
35  
36  
37  
38  
39  
40  
41  
42  
43  
44  
45  
46  
47  
48  
49  
50  
51  
52  
53  
54  
55  
56  
57  
58  
59  
60

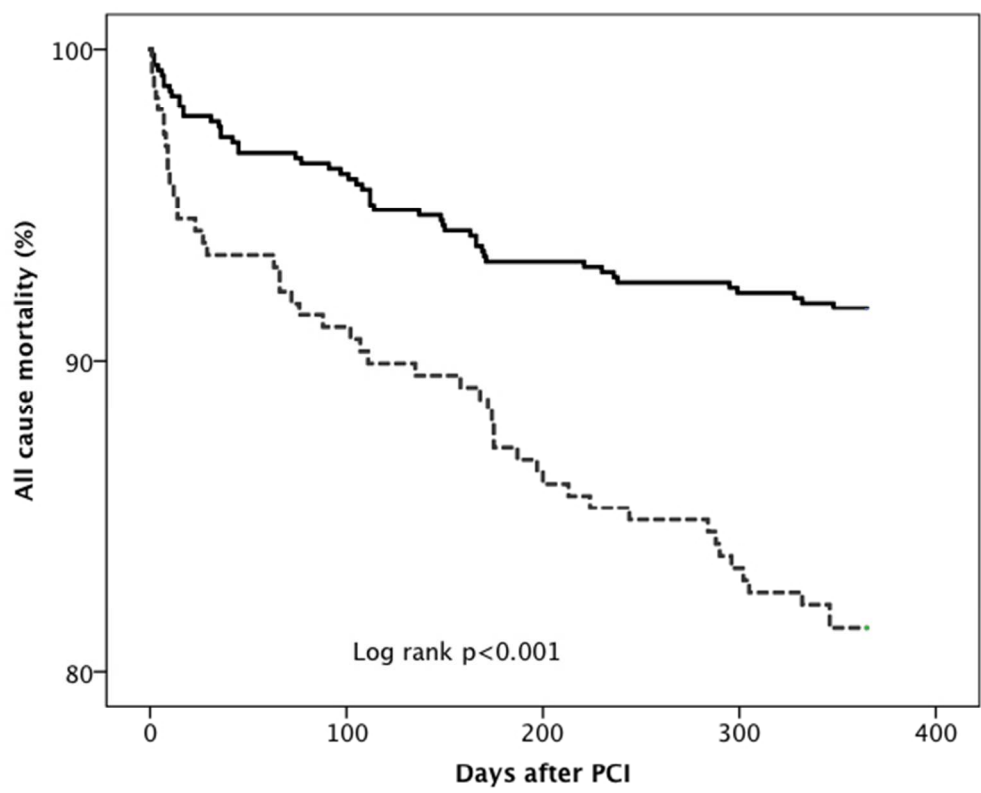

Figure 1 a  
220x176mm (72 x 72 DPI)

ew only

1  
2  
3  
4  
5  
6  
7  
8  
9  
10  
11  
12  
13  
14  
15  
16  
17  
18  
19  
20  
21  
22  
23  
24  
25  
26  
27  
28  
29  
30  
31  
32  
33  
34  
35  
36  
37  
38  
39  
40  
41  
42  
43  
44  
45  
46  
47  
48  
49  
50  
51  
52  
53  
54  
55  
56  
57  
58  
59  
60

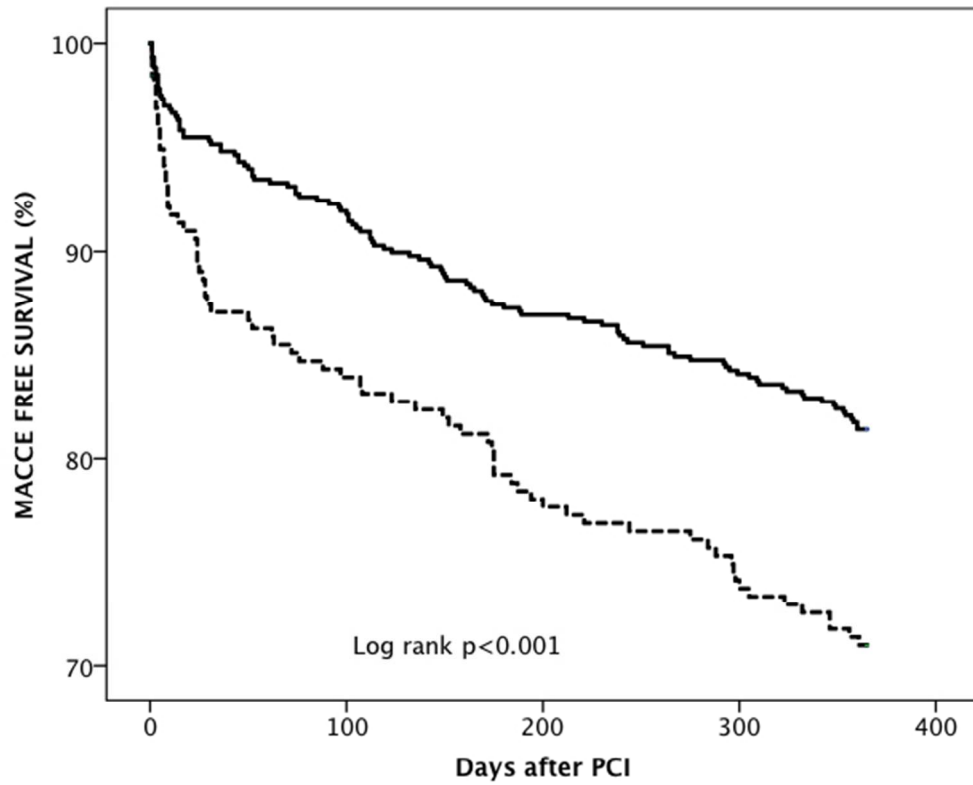

Figure 1 b  
220x176mm (72 x 72 DPI)

ew only

1  
2  
3  
4  
5  
6  
7  
8  
9  
10  
11  
12  
13  
14  
15  
16  
17  
18  
19  
20  
21  
22  
23  
24  
25  
26  
27  
28  
29  
30  
31  
32  
33  
34  
35  
36  
37  
38  
39  
40  
41  
42  
43  
44  
45  
46  
47  
48  
49  
50  
51  
52  
53  
54  
55  
56  
57  
58  
59  
60

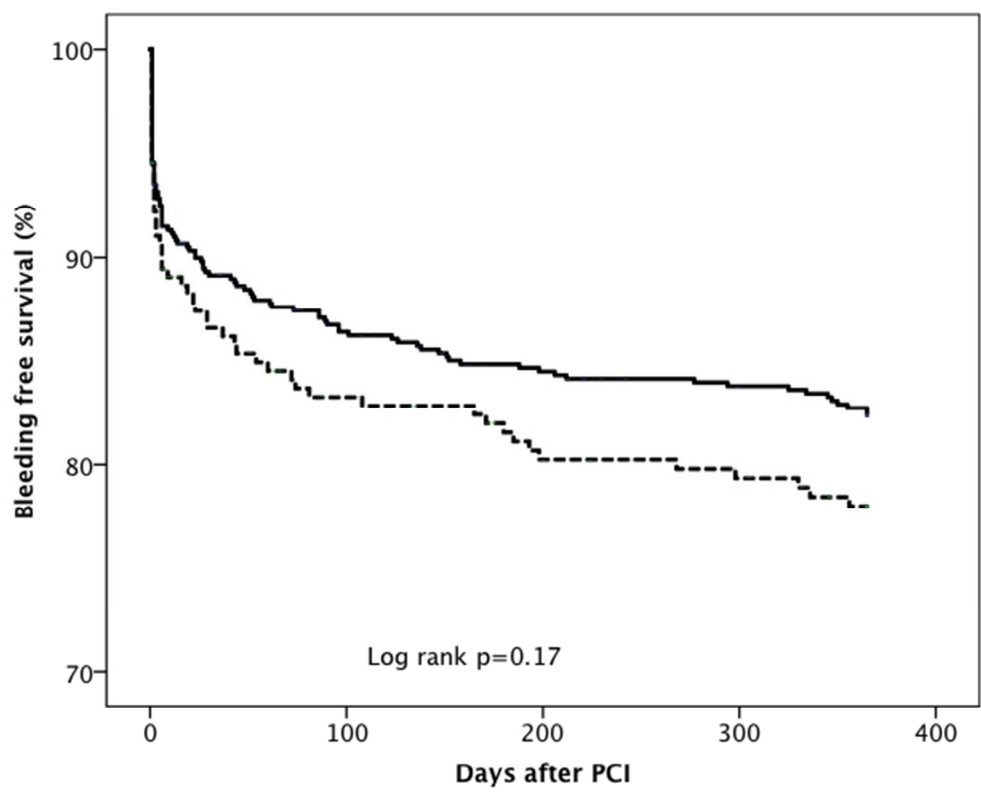

Figure 1 c  
220x176mm (72 x 72 DPI)

ew only

**Table 1.** Bleeding Academic Research Consortium Definition for Bleeding.

|                |                                                                                                                                                                                                                                                                                                                                                                                                                                                               |
|----------------|---------------------------------------------------------------------------------------------------------------------------------------------------------------------------------------------------------------------------------------------------------------------------------------------------------------------------------------------------------------------------------------------------------------------------------------------------------------|
| <b>Type 2</b>  | any overt, actionable sign of hemorrhage (eg, more bleeding than would be expected for a clinical circumstance, including bleeding found by imaging alone) that does not fit the criteria for type 3, 4, or 5 but does meet at least one of the following criteria:<br><br>(1) requiring nonsurgical, medical intervention by a healthcare professional,<br><br>(2) leading to hospitalization or increased level of care, or<br><br>(3) prompting evaluation |
| <b>Type 3a</b> | Overt bleeding plus hemoglobin drop of 3 to 5 g/dL* (provided hemoglobin drop is related to bleed)<br><br>Any transfusion with overt bleeding                                                                                                                                                                                                                                                                                                                 |
| <b>Type 3b</b> | Overt bleeding plus hemoglobin drop >5 g/dL* (provided hemoglobin drop is related to bleed)<br><br>Cardiac tamponade<br><br>Bleeding requiring surgical intervention for control (excluding dental/nasal/skin/hemorrhoid)<br><br>Bleeding requiring intravenous vasoactive agents                                                                                                                                                                             |
| <b>Type 3c</b> | Intracranial hemorrhage (does not include microbleeds or hemorrhagic transformation, does include intraspinal)<br><br>Subcategories confirmed by autopsy or imaging or lumbar puncture<br><br>Intraocular bleed compromising vision                                                                                                                                                                                                                           |
| <b>Type 5</b>  | fatal bleeding                                                                                                                                                                                                                                                                                                                                                                                                                                                |

Type 1 and type 4 (coronary bypass related) bleeding events were not included in the analysis.

**Online Table 2** Bleeding events at 12-month follow-up in the two study subgroups

| Endpoints            | Anemia (N=258) | Non-anemic<br>(N=603) | <i>p</i> value |
|----------------------|----------------|-----------------------|----------------|
| BARC 2               | 22 (8.5)       | 48 (8.0)              | 0.786          |
| BARC 3a bleeding     | 18 (7.0)       | 20 (3.3)              | 0.028          |
| BARC 3b bleeding     | 10 (3.9)       | 22 (3.6)              | 0.846          |
| BARC 3c bleeding     | 0 (0)          | 9 (1.5)               | 0.064          |
| BARC 5 bleeding      | 4 (1.6)        | 5 (0.8)               | 0.464          |
| Total adverse events | 111 (43.0)     | 190 (31.5)            | 0.001          |

Variables are presented as frequency (percentage).

BARC indicates Bleeding Academic Research Consortium.

STROBE Statement—Checklist of items that should be included in reports of *cohort studies*

|                              | Item No | Recommendation                                                                                                                                                                                                                                                                                                                  |
|------------------------------|---------|---------------------------------------------------------------------------------------------------------------------------------------------------------------------------------------------------------------------------------------------------------------------------------------------------------------------------------|
| <b>Title and abstract</b>    | 1       | (a) Indicate the study's design with a commonly used term in the title or the abstract ok<br>(b) Provide in the abstract an informative and balanced summary of what was done and what was found ok                                                                                                                             |
| <b>Introduction</b>          |         |                                                                                                                                                                                                                                                                                                                                 |
| Background/rationale         | 2       | Explain the scientific background and rationale for the investigation being reported ok                                                                                                                                                                                                                                         |
| Objectives                   | 3       | State specific objectives, including any prespecified hypotheses ok                                                                                                                                                                                                                                                             |
| <b>Methods</b>               |         |                                                                                                                                                                                                                                                                                                                                 |
| Study design                 | 4       | Present key elements of study design early in the paper ok                                                                                                                                                                                                                                                                      |
| Setting                      | 5       | Describe the setting, locations, and relevant dates, including periods of recruitment, exposure, follow-up, and data collection ok                                                                                                                                                                                              |
| Participants                 | 6       | (a) Give the eligibility criteria, and the sources and methods of selection of participants. Describe methods of follow-up ok<br>(b) For matched studies, give matching criteria and number of exposed and unexposed                                                                                                            |
| Variables                    | 7       | Clearly define all outcomes, exposures, predictors, potential confounders, and effect modifiers. Give diagnostic criteria, if applicable ok                                                                                                                                                                                     |
| Data sources/<br>measurement | 8*      | For each variable of interest, give sources of data and details of methods of assessment (measurement). Describe comparability of assessment methods if there is more than one group                                                                                                                                            |
| Bias                         | 9       | Describe any efforts to address potential sources of bias                                                                                                                                                                                                                                                                       |
| Study size                   | 10      | Explain how the study size was arrived at                                                                                                                                                                                                                                                                                       |
| Quantitative variables       | 11      | Explain how quantitative variables were handled in the analyses. If applicable, describe which groupings were chosen and why ok                                                                                                                                                                                                 |
| Statistical methods          | 12      | (a) Describe all statistical methods, including those used to control for confounding ok<br>(b) Describe any methods used to examine subgroups and interactions ok<br>(c) Explain how missing data were addressed ok<br>(d) If applicable, explain how loss to follow-up was addressed<br>(e) Describe any sensitivity analyses |
| <b>Results</b>               |         |                                                                                                                                                                                                                                                                                                                                 |
| Participants                 | 13*     | (a) Report numbers of individuals at each stage of study—eg numbers potentially eligible, examined for eligibility, confirmed eligible, included in the study, completing follow-up, and analysed ok<br>(b) Give reasons for non-participation at each stage<br>(c) Consider use of a flow diagram                              |
| Descriptive data             | 14*     | (a) Give characteristics of study participants (eg demographic, clinical, social) and information on exposures and potential confounders ok<br>(b) Indicate number of participants with missing data for each variable of interest ok<br>(c) Summarise follow-up time (eg, average and total amount) ok                         |
| Outcome data                 | 15*     | Report numbers of outcome events or summary measures over time ok                                                                                                                                                                                                                                                               |
| Main results                 | 16      | (a) Give unadjusted estimates and, if applicable, confounder-adjusted estimates and their precision (eg, 95% confidence interval). Make clear which confounders were adjusted for and why they were included ok                                                                                                                 |

|                          |    |                                                                                                                                                                               |
|--------------------------|----|-------------------------------------------------------------------------------------------------------------------------------------------------------------------------------|
|                          |    | (b) Report category boundaries when continuous variables were categorized ok                                                                                                  |
|                          |    | (c) If relevant, consider translating estimates of relative risk into absolute risk for a meaningful time period                                                              |
| Other analyses           | 17 | Report other analyses done—eg analyses of subgroups and interactions, and sensitivity analyses ok                                                                             |
| <b>Discussion</b>        |    |                                                                                                                                                                               |
| Key results              | 18 | Summarise key results with reference to study objectives ok                                                                                                                   |
| Limitations              | 19 | Discuss limitations of the study, taking into account sources of potential bias or imprecision. Discuss both direction and magnitude of any potential bias ok                 |
| Interpretation           | 20 | Give a cautious overall interpretation of results considering objectives, limitations, multiplicity of analyses, results from similar studies, and other relevant evidence ok |
| Generalisability         | 21 | Discuss the generalisability (external validity) of the study results ok                                                                                                      |
| <b>Other information</b> |    |                                                                                                                                                                               |
| Funding                  | 22 | Give the source of funding and the role of the funders for the present study and, if applicable, for the original study on which the present article is based ok              |

\*Give information separately for exposed and unexposed groups.

**Note:** An Explanation and Elaboration article discusses each checklist item and gives methodological background and published examples of transparent reporting. The STROBE checklist is best used in conjunction with this article (freely available on the Web sites of PLoS Medicine at <http://www.plosmedicine.org/>, Annals of Internal Medicine at <http://www.annals.org/>, and Epidemiology at <http://www.epidem.com/>). Information on the STROBE Initiative is available at <http://www.strobe-statement.org>.



# BMJ Open

## Impact of anemia on clinical outcome in patients with atrial fibrillation undergoing percutaneous coronary intervention: insights from the AFCAS registry

|                                 |                                                                                                                                                                                                                                                                                                                                                                                                                                                                                                                                                                                                                                                                                             |
|---------------------------------|---------------------------------------------------------------------------------------------------------------------------------------------------------------------------------------------------------------------------------------------------------------------------------------------------------------------------------------------------------------------------------------------------------------------------------------------------------------------------------------------------------------------------------------------------------------------------------------------------------------------------------------------------------------------------------------------|
| Journal:                        | <i>BMJ Open</i>                                                                                                                                                                                                                                                                                                                                                                                                                                                                                                                                                                                                                                                                             |
| Manuscript ID:                  | bmjopen-2013-004700.R1                                                                                                                                                                                                                                                                                                                                                                                                                                                                                                                                                                                                                                                                      |
| Article Type:                   | Research                                                                                                                                                                                                                                                                                                                                                                                                                                                                                                                                                                                                                                                                                    |
| Date Submitted by the Author:   | 20-Mar-2014                                                                                                                                                                                                                                                                                                                                                                                                                                                                                                                                                                                                                                                                                 |
| Complete List of Authors:       | Puurunen, Marja; Finnish Red Cross Blood Service, Laboratory of Hemostasis<br>Kiviniemi, Tuomas; Turku University Hospital, Heart Center<br>Nammass, Wail; Turku University Hospital, Heart Center<br>Schlitt, Axel; Martin Luther University Halle-Wittenberg, Medical Faculty<br>Rubboli, Andrea; Ospedale Maggiore, Division of Cardiology<br>Nyman, Kai; Central Finland Central Hospital, Department of Cardiology<br>Karjalainen, Pasi; Satakunta Central Hospital, Heart Center<br>Kirchhof, Paulus; University of Birmingham, Centre for Cardiovascular Sciences<br>Lip, Gregory; University Department of Medicine,<br>Airaksinen, Juhani; Turku University Hospital, Heart Center |
| <b>Primary Subject Heading</b>: | Cardiovascular medicine                                                                                                                                                                                                                                                                                                                                                                                                                                                                                                                                                                                                                                                                     |
| Secondary Subject Heading:      | Haematology (incl blood transfusion)                                                                                                                                                                                                                                                                                                                                                                                                                                                                                                                                                                                                                                                        |
| Keywords:                       | HAEMATOLOGY, CARDIOLOGY, Coronary intervention < CARDIOLOGY, Anaemia < HAEMATOLOGY, Anticoagulation < HAEMATOLOGY                                                                                                                                                                                                                                                                                                                                                                                                                                                                                                                                                                           |
|                                 |                                                                                                                                                                                                                                                                                                                                                                                                                                                                                                                                                                                                                                                                                             |

SCHOLARONE™  
Manuscripts

1  
2  
3  
4 **Impact of anemia on clinical outcome in patients with atrial fibrillation**  
5  
6 **undergoing percutaneous coronary intervention: insights from the AFCAS**  
7  
8 **registry**  
9  
10

11  
12  
13  
14 **Puurunen Marja\***, **Kiviniemi Tuomas†**, **Nammas Wail†**, **Schlitt Axel ‡**, **Rubboli**  
15 **Andrea§**, **Nyman Kai#**, **Karjalainen Pasi¶**, **Kirchhof Paulus††,\*\***, **Lip Gregory YH††**,  
16  
17 **Airaksinen KE Juhani†**  
18  
19

20  
21 \* Hemostasis laboratory, Finnish Red Cross Blood Service, Helsinki, Finland

22 †Heart Center, Turku University Hospital and University of Turku, Turku, Finland;

23 ‡Medical Faculty, Martin Luther University Halle-Wittenberg, Halle-Wittenberg, Germany;

24 §Division of Cardiology, Laboratory of Interventional Cardiology, Ospedale Maggiore,  
25 Bologna, Italy;

26 #Department of Cardiology, Central Finland Central Hospital, Jyväskylä, Finland;

27 ¶Heart Center, Satakunta Central Hospital, Pori, Finland;

28 \*\* Department of Cardiovascular Medicine, Hospital of the University of Münster, Münster,  
29 Germany  
30

31 ††University of Birmingham Centre for Cardiovascular Sciences, City Hospital, Birmingham,  
32 United Kingdom  
33

34  
35 **Address for correspondence:** Dr. K. E. Juhani Airaksinen, Heart Center, Turku University  
36 Hospital, Kiinamylynkatu 4-8, FIN-20520 Turku, Finland.  
37

38 Email: juhani.airaksinen@tyks.fi  
39

40 **Word count** (excluding title page, abstract, tables, figures and references) 2725  
41  
42  
43  
44  
45  
46  
47  
48  
49  
50  
51

1  
2  
3 **Contributorship statement:** Marja Puurunen and Tuomas Kiviniemi participated in data  
4 collection and analysis and writing the manuscript; Wail Nammas contributed to data analysis  
5 and writing of the manuscript; Axel Schlitt, Andrea Rubboli, Kai Nyman, Pasi Karjalainen  
6 and Paulus Kirchhof contributed to data collection and critical revision of the manuscript;  
7 Gregory Lip contributed to study design, data collection and critical revision of the  
8 manuscript; Juhani Airaksinen acted as the primary investigator of the AFCAS study and  
9 contributed to study design, data collection, data analysis and writing of the manuscript.  
10  
11  
12  
13  
14  
15  
16  
17  
18  
19  
20

21 **Extra data** is available by emailing Prof. Juhani Airaksinen at [juhani.airaksinen@tyks.fi](mailto:juhani.airaksinen@tyks.fi).  
22  
23  
24  
25  
26  
27  
28  
29  
30  
31  
32  
33  
34  
35  
36  
37  
38  
39  
40  
41  
42  
43  
44  
45  
46  
47  
48  
49  
50  
51  
52  
53  
54  
55  
56  
57  
58  
59  
60

## ABSTRACT

**Objectives:** Anemia has an adverse impact on the outcome in the general patient population undergoing percutaneous coronary intervention (PCI). The aim of this study was to analyze the impact of anemia on the 12-month clinical outcome of patients with atrial fibrillation (AF) undergoing PCI and therefore requiring intense antithrombotic treatment. We hypothesized that anemia might be associated with a worse outcome and more bleeding in these anticoagulated patients.

**Setting:** Data was collected from 17 secondary care centers in Europe.

**Participants:** Consecutive patients with AF undergoing PCI were enrolled in the prospective, multicenter AFCAS (Atrial Fibrillation undergoing Coronary Artery Stenting) registry. Altogether 929 patients participated in the study. Preprocedural haemoglobin concentration was available for 861 (92.7%) (30% female). Only exclusion criteria were inability or unwillingness to give informed consent. Anemia was defined as a haemoglobin concentration of <12 g/dl for women, and <13 g/dl for men.

**Outcome measures:** The primary endpoint was occurrence of major adverse cardiac and cerebrovascular events (MACCE) or bleeding events.

**Results:** 258/861 (30%) patients had anemia. Anemic patients were older, had more often diabetes, higher CHA<sub>2</sub>DS<sub>2</sub>-VASc score, prior history of heart

1  
2  
3 failure, chronic renal impairment, and acute coronary syndrome. Anemic  
4  
5 patients had more MACCE than non-anemic (29.1% versus 19.4%,  
6  
7 respectively,  $p=0.002$ ), and minor bleeding events (7.0% versus 3.3%,  
8  
9 respectively,  $p=0.028$ ), with a trend toward more total bleeding events (25.2%  
10  
11 versus 21.7%, respectively,  $p=0.059$ ). No difference was observed in  
12  
13 antithrombotic regimens at discharge. In multivariate analysis anemia was an  
14  
15 independent predictor of all-cause mortality at 12-months follow-up (HR 1.62,  
16  
17 95% CI 1.05 – 2.51,  $p=0.029$ ).  
18  
19  
20  
21  
22  
23

24 **Conclusions:** Anemia was a frequent finding in patients with AF referred for  
25  
26 PCI. Anemic patients had a higher all-cause mortality, more thrombotic events,  
27  
28 and minor bleeding events. Anemia seems to identify patients at risk for  
29  
30 cardiovascular events and death.  
31  
32  
33

34  
35 **Trial registration:** ClinicalTrials.gov number NCT00596570  
36  
37  
38  
39

40 **Keywords:** atrial fibrillation, percutaneous coronary intervention, anemia  
41  
42  
43  
44  
45

#### 46 **Strengths and limitations of the study:**

- 47  
48 - The strength of the study is the enrolment of consecutive patients with  
49  
50 the only exclusion criteria being unwillingness/inability to participate in  
51  
52 the study. In this sense the study population represents well real-world  
53  
54 patients with AF referred for PCI.  
55  
56  
57  
58  
59  
60

- 1  
2  
3  
4  
5  
6  
7  
8  
9  
10  
11  
12  
13  
14  
15  
16  
17  
18  
19  
20  
21  
22  
23  
24  
25  
26  
27  
28  
29  
30  
31  
32  
33  
34  
35  
36  
37  
38  
39  
40  
41  
42  
43  
44  
45  
46  
47  
48  
49  
50  
51  
52  
53  
54  
55  
56  
57  
58  
59  
60
- The study adds to our knowledge on the prevalence and impact of anemia in AF patients undergoing PCI and thus requiring combination antithrombotic medication. It shows that anemia is a frequent finding and that even mild anemia has an adverse impact on outcome.
  - The current study has the inherent limitations of the observational study design, including individual risk-based decision making in treatment choices, which may introduce selection bias. Another possible confounder is the heterogeneity of the AF population among the participating centers and some differences in the periprocedural routines.
  - The aetiology of anemia could not be systematically investigated and is therefore out of the scope of this study.

## INTRODUCTION

It is estimated that around 5% of patients undergoing percutaneous coronary intervention (PCI) need long-term oral anticoagulation (OAC) due to atrial fibrillation (AF).[1,2] Yet, the current recommendations on the management of antithrombotic treatment in patients with AF undergoing PCI and stenting are mainly derived from small studies, amounting to a weak level of evidence.[3,4] Moreover, the real-world management of patients on OAC undergoing PCI is variable, and only partially adherent to the current recommendations.[5]

Defined according to the World Health Organization (WHO), anemia has been reported to affect nearly 25% of patients undergoing PCI and stenting. Anemic patients undergoing PCI are generally older with more comorbidities, and have higher rates of in-hospital mortality and major adverse cardiac and cerebrovascular events (MACCE), as well as 1-year mortality.[6,7] Furthermore, low admission haemoglobin level was found to be an independent predictor of in-hospital and long-term mortality, and was associated with higher rates of in-hospital minor and major bleeding events in patients undergoing primary PCI for ST-segment elevation myocardial infarction (MI).[8,9]

However, little is known about the effect of anemia on the outcome of patients with AF undergoing PCI and thus requiring intensive antithrombotic treatment. Anemia is possibly a marker of high bleeding risk, which could be aggravated by the underlying cause. Therefore, we analyzed data from the

1  
2  
3 prospective AFCAS (Atrial Fibrillation undergoing Coronary Artery Stenting)  
4  
5  
6 registry to explore the impact of anemia on the 12-month clinical outcome of  
7  
8 patients with AF undergoing PCI.[10]  
9

## 10 11 12 13 **METHODS**

### 14 15 **Patients**

16  
17 The AFCAS registry (ClinicalTrials.gov number NCT00596570)  
18  
19 is a prospective, multicenter registry that enrolled patients with AF referred for  
20  
21 PCI in 5 European countries. The study design has been described in detail  
22  
23 previously.[11] Patients were enrolled if they had: 1) history of AF  
24  
25 (paroxysmal, persistent, or permanent), or 2) on-going AF during the index  
26  
27 PCI. Out of the 929 participants 861 (92.7%) had a preprocedural haemoglobin  
28  
29 count available and were included in this analysis.  
30  
31  
32  
33  
34  
35  
36  
37  
38  
39

40  
41 Coronary angiography and PCI were performed via either radial or femoral  
42  
43 access, and hemostasis was achieved according to local practice. Coronary  
44  
45 lesions were treated according to contemporary interventional techniques. Low-  
46  
47 molecular-weight heparin (enoxaparin sodium, dalteparin), unfractionated  
48  
49 heparin, bivalirudin, and glycoprotein IIb/IIIa inhibitors were administered at  
50  
51 the operator's discretion. The post-discharge medication was completely at the  
52  
53 discretion of the treating physician.  
54  
55  
56  
57  
58  
59  
60



1  
2  
3  
4  
5  
6 The primary endpoints of the current study were 1) occurrence of MACCE  
7  
8 defined as a composite of all-cause mortality, any non-fatal MI, any  
9  
10 revascularization, definite/probable stent thrombosis, transient ischemic attack  
11  
12 (TIA) or stroke, and peripheral arterial embolism; 2) bleeding events; and 3)  
13  
14 total adverse events (a composite of MACCE plus bleeding events). Bleeding  
15  
16 events were defined according to the Bleeding Academic Research Consortium  
17  
18 (BARC) criteria as minor (BARC 2), and major (BARC 3a, 3b, 3c and 5)  
19  
20 bleeding events; however, CABG-related bleeding was excluded.[12] (Online  
21  
22 Table 1)  
23  
24  
25  
26  
27  
28  
29  
30  
31

32 Anemia was defined as a haemoglobin concentration of <12 g/dl for women,  
33  
34 and <13 g/dl for men, according to the definition of the WHO.[13] Chronic  
35  
36 renal impairment was defined by an estimated glomerular filtration rate below  
37  
38 60 ml/min.  
39  
40  
41  
42  
43  
44

### 45 **Ethical aspects**

46  
47  
48 The study was initiated by the investigators and conducted according to the  
49  
50 ethical guidelines of the 1964 Declaration of Helsinki, as revised in 2002.  
51  
52  
53 Informed written consent was obtained from every patient after full explanation  
54  
55  
56  
57  
58  
59  
60

1  
2  
3 of the study protocol. The study protocol was approved by the ethics  
4  
5 committees of the participating centers.  
6  
7  
8  
9

### 10 11 **Statistical analysis**

12  
13 For analysis patients with available preprocedural measurement of haemoglobin  
14  
15 concentration were divided into two subgroups: anemic patients, and control  
16  
17 patients without anemia. Continuous variables were reported as the mean  $\pm$   
18  
19 standard deviation if normally distributed, and as median [inter-quartile range  
20  
21 (IQR)] if they were skewed. Data were tested for normal distribution using the  
22  
23 Kolmogorov-Smirnov and Shapiro-Wilk tests. Categorical variables were  
24  
25 described with absolute and relative (percentage) frequencies. Comparisons  
26  
27 between the two study subgroups were performed using the unpaired *t*-test or  
28  
29 Mann-Whitney test for continuous variables, and Pearson  $\chi^2$  or Fisher's exact  
30  
31 test for categorical variables, as appropriate. Cox regression hazard model was  
32  
33 used to identify the independent predictors of MACCE, and all-cause mortality  
34  
35 at 12-month follow-up. Baseline variables correlating at  $p < 0.10$  level with the  
36  
37 dependent variable in univariate analyses were entered in the Cox regression  
38  
39 model as covariates. Cox regression hazard model was used to identify the  
40  
41 independent predictors of MACCE, and all-cause mortality at 12-month follow-  
42  
43 up in the subgroup of anemic patients. Finally we constructed Kaplan-Meier  
44  
45 survival curves to display the time-to-event relationship for the occurrence of  
46  
47  
48  
49  
50  
51  
52  
53  
54  
55  
56  
57  
58  
59  
60

1  
2  
3 all-cause mortality, MACCE, and all bleeding events. Statistical analysis was  
4  
5 performed using SPSS statistical software (SPSS v. 16.0.1, SPSS Inc., Chicago,  
6  
7 Ill., USA).  
8  
9

## 10 11 12 13 **RESULTS**

### 14 **Baseline characteristics**

15  
16  
17  
18  
19 Out of 929 patients enrolled in the AFCAS registry and followed up for 12  
20  
21 months, 861 (92.7%) had available preprocedural measurement of haemoglobin  
22  
23 concentration, of whom 258 (30%) had anemia and 603 (70%) had normal  
24  
25 haemoglobin concentration. Anemic patients were older, more likely to have  
26  
27 diabetes mellitus, hypertension, history of heart failure and chronic renal  
28  
29 impairment, HAS-BLED score  $\geq 3$ , higher CHA<sub>2</sub>DS<sub>2</sub>VASC score, and more  
30  
31 likely presented with acute coronary syndrome (ACS) as opposed to chronic  
32  
33 stable angina, compared with those without anemia ( $p < 0.05$  for all), as shown  
34  
35 in Table 1. Furthermore, anemic patients had more vessels treated during the  
36  
37 index procedure, and a greater total stent length, compared with those without  
38  
39 anemia ( $p < 0.05$  for both) (Table 2). At discharge, no significant differences  
40  
41 were seen in the prescription of antithrombotic medications in the two study  
42  
43 groups ( $p = 0.15$ ) (Table 3). The duration of clopidogrel treatment did not differ  
44  
45 in anemic versus non-anemic patients on triple therapy (median [IQR]: 3 [11]  
46  
47 versus 3 [5] months,  $p = 0.61$ ), on dual antiplatelet therapy (median [IQR]: 12  
48  
49  
50  
51  
52  
53  
54  
55  
56  
57  
58  
59  
60

[11] versus 12 [11] months,  $p=0.72$ ), or on vitamin K antagonist + clopidogrel (median [IQR]: 12 [11] versus 3 [11] months,  $p=0.65$ ). Proton pump inhibitors were more frequently prescribed to patients with anemia versus those without (47.7 versus 31.3%, respectively,  $p < 0.001$ ).

**Table 1** Baseline clinical characteristics of the two study subgroups

| Variable                       | Anemia (N=258) | Non-anemic (N=603) | <i>p</i> value |
|--------------------------------|----------------|--------------------|----------------|
| Age (yrs)                      | 76 [9]         | 73 [11]            | <0.001         |
| Female gender                  | 89 (34.5)      | 170 (28.2)         | 0.074          |
| Diabetes mellitus              | 119 (46.1)     | 191 (31.7)         | <0.001         |
| Hypercholesterolemia           | 162 (62.8)     | 407 (67.5)         | 0.183          |
| Current or ex-smoking          | 26 (10.1)      | 62 (10.3)          | 1.00           |
| Hypertension                   | 221 (85.7)     | 503 (83.4)         | 0.48           |
| Paroxysmal atrial fibrillation | 103 (39.9)     | 229 (38.0)         | 0.594          |
| Persistent atrial fibrillation | 22 (8.5)       | 78 (12.9)          | 0.081          |
| Permanent atrial fibrillation  | 129 (50)       | 294 (48.8)         | 0.766          |

|    |                                                 |            |            |        |
|----|-------------------------------------------------|------------|------------|--------|
| 1  |                                                 |            |            |        |
| 2  |                                                 |            |            |        |
| 3  |                                                 |            |            |        |
| 4  | CHA <sub>2</sub> DS <sub>2</sub> -VASc score >4 | 148 (57.4) | 235 (39.0) | <0.001 |
| 5  |                                                 |            |            |        |
| 6  | HAS BLED score ≥3                               | 215 (83.3) | 441 (73.1) | 0.001  |
| 7  |                                                 |            |            |        |
| 8  |                                                 |            |            |        |
| 9  | History of peptic ulcer                         | 17 (6.6)   | 27 (4.5)   | 0.236  |
| 10 |                                                 |            |            |        |
| 11 |                                                 |            |            |        |
| 12 | History of cerebral hemorrhage                  | 4 (1.6)    | 6 (1.0)    | 0.497  |
| 13 |                                                 |            |            |        |
| 14 |                                                 |            |            |        |
| 15 | History of GI hemorrhage                        | 9 (3.5)    | 12 (2.0)   | 0.144  |
| 16 |                                                 |            |            |        |
| 17 |                                                 |            |            |        |
| 18 | History of heart failure                        | 69 (26.7)  | 113 (18.7) | 0.011  |
| 19 |                                                 |            |            |        |
| 20 |                                                 |            |            |        |
| 21 | eGFR below 60 ml/min                            | 119 (52.2) | 175 (31.9) | <0.001 |
| 22 |                                                 |            |            |        |
| 23 |                                                 |            |            |        |
| 24 | Prior transient ischemic attacks                | 12 (4.7)   | 30 (5.0)   | 1.00   |
| 25 |                                                 |            |            |        |
| 26 |                                                 |            |            |        |
| 27 |                                                 |            |            |        |
| 28 | Prior stroke                                    | 36 (14.0)  | 67 (11.1)  | 0.252  |
| 29 |                                                 |            |            |        |
| 30 |                                                 |            |            |        |
| 31 | Prior MI                                        | 76 (29.5)  | 146 (24.2) | 0.126  |
| 32 |                                                 |            |            |        |
| 33 |                                                 |            |            |        |
| 34 | Prior PCI                                       | 47 (18.2)  | 100 (16.6) | 0.555  |
| 35 |                                                 |            |            |        |
| 36 |                                                 |            |            |        |
| 37 | Prior coronary bypass surgery                   | 47 (18.2)  | 78 (12.9)  | 0.057  |
| 38 |                                                 |            |            |        |
| 39 |                                                 |            |            |        |
| 40 | Proton pump inhibitors                          | 123 (47.7) | 189 (31.3) | <0.001 |
| 41 |                                                 |            |            |        |
| 42 |                                                 |            |            |        |
| 43 | Stable angina pectoris                          | 81 (31.4)  | 289 (48.0) | <0.001 |
| 44 |                                                 |            |            |        |
| 45 |                                                 |            |            |        |
| 46 | ACS                                             | 177 (68.6) | 313 (52.0) | <0.001 |
| 47 |                                                 |            |            |        |
| 48 |                                                 |            |            |        |
| 49 | Unstable angina pectoris                        | 53 (20.5)  | 107 (17.7) | 0.34   |
| 50 |                                                 |            |            |        |
| 51 |                                                 |            |            |        |
| 52 | Non-ST-elevation MI                             | 83 (32.2)  | 132 (21.9) | 0.002  |
| 53 |                                                 |            |            |        |
| 54 |                                                 |            |            |        |
| 55 | ST-elevation MI                                 | 41 (15.9)  | 74 (12.3)  | 0.156  |
| 56 |                                                 |            |            |        |
| 57 |                                                 |            |            |        |
| 58 |                                                 |            |            |        |
| 59 |                                                 |            |            |        |
| 60 |                                                 |            |            |        |

Continuous variables are presented as median [interquartile range], whereas categorical variables are presented as frequency (percentage).

ACS indicates acute coronary syndrome; eGFR, estimated glomerular filtration rate; GI, gastrointestinal, IQR, inter-quartile range; MI, myocardial infarction; PCI, percutaneous coronary intervention.

**Table 2** Procedural data of the two study subgroups

| Variable                                | Anemia<br>(N=258) | Non-anemic<br>(N=603) | <i>p</i> value |
|-----------------------------------------|-------------------|-----------------------|----------------|
| Femoral access                          | 196 (76.0)        | 435 (72.1)            | 0.275          |
| Number of treated vessels               | 1.22 ± 0.45       | 1.15 ± 0.41           | 0.04           |
| DES                                     | 67 (27.0)         | 138 (23.6)            | 0.293          |
| Peri-procedural INR                     | 1.9 [1]           | 1.88 [1]              | 0.509          |
| Stent diameter (mm)                     | 3 [1]             | 3 [1]                 | 0.965          |
| Total stent length (mm)                 | 20 [18]           | 19 [14]               | 0.014          |
| Procedural success                      | 252 (97.7)        | 582 (96.5)            | 0.085          |
| Hemostasis                              |                   |                       |                |
| Manual compression                      | 112 (43.4)        | 249 (41.3)            | 0.765          |
| Compression device <sup>a</sup>         | 49 (19.0)         | 155 (25.7)            | 0.083          |
| Access-site closure device <sup>b</sup> | 82 (31.8)         | 165 (27.4)            | 0.154          |

Continuous variables are presented as mean  $\pm$  SD or median [interquartile range], whereas categorical variables are presented as frequency (percentage).

<sup>a</sup>FemoStop<sup>®</sup>, pneumatic compression device (Radi medical system, Sweden).

<sup>b</sup>Angioseal<sup>®</sup>, closure device (St. Jude medical, USA).

DES, drug-eluting stents; INR, international normalized ratio; IQR, inter-quartile range.

**Table 3** Prescription of antithrombotic medications at discharge in the two study subgroups

| Variable             | Anemia (N=258) | Non-anemic (N=603) | <i>p</i> value |
|----------------------|----------------|--------------------|----------------|
| Triple therapy       | 181 (70.2)     | 442 (73.3)         |                |
| DAPT                 | 58 (22.5)      | 100 (16.6)         | 0.15           |
| VKA plus clopidogrel | 15 (5.8)       | 51 (8.5)           |                |
| VKA plus aspirin     | 4 (1.6)        | 10 (1.7)           |                |

Variables are presented as frequency (percentage).

VKA indicates vitamin K antagonist; DAPT, dual antiplatelet therapy.

### Clinical outcome

Clinical outcomes at 12-month follow-up are presented in table 4 and figure 1.

The primary endpoint of MACCE was significantly more frequent in anemic patients than those without anemia (29.1 versus 19.4%, respectively,  $p=0.002$ ).

This difference was driven by higher rates of all-cause mortality, non-fatal MI, and definite/probable ST ( $p<0.05$  for all). Anemic patients had more BARC 3a bleeding events (7.0 versus 3.3%, respectively,  $p=0.028$ ). No difference was

1  
2  
3 seen in BARC 5 bleedings. There was a trend toward more total bleeding  
4  
5 events (25.2% in anemic versus 21.7% in controls,  $p=0.059$ ). (For detailed  
6  
7 information on bleeding events see Online Table 2.) Total adverse events  
8  
9 occurred more frequently in anemic versus non-anemic patients (43.0 versus  
10  
11 31.5%, respectively,  $p=0.001$ ).  
12  
13  
14  
15  
16  
17  
18  
19  
20  
21  
22  
23  
24  
25  
26  
27  
28  
29  
30  
31  
32  
33  
34  
35  
36  
37  
38  
39  
40  
41  
42  
43  
44  
45  
46  
47  
48  
49  
50  
51  
52  
53  
54  
55  
56  
57  
58  
59  
60



**Table 4** Clinical outcome at 12-month follow-up in the two study subgroups

| <b>Endpoints</b>                    | <b>Anemia<br/>(N=258)</b> | <b>Non-anemic<br/>(N=603)</b> | <b>p value</b> |
|-------------------------------------|---------------------------|-------------------------------|----------------|
| MACCE                               | 75 (29.1)                 | 117 (19.4)                    | 0.002          |
| All-cause mortality                 | 48 (18.6)                 | 50 (8.3)                      | <0.001         |
| Stroke/TIA                          | 6 (2.3)                   | 17 (2.8)                      | 0.819          |
| Peripheral arterial embolism        | 2 (0.8)                   | 5 (0.8)                       | 1.00           |
| Non-fatal myocardial infarction     | 24 (9.3)                  | 27 (4.5)                      | 0.011          |
| Any revascularization               | 19 (7.4)                  | 51 (8.5)                      | 0.683          |
| Definite/probable stent thrombosis  | 10 (3.9)                  | 4 (0.7)                       | 0.002          |
| Total bleeding events               | 65 (25.2)                 | 131 (21.7)                    | 0.059          |
| Minor bleeding (BARC 2)             | 22 (8.5)                  | 48 (8.0)                      | 0.786          |
| Major bleeding (BARC 3a, 3b, 3c, 5) | 33 (12.8)                 | 56 (9.3)                      | 0.142          |
| Access site complications           | 25 (9.7)                  | 49 (8.1)                      | 0.51           |
| Pseudoaneurysm                      | 7 (2.7)                   | 18 (3.0)                      | 1.0            |
| Red blood cell transfusion          | 10 (3.9)                  | 5 (0.9)                       | 0.002          |
| Need for corrective surgery         | 5 (1.9)                   | 8 (1.3)                       | 0.25           |
| Prolonged hospitalization           | 15 (5.8)                  | 23 (3.8)                      | 0.21           |
| Total adverse events                | 111 (43.0)                | 190 (31.5)                    | 0.001          |

Variables are presented as frequency (percentage).

MACCE indicates major adverse cardiac and cerebrovascular events; TIA, transient ischemic attacks; BARC, Bleeding Academic Research Consortium.

1  
2  
3 The incidence of definite/probable stent thrombosis was significantly higher in  
4 anemic versus non-anemic patients (3.9 versus 0.7%, respectively,  $p=0.002$ ).  
5  
6 Patients who developed stent thrombosis more often presented with ACS than  
7  
8 those who did not (80.0 versus 56.6%, respectively,  $p=0.07$ ); however, the use  
9  
10 of triple therapy did not differ statistically between groups (60.0 versus 73.3%,  
11  
12 respectively,  $p=0.25$ ). Overall, nearly half (46.7%) of ST events occurred early  
13  
14 (<30 days). Acute (<24h after index PCI); early (<30 days) and late ST (>30  
15  
16 and < 365 days) were detected in 1 (0.4%) and 1 (0.2%) ( $p=0.51$ ); 4 (1.6%) vs.  
17  
18 2 (0.3%) ( $p=0.07$ ); and 6 (2.3%) vs. 2 (0.3%) ( $p=0.01$ ) in patients with anemia  
19  
20 vs. those without anemia, respectively.  
21  
22  
23  
24  
25  
26  
27  
28  
29  
30  
31

32 In univariate analysis age above 75, diabetes, congestive heart failure, anemia,  
33  
34 chronic renal impairment, ACS at presentation, and total stent length were  
35  
36 strongly correlated with both MACCE and all-cause mortality at 12-month  
37  
38 follow-up. In the Cox regression model including all the above variables,  
39  
40 independent predictors of all-cause mortality were anemia (HR 1.62, 95% CI  
41  
42 1.05 – 2.51,  $p=0.029$ ), ACS at presentation (HR 2.26, 95% CI 1.37 – 3.75,  
43  
44  $p=0.001$ ), chronic renal impairment (HR 2.35, 95% CI 1.52 – 3.65,  $p<0.001$ ),  
45  
46 and diabetes (HR 1.76, 95% CI 1.15 – 2.70,  $p=0.009$ ). In contrast, anemia as a  
47  
48 categorical variable was not an independent predictor of MACCE at 12-months  
49  
50 follow-up unlike age above 75 years (HR 1.7, 95%-CI 1.2-2.4,  $p=0.004$ ),  
51  
52  
53  
54  
55  
56  
57  
58  
59  
60

1  
2  
3 diabetes (HR 1.7, 95%-CI 1.2-2.3, p=0.002), ACS at presentation (HR 1.7,  
4  
5 95%-CI 1.2-2.3, p=0.003), and congestive heart failure (HR 1.5, 95%-CI 1.0-  
6  
7 2.1, p=0.03).

8  
9  
10 We performed the multivariate model also using haemoglobin as a continuous  
11  
12 variable. Independent predictors of all-cause mortality were pre-procedural  
13  
14 haemoglobin (HR 0.82, 95% CI 0.72 – 0.93, p=0.002), ACS at presentation  
15  
16 (HR 2.07, 95% CI 1.25 – 3.45, p=0.005), chronic renal impairment (HR 2.06,  
17  
18 95% CI 1.31 – 3.24, p=0.002), and diabetes (HR 1.75, 95% CI 1.14 – 2.70,  
19  
20 p=0.01) in a Cox regression model including age over 75 years, total stent  
21  
22 length and number of treated vessels as covariates. On the contrary to what  
23  
24 was found when assessing anemia as a categorical variable, haemoglobin as a  
25  
26 continuous variable predicted also MACCE. Independent predictors of  
27  
28 MACCE were pre-procedural haemoglobin (HR 0.89, 95% CI 0.81 – 0.98,  
29  
30 p=0.016), ACS at presentation (HR 1.55, 95% CI 1.10 – 2.18, p=0.012),  
31  
32 congestive heart failure (HR 1.45, 95% CI 1.03 – 2.04, p=0.035), age over 75  
33  
34 years (HR 1.77, 95%CI 1.27 – 2.45, p=0.001) and diabetes (HR 1.55, 95% CI  
35  
36 1.13 – 2.13, p=0.007) in a Cox regression model including also total stent  
37  
38 length, chronic renal impairment and number of treated vessels as covariates.  
39  
40  
41  
42  
43  
44  
45  
46  
47  
48  
49

50  
51 When the anemic patients were analysed separately in the Cox  
52  
53 regression model, age over 75 years and ACS at presentation were identified as  
54  
55 independent predictors of MACCE at 12-months; and chronic renal  
56  
57  
58  
59  
60

1  
2  
3 impairment, age over 75 years and ACS at presentation as independent  
4  
5 predictors of all-cause mortality  
6  
7

8  
9 Among 861 patients with available preprocedural measurement of  
10  
11 haemoglobin concentration, 26 (2.8%) had severe anemia (defined as  
12  
13 haemoglobin below 10 g/dl). In this subgroup, MACCE occurred in 12 (46.2%)  
14  
15 patients, 10 (38.5%) patients died, and 8 (30.8%) experienced a BARC 2-5  
16  
17 bleeding episode. At discharge, triple therapy was prescribed in 18 (69.2%)  
18  
19 patients, dual anti-platelet therapy in 8 (30.8%), and no patient was prescribed  
20  
21 vitamin K antagonists plus a single anti-platelet drug. Proton pump inhibitors  
22  
23 were prescribed at discharge in 18 (69.2%) patients, and one (3.8%) patient had  
24  
25 a history of gastrointestinal bleeding.  
26  
27  
28  
29  
30  
31  
32  
33  
34

## 35 **DISCUSSION**

36  
37 Our study is the first report on the impact of anemia on the long-term clinical  
38  
39 outcome of patients with AF undergoing PCI. The AFCAS registry represent a  
40  
41 real-life cohort of high-risk AF-patients requiring PCI. The results of the  
42  
43 current study showing that 30% of the patients were anemic confirm the  
44  
45 previous reports that anemia is a frequent finding in real-world patients with  
46  
47 AF referred for PCI.[6-9,14] Anemic patients in the AFCAS registry were older  
48  
49 with more comorbidities, and presented more often with ACS, compared with  
50  
51 non-anemic patients, as also reported in previous cohorts.[6,7,9,14].  
52  
53  
54  
55  
56  
57  
58  
59  
60

1  
2  
3  
4  
5  
6 Overall, the 12-month clinical outcome was worse in anemic patients. Anemia  
7  
8 remained an independent predictor of all-cause mortality in multivariate  
9  
10 analysis. The higher rate of all-cause mortality might be related to the higher-  
11  
12 risk profile in anemic patients, as well as the underlying disease causing  
13  
14 anemia. Furthermore, anemic patients had more frequent MACCE at 12  
15  
16 months, primarily driven by higher rates of all-cause mortality, and non-fatal  
17  
18 MI. However, anemia was not an independent predictor of MACCE. The higher  
19  
20 rate of non-fatal MI might be explained, at least in part, by the higher frequency  
21  
22 of ACS at presentation in anemic patients.  
23  
24  
25  
26  
27  
28  
29  
30  
31

32 The estimated thromboembolic risk of anemic patients according to CHADS<sub>2</sub>  
33  
34 score was higher. However, no excess in TIA or stroke was seen during the  
35  
36 follow-up and only a trend towards more bleeding was observed. This is  
37  
38 contradictory to previous studies have reported a higher incidence of cardiac  
39  
40 and cerebrovascular thrombotic events at long-term follow-up in anemic versus  
41  
42 non-anemic patients in various patient cohorts referred for PCI.[7,9,14-18] The  
43  
44 relatively small number of complications in our patient cohort might explain  
45  
46 this difference.  
47  
48  
49  
50  
51  
52  
53  
54  
55  
56  
57  
58  
59  
60

1  
2  
3 The estimated bleeding risk according to the HAS-BLED score was higher in  
4  
5 anemic patients, but there was only a trend towards increased risk of major  
6  
7 bleeding. However, the results of the current study support the previous reports  
8  
9 on the increased bleeding risk associated with anemia in various patient groups  
10  
11 undergoing PCI.[8,9,19] Anemia may be a marker and consequence of an  
12  
13 underlying condition such as bleeding diathesis, occult gastrointestinal  
14  
15 bleeding, or malignancy that augments the bleeding risk. An interesting  
16  
17 observation is that neither the presence of anemia nor higher estimated bleeding  
18  
19 risk seemed to affect the clinician's choice of antithrombotic medications at  
20  
21 discharge. In view of our results, patients with anemia tolerated triple therapy  
22  
23 surprisingly well with only a trend towards increased bleeding.  
24  
25  
26  
27  
28  
29  
30  
31  
32  
33

34  
35 We observed that the rate of definite or probable stent thrombosis was  
36  
37 significantly higher in anemic versus non-anemic patients ( $p = 0.002$ ). ACS at  
38  
39 presentation may have contributed to the higher rate of stent thrombosis in  
40  
41 anemic patients, as patients with anemia more often presented with ACS versus  
42  
43 those without anemia. Consistent with our results, Pilgrim and co-workers,  
44  
45 observed a higher rate of definite stent thrombosis at 4-year follow-up in  
46  
47 anemic patients who underwent PCI with unrestricted use of drug-eluting  
48  
49 stents, compared with non-anemic ones.[14] Interestingly, in a recent study,  
50  
51 anemia was the only independent predictor of high residual platelet reactivity  
52  
53  
54  
55  
56  
57  
58  
59  
60

1  
2  
3 on clopidogrel in a series of patients undergoing PCI.[20] These observations  
4  
5 warrant further studies to clarify the underlying mechanisms.  
6  
7  
8  
9

10  
11 The effect of anemia on the clinical outcome of PCI appears early during  
12  
13 hospitalization. Kaplan-Meier event-free survival curves in the current study  
14  
15 revealed that most of the thrombotic as well as bleeding events occurred early  
16  
17 (within 30 days) following the index PCI (Figure 1). This finding is in line with  
18  
19 previous reports.[6,8,9,15] In patients with coronary artery disease, anemia  
20  
21 may aggravate myocardial ischemia, and unveil significant coronary  
22  
23 obstruction. Cardiac output increases in patients with anemia in order to  
24  
25 maintain adequate oxygen delivery to the tissues. This increases heart rate and  
26  
27 induces myocardial hypertrophy, which in turn, increases myocardial oxygen  
28  
29 demand, and further exaggerates the myocardial oxygen demand/supply  
30  
31 imbalance.[21] On the other hand, patients with severe anemia receive more  
32  
33 frequent blood transfusion, which was reported to have an adverse impact on  
34  
35 survival after PCI.[22] Unfortunately, information on blood transfusions was  
36  
37 not available in our registry except for the in-hospital phase. More importantly,  
38  
39 anemia is frequently associated with severe underlying chronic diseases which  
40  
41 may compromise long-term survival. Of note is a recent report suggesting that  
42  
43 in patients who underwent PCI with drug-eluting stents, those in whom anemia  
44  
45 improved at follow-up had less MACCE at a median follow-up of 25 months,  
46  
47  
48  
49  
50  
51  
52  
53  
54  
55  
56  
57  
58  
59  
60

1  
2  
3 compared with those with sustained anemia suggesting that a transient cause is  
4  
5 less detrimental than a long-standing state causing anemia, e.g. malignancy.[16]  
6  
7  
8  
9

### 10 **Limitations of the study**

11  
12 The current study has the inherent limitations of the observational study design,  
13  
14 including individual risk-based decision making in treatment choices, which  
15  
16 may introduce selection bias, even though we did not observe any difference  
17  
18 between the two study groups in the antithrombotic treatment prescribed at  
19  
20 discharge. Another possible confounder is the heterogeneity of the AF  
21  
22 population among the participating centers and some differences in the  
23  
24 periprocedural routines. Moreover, the aetiology of anemia was not  
25  
26 systematically investigated; yet, it is beyond the scope of the current study. The  
27  
28 strength of the study is the enrolment of consecutive patients with the only  
29  
30 exclusion criteria being unwillingness/inability to participate in the study. In  
31  
32 this sense the study population represents well real-world patients with AF  
33  
34 referred for PCI.  
35  
36  
37  
38  
39  
40  
41  
42  
43  
44  
45  
46  
47

### 48 **Conclusion**

49  
50 Anemia was a frequent finding in patients with AF referred for PCI. Anemic  
51  
52 patients were older with more frequent comorbidities, and more often presented  
53  
54 with ACS. Anemia seems to be an independent risk factor for all-cause  
55  
56  
57  
58  
59  
60



1  
2  
3 mortality during 12-month follow-up. Anemia is also associated with more  
4  
5  
6 MACCE, and a trend toward a higher rate of bleeding.  
7  
8  
9

## 10 11 **ACKNOWLEDGMENTS**

12  
13  
14 We thank our study coordinator Tuija Vasankari, RN, for her valuable input in  
15  
16 data management.  
17  
18  
19

## 20 21 **COMPETING INTERESTS**

22  
23  
24 The authors declare no competing interests.  
25  
26  
27  
28  
29

## 30 31 **FUNDING**

32  
33 This study was supported by grants from the Finnish Foundation for  
34  
35 Cardiovascular Research, Helsinki, Finland.  
36  
37  
38  
39  
40  
41  
42  
43  
44  
45  
46  
47  
48  
49  
50  
51  
52  
53  
54  
55  
56  
57  
58  
59  
60

**REFERENCES**

1. Rubboli A, Halperin JL, Airaksinen KE, et al. Antithrombotic therapy in patients treated with oral anticoagulation undergoing coronary artery stenting. An expert consensus document with focus on atrial fibrillation. *Ann Med* 2008;40(6):428-36.
2. Rubboli A, Colletta M, Valencia J, et al for the WARfarin, Coronary STENTing (WAR-STENT) Study Group. Periprocedural management and in-hospital outcome of patients with indication for oral anticoagulation undergoing coronary artery stenting. *J Interv Cardiol* 2009;22:390–397.
3. Lip GYH, Huber K, Andreotti F, et al. Antithrombotic management of atrial fibrillation patients presenting with acute coronary syndrome and/or undergoing coronary stenting: executive summary—a Consensus Document of the European Society of Cardiology Working Group on Thrombosis, endorsed by the European Heart Rhythm Association (EHRA) and the European Association of Percutaneous Cardiovascular Interventions (EAPCI). *Eur Heart J* 2010;31:1311-1318.
4. Faxon DP, Eikelboom JW, Berger PB, et al. Consensus Document: Antithrombotic therapy in patients with atrial fibrillation undergoing coronary stenting. A North-American perspective. *Thromb Haemost* 2011;106:522-84.

- 1  
2  
3 5. Rubboli A, Dewilde W, Huber K, et al. The management of patients on oral  
4  
5 anticoagulation undergoing coronary stent implantation: a survey among  
6  
7 interventional cardiologists from eight European countries. *J Interv Cardiol*  
8  
9 2012;25:163-9.  
10
- 11  
12  
13 6. McKechnie RS, Smith D, Montoye C, et al; Blue Cross Blue Shield of  
14  
15 Michigan Cardiovascular Consortium (BMC2). Prognostic implication of  
16  
17 anemia on in-hospital outcomes after percutaneous coronary intervention.  
18  
19 *Circulation* 2004;110(3):271-7.  
20  
21
- 22  
23  
24 7. Nikolsky E, Mehran R, Aymong ED, et al. Impact of anemia on outcomes of  
25  
26 patients undergoing percutaneous coronary interventions. *Am J Cardiol*  
27  
28 2004;94(8):1023-7.  
29  
30
- 31  
32  
33 8. Dündar C, Oduncu V, Erkol A, et al. In-hospital prognostic value of  
34  
35 hemoglobin levels on admission in patients with acute ST segment elevation  
36  
37 myocardial infarction undergoing primary angioplasty. *Clin Res Cardiol*  
38  
39 2012;101(1):37-44.  
40  
41
- 42  
43  
44 9. Ayhan E, Aycicek F, Uyarel H, et al. Patients with anemia on admission  
45  
46 who have undergone primary angioplasty for ST elevation myocardial  
47  
48 infarction: in-hospital and long-term clinical outcomes. *Coron Artery Dis*  
49  
50 2011;22(6):375-9.  
51  
52  
53  
54  
55  
56  
57  
58  
59  
60

- 1  
2  
3 10. Kiviniemi T, Karjalainen P, Rubboli A, et al. Thrombocytopenia in patients  
4  
5 with atrial fibrillation on oral anticoagulation undergoing percutaneous  
6  
7 coronary intervention. *Am J Cardiol* 2013 Aug 15;112(4):493-8.  
8  
9
- 10  
11 11. Schlitt A, Rubboli A, Lip GY, et al; for the AFCAS (Management of  
12  
13 patients with Atrial Fibrillation undergoing Coronary Artery Stenting Study  
14  
15 Group). The management of patients with atrial fibrillation undergoing  
16  
17 percutaneous coronary intervention with stent implantation: In-hospital-data  
18  
19 from the atrial fibrillation undergoing coronary artery stenting study.  
20  
21 *Catheter Cardiovasc Interv* 2013;82(7):E864-70  
22  
23
- 24  
25 12. Mehran R, Rao SV, Bhatt DL, et al. Standardized bleeding definitions for  
26  
27 cardiovascular clinical trials: a consensus report from the bleeding academic  
28  
29 research consortium, *Circulation* 2011;123:2736-2747.  
30  
31  
32
- 33  
34 13. Nutritional anaemias. Report of a WHO scientific group. *World Health*  
35  
36 *Organ Tech* 1968;405:5–32.  
37  
38
- 39  
40 14. Pilgrim T, Vetterli F, Kalesan B, et al. The impact of anemia on long-term  
41  
42 clinical outcome in patients undergoing revascularization with the  
43  
44 unrestricted use of drug-eluting stents. *Circ Cardiovasc Interv.*  
45  
46 2012;5(2):202-10.  
47  
48
- 49  
50 15. Lee PC, Kini AS, Ahsan C, et al. Anemia is an independent predictor of  
51  
52 mortality after percutaneous coronary intervention. *J Am Coll Cardiol*  
53  
54 2004;44(3):541-6.  
55  
56  
57  
58  
59  
60

- 1  
2  
3 16.Kim TH, Koh YS, Chang K, et al; CathOlic university of Korea –  
4  
5 percutAneous Coronary inTervention registry investigators. Improved  
6  
7 anemia is associated with favorable long-term clinical outcomes in patients  
8  
9 undergoing PCI. *Coron Artery Dis* 2012;23(6):391-9.  
10  
11  
12  
13 17.Kitai Y, Ozasa N, Morimoto T, et al; on behalf of the CREDO-Kyoto  
14  
15 registry investigators. Prognostic implications of anemia with or without  
16  
17 chronic kidney disease in patients undergoing elective percutaneous  
18  
19 coronary intervention. *Int J Cardiol* 2013;168(6):5221-8.  
20  
21  
22  
23 18.Hosseini SK, Ansari MJ, Lotfi Tokaldany M, et al. Association between  
24  
25 preprocedural hemoglobin level and 1-year outcome of elective  
26  
27 percutaneous coronary intervention. *J Cardiovasc Med.* 2013 Feb 15. [Epub  
28  
29 ahead of print]  
30  
31  
32  
33 19.Manzano-Fernández S, Pastor FJ, Marín F, et al. Increased major bleeding  
34  
35 complications related to triple antithrombotic therapy usage in patients with  
36  
37 atrial fibrillation undergoing percutaneous coronary artery stenting. *Chest*  
38  
39 2008;134(3):559-67.  
40  
41  
42  
43 20.Toma C, Zahr F, Moguilanski D, et al. Impact of anemia on platelet  
44  
45 response to clopidogrel in patients undergoing percutaneous coronary  
46  
47 stenting. *Am J Cardiol* 2012;109(8):1148-53.  
48  
49  
50  
51  
52  
53  
54  
55  
56  
57  
58  
59  
60

1  
2  
3 21.Foley RN, Parfrey PS, Hamett JD, et al. The impact of anemia on  
4  
5 cardiomyopathy, morbidity, and mortality in end-stage renal disease. Am J  
6  
7 Kidney Dis 1996;28:53– 61.  
8  
9

10  
11 22.Maluenda G, Lemesle G, Ben-Dor I, et al. Value of blood transfusion in  
12  
13 patients with a blood hematocrit of 24% to 30% after percutaneous coronary  
14  
15 intervention. Am J Cardiol 2009;104:1069 –1073.  
16  
17  
18  
19  
20  
21  
22  
23  
24  
25  
26  
27  
28  
29  
30  
31  
32  
33  
34  
35  
36  
37  
38  
39  
40  
41  
42  
43  
44  
45  
46  
47  
48  
49  
50  
51  
52  
53  
54  
55  
56  
57  
58  
59  
60

**FIGURE LEGENDS**

Figure 1 Kaplan-Meier survival curves for the occurrence of adverse events in anemic (dotted lines) versus non-anemic (solid line) patients at 2-month follow-up: all-cause mortality (a), MACCE free survival (b) and bleeding event free survival (c)

For peer review only

1  
2  
3  
4  
5  
6  
7  
8  
9  
10  
11  
12  
13  
14  
15  
16  
17  
18  
19  
20  
21  
22  
23  
24  
25  
26  
27  
28  
29  
30  
31  
32  
33  
34  
35  
36  
37  
38  
39  
40  
41  
42  
43  
44  
45  
46  
47  
48  
49  
50  
51  
52  
53  
54  
55  
56  
57  
58  
59  
60

For peer review only



1  
2  
3  
4  
5  
6  
7  
8  
9  
10  
11  
12  
13  
14  
15  
16  
17  
18  
19  
20  
21  
22  
23  
24  
25  
26  
27  
28  
29  
30  
31  
32  
33  
34  
35  
36  
37  
38  
39  
40  
41  
42  
43  
44  
45  
46  
47  
48  
49  
50  
51  
52  
53  
54  
55  
56  
57  
58  
59  
60

For peer review only

1  
2  
3  
4  
5  
6  
7  
8  
9  
10  
11  
12  
13  
14  
15  
16  
17  
18  
19  
20  
21  
22  
23  
24  
25  
26  
27  
28  
29  
30  
31  
32  
33  
34  
35  
36  
37  
38  
39  
40  
41  
42  
43  
44  
45  
46  
47  
48  
49  
50  
51  
52  
53  
54  
55  
56  
57  
58  
59  
60

For peer review only

1  
2  
3  
4  
5  
6  
7  
8  
9  
10  
11  
12  
13  
14  
15  
16  
17  
18  
19  
20  
21  
22  
23  
24  
25  
26  
27  
28  
29  
30  
31  
32  
33  
34  
35  
36  
37  
38  
39  
40  
41  
42  
43  
44  
45  
46  
47  
48  
49  
50  
51  
52  
53  
54  
55  
56  
57  
58  
59  
60

For peer review only

1  
2  
3  
4  
5  
6  
7  
8  
9  
10  
11  
12  
13  
14  
15  
16  
17  
18  
19  
20  
21  
22  
23  
24  
25  
26  
27  
28  
29  
30  
31  
32  
33  
34  
35  
36  
37  
38  
39  
40  
41  
42  
43  
44  
45  
46  
47  
48  
49  
50  
51  
52  
53  
54  
55  
56  
57  
58  
59  
60

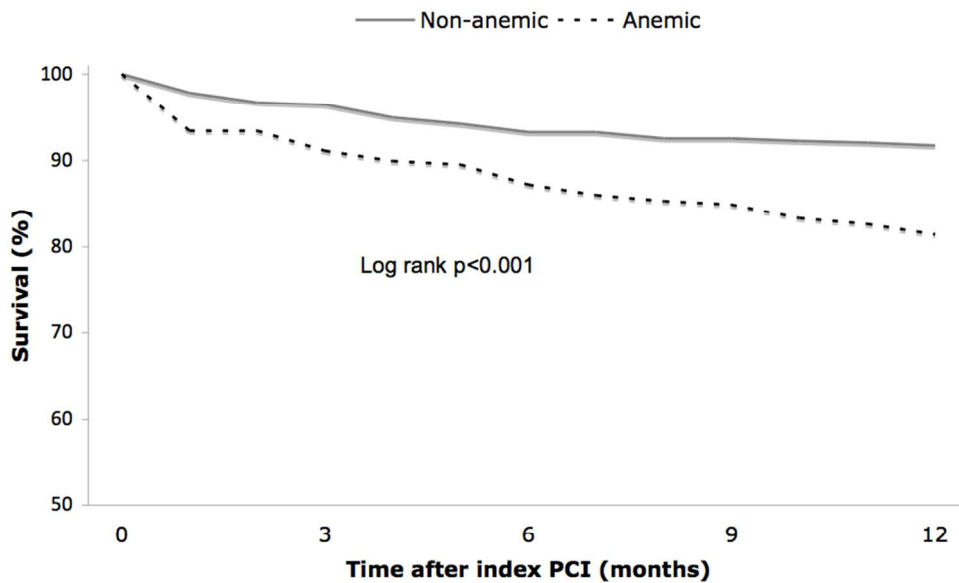

| Patients at risk |     | 0   | 3   | 6   | 9   | 12 |
|------------------|-----|-----|-----|-----|-----|----|
| Non-anemic       | 603 | 581 | 562 | 558 | 553 |    |
| Anemic           | 258 | 235 | 225 | 219 | 210 |    |

Figure 1a

view only

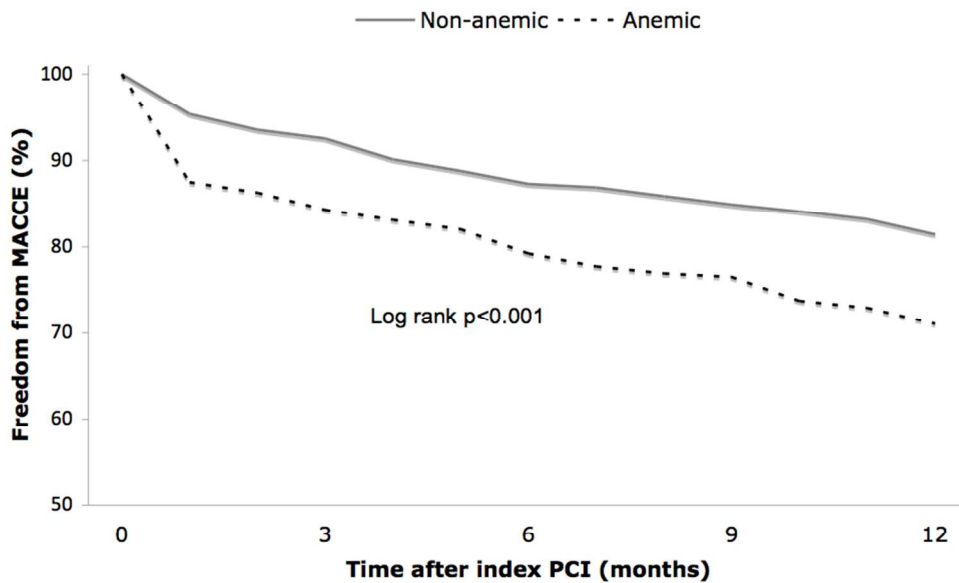

| Patients at risk |     | 0   | 3   | 6   | 9   | 12 |
|------------------|-----|-----|-----|-----|-----|----|
| Non-anemic       | 603 | 552 | 521 | 507 | 486 |    |
| Anemic           | 258 | 215 | 202 | 195 | 181 |    |

Figure 1b

view only

1  
2  
3  
4  
5  
6  
7  
8  
9  
10  
11  
12  
13  
14  
15  
16  
17  
18  
19  
20  
21  
22  
23  
24  
25  
26  
27  
28  
29  
30  
31  
32  
33  
34  
35  
36  
37  
38  
39  
40  
41  
42  
43  
44  
45  
46  
47  
48  
49  
50  
51  
52  
53  
54  
55  
56  
57  
58  
59  
60

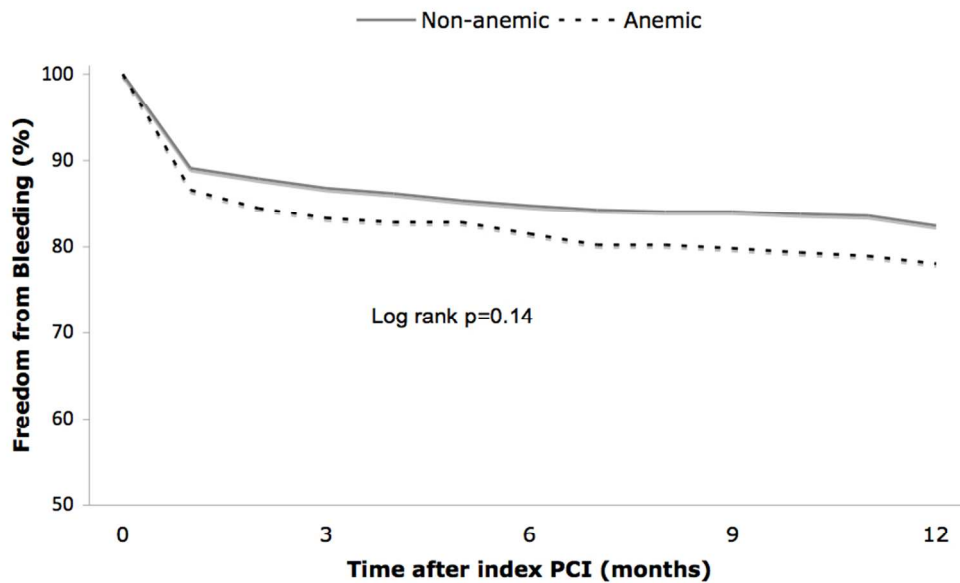

| Patients at risk |     |     |     |     |     |
|------------------|-----|-----|-----|-----|-----|
| Non-anemic       | 603 | 507 | 485 | 476 | 463 |
| Anemic           | 258 | 197 | 187 | 180 | 169 |

Figure 1c

view only

**Table 1.** Bleeding Academic Research Consortium Definition for Bleeding.

|                |                                                                                                                                                                                                                                                                                                                                                                                                                                                               |
|----------------|---------------------------------------------------------------------------------------------------------------------------------------------------------------------------------------------------------------------------------------------------------------------------------------------------------------------------------------------------------------------------------------------------------------------------------------------------------------|
| <b>Type 2</b>  | any overt, actionable sign of hemorrhage (eg, more bleeding than would be expected for a clinical circumstance, including bleeding found by imaging alone) that does not fit the criteria for type 3, 4, or 5 but does meet at least one of the following criteria:<br><br>(1) requiring nonsurgical, medical intervention by a healthcare professional,<br><br>(2) leading to hospitalization or increased level of care, or<br><br>(3) prompting evaluation |
| <b>Type 3a</b> | Overt bleeding plus hemoglobin drop of 3 to 5 g/dL* (provided hemoglobin drop is related to bleed)<br><br>Any transfusion with overt bleeding                                                                                                                                                                                                                                                                                                                 |
| <b>Type 3b</b> | Overt bleeding plus hemoglobin drop >5 g/dL* (provided hemoglobin drop is related to bleed)<br><br>Cardiac tamponade<br><br>Bleeding requiring surgical intervention for control (excluding dental/nasal/skin/hemorrhoid)<br><br>Bleeding requiring intravenous vasoactive agents                                                                                                                                                                             |
| <b>Type 3c</b> | Intracranial hemorrhage (does not include microbleeds or hemorrhagic transformation, does include intraspinal)<br><br>Subcategories confirmed by autopsy or imaging or lumbar puncture<br><br>Intraocular bleed compromising vision                                                                                                                                                                                                                           |
| <b>Type 5</b>  | fatal bleeding                                                                                                                                                                                                                                                                                                                                                                                                                                                |

Type 1 and type 4 (coronary bypass related) bleeding events were not included in the analysis.

**Online Table 2** Bleeding events at 12-month follow-up in the two study subgroups

| Endpoints            | Anemia (N=258) | Non-anemic<br>(N=603) | <i>p</i> value |
|----------------------|----------------|-----------------------|----------------|
| BARC 2               | 22 (8.5)       | 48 (8.0)              | 0.786          |
| BARC 3a bleeding     | 18 (7.0)       | 20 (3.3)              | 0.028          |
| BARC 3b bleeding     | 10 (3.9)       | 22 (3.6)              | 0.846          |
| BARC 3c bleeding     | 0 (0)          | 9 (1.5)               | 0.064          |
| BARC 5 bleeding      | 4 (1.6)        | 5 (0.8)               | 0.464          |
| Total adverse events | 111 (43.0)     | 190 (31.5)            | 0.001          |

Variables are presented as frequency (percentage).

BARC indicates Bleeding Academic Research Consortium.



STROBE Statement—Checklist of items that should be included in reports of *cohort studies*

|                              | Item No | Recommendation                                                                                                                                                                                                                                                                                                                  |
|------------------------------|---------|---------------------------------------------------------------------------------------------------------------------------------------------------------------------------------------------------------------------------------------------------------------------------------------------------------------------------------|
| <b>Title and abstract</b>    | 1       | (a) Indicate the study's design with a commonly used term in the title or the abstract ok<br>(b) Provide in the abstract an informative and balanced summary of what was done and what was found ok                                                                                                                             |
| <b>Introduction</b>          |         |                                                                                                                                                                                                                                                                                                                                 |
| Background/rationale         | 2       | Explain the scientific background and rationale for the investigation being reported ok                                                                                                                                                                                                                                         |
| Objectives                   | 3       | State specific objectives, including any prespecified hypotheses ok                                                                                                                                                                                                                                                             |
| <b>Methods</b>               |         |                                                                                                                                                                                                                                                                                                                                 |
| Study design                 | 4       | Present key elements of study design early in the paper ok                                                                                                                                                                                                                                                                      |
| Setting                      | 5       | Describe the setting, locations, and relevant dates, including periods of recruitment, exposure, follow-up, and data collection ok                                                                                                                                                                                              |
| Participants                 | 6       | (a) Give the eligibility criteria, and the sources and methods of selection of participants. Describe methods of follow-up ok<br>(b) For matched studies, give matching criteria and number of exposed and unexposed                                                                                                            |
| Variables                    | 7       | Clearly define all outcomes, exposures, predictors, potential confounders, and effect modifiers. Give diagnostic criteria, if applicable ok                                                                                                                                                                                     |
| Data sources/<br>measurement | 8*      | For each variable of interest, give sources of data and details of methods of assessment (measurement). Describe comparability of assessment methods if there is more than one group                                                                                                                                            |
| Bias                         | 9       | Describe any efforts to address potential sources of bias                                                                                                                                                                                                                                                                       |
| Study size                   | 10      | Explain how the study size was arrived at                                                                                                                                                                                                                                                                                       |
| Quantitative variables       | 11      | Explain how quantitative variables were handled in the analyses. If applicable, describe which groupings were chosen and why ok                                                                                                                                                                                                 |
| Statistical methods          | 12      | (a) Describe all statistical methods, including those used to control for confounding ok<br>(b) Describe any methods used to examine subgroups and interactions ok<br>(c) Explain how missing data were addressed ok<br>(d) If applicable, explain how loss to follow-up was addressed<br>(e) Describe any sensitivity analyses |
| <b>Results</b>               |         |                                                                                                                                                                                                                                                                                                                                 |
| Participants                 | 13*     | (a) Report numbers of individuals at each stage of study—eg numbers potentially eligible, examined for eligibility, confirmed eligible, included in the study, completing follow-up, and analysed ok<br>(b) Give reasons for non-participation at each stage<br>(c) Consider use of a flow diagram                              |
| Descriptive data             | 14*     | (a) Give characteristics of study participants (eg demographic, clinical, social) and information on exposures and potential confounders ok<br>(b) Indicate number of participants with missing data for each variable of interest ok<br>(c) Summarise follow-up time (eg, average and total amount) ok                         |
| Outcome data                 | 15*     | Report numbers of outcome events or summary measures over time ok                                                                                                                                                                                                                                                               |
| Main results                 | 16      | (a) Give unadjusted estimates and, if applicable, confounder-adjusted estimates and their precision (eg, 95% confidence interval). Make clear which confounders were adjusted for and why they were included ok                                                                                                                 |

|                          |    |                                                                                                                                                                               |
|--------------------------|----|-------------------------------------------------------------------------------------------------------------------------------------------------------------------------------|
|                          |    | (b) Report category boundaries when continuous variables were categorized ok                                                                                                  |
|                          |    | (c) If relevant, consider translating estimates of relative risk into absolute risk for a meaningful time period                                                              |
| Other analyses           | 17 | Report other analyses done—eg analyses of subgroups and interactions, and sensitivity analyses ok                                                                             |
| <b>Discussion</b>        |    |                                                                                                                                                                               |
| Key results              | 18 | Summarise key results with reference to study objectives ok                                                                                                                   |
| Limitations              | 19 | Discuss limitations of the study, taking into account sources of potential bias or imprecision. Discuss both direction and magnitude of any potential bias ok                 |
| Interpretation           | 20 | Give a cautious overall interpretation of results considering objectives, limitations, multiplicity of analyses, results from similar studies, and other relevant evidence ok |
| Generalisability         | 21 | Discuss the generalisability (external validity) of the study results ok                                                                                                      |
| <b>Other information</b> |    |                                                                                                                                                                               |
| Funding                  | 22 | Give the source of funding and the role of the funders for the present study and, if applicable, for the original study on which the present article is based ok              |

\*Give information separately for exposed and unexposed groups.

**Note:** An Explanation and Elaboration article discusses each checklist item and gives methodological background and published examples of transparent reporting. The STROBE checklist is best used in conjunction with this article (freely available on the Web sites of PLoS Medicine at <http://www.plosmedicine.org/>, Annals of Internal Medicine at <http://www.annals.org/>, and Epidemiology at <http://www.epidem.com/>). Information on the STROBE Initiative is available at <http://www.strobe-statement.org>.

# BMJ Open

## Impact of anemia on clinical outcome in patients with atrial fibrillation undergoing percutaneous coronary intervention: insights from the AFCAS registry

|                                 |                                                                                                                                                                                                                                                                                                                                                                                                                                                                                                                                                                                                                                                                                             |
|---------------------------------|---------------------------------------------------------------------------------------------------------------------------------------------------------------------------------------------------------------------------------------------------------------------------------------------------------------------------------------------------------------------------------------------------------------------------------------------------------------------------------------------------------------------------------------------------------------------------------------------------------------------------------------------------------------------------------------------|
| Journal:                        | <i>BMJ Open</i>                                                                                                                                                                                                                                                                                                                                                                                                                                                                                                                                                                                                                                                                             |
| Manuscript ID:                  | bmjopen-2013-004700.R2                                                                                                                                                                                                                                                                                                                                                                                                                                                                                                                                                                                                                                                                      |
| Article Type:                   | Research                                                                                                                                                                                                                                                                                                                                                                                                                                                                                                                                                                                                                                                                                    |
| Date Submitted by the Author:   | 21-Apr-2014                                                                                                                                                                                                                                                                                                                                                                                                                                                                                                                                                                                                                                                                                 |
| Complete List of Authors:       | Puurunen, Marja; Finnish Red Cross Blood Service, Laboratory of Hemostasis<br>Kiviniemi, Tuomas; Turku University Hospital, Heart Center<br>Nammass, Wail; Turku University Hospital, Heart Center<br>Schlitt, Axel; Martin Luther University Halle-Wittenberg, Medical Faculty<br>Rubboli, Andrea; Ospedale Maggiore, Division of Cardiology<br>Nyman, Kai; Central Finland Central Hospital, Department of Cardiology<br>Karjalainen, Pasi; Satakunta Central Hospital, Heart Center<br>Kirchhof, Paulus; University of Birmingham, Centre for Cardiovascular Sciences<br>Lip, Gregory; University Department of Medicine,<br>Airaksinen, Juhani; Turku University Hospital, Heart Center |
| <b>Primary Subject Heading</b>: | Cardiovascular medicine                                                                                                                                                                                                                                                                                                                                                                                                                                                                                                                                                                                                                                                                     |
| Secondary Subject Heading:      | Haematology (incl blood transfusion)                                                                                                                                                                                                                                                                                                                                                                                                                                                                                                                                                                                                                                                        |
| Keywords:                       | HAEMATOLOGY, CARDIOLOGY, Coronary intervention < CARDIOLOGY, Anaemia < HAEMATOLOGY, Anticoagulation < HAEMATOLOGY                                                                                                                                                                                                                                                                                                                                                                                                                                                                                                                                                                           |
|                                 |                                                                                                                                                                                                                                                                                                                                                                                                                                                                                                                                                                                                                                                                                             |

SCHOLARONE™  
Manuscripts

1  
2  
3  
4 **Impact of anemia on clinical outcome in patients with atrial fibrillation**  
5  
6 **undergoing percutaneous coronary intervention: insights from the AFCAS**  
7  
8 **registry**  
9  
10

11  
12  
13  
14 **Puurunen Marja\***, **Kiviniemi Tuomas†**, **Nammas Wail†**, **Schlitt Axel ‡**, **Rubboli**

15 **Andrea§**, **Nyman Kai#**, **Karjalainen Pasi¶**, **Kirchhof Paulus††,\*\***, **Lip Gregory YH††**,

16  
17  
18  
19 **Airaksinen KE Juhani†**  
20

21 \* Hemostasis laboratory, Finnish Red Cross Blood Service, Helsinki, Finland

22 †Heart Center, Turku University Hospital and University of Turku, Turku, Finland;

23 ‡Medical Faculty, Martin Luther University Halle-Wittenberg, Halle-Wittenberg, Germany;

24 §Division of Cardiology, Laboratory of Interventional Cardiology, Ospedale Maggiore,  
25 Bologna, Italy;

26 #Department of Cardiology, Central Finland Central Hospital, Jyväskylä, Finland;

27 ¶Heart Center, Satakunta Central Hospital, Pori, Finland;

28 \*\* Department of Cardiovascular Medicine, Hospital of the University of Münster, Münster,  
29 Germany  
30

31 ††University of Birmingham Centre for Cardiovascular Sciences, City Hospital, Birmingham,  
32 United Kingdom  
33

34  
35  
36  
37  
38  
39  
40  
41  
42  
43  
44  
45  
46  
47 **Address for correspondence:** Dr. K. E. Juhani Airaksinen, Heart Center, Turku University  
48 Hospital, Kiinamylynkatu 4-8, FIN-20520 Turku, Finland.

49  
50  
51  
52 Email: juhani.airaksinen@tyks.fi  
53

54 **Word count** (excluding title page, abstract, tables, figures and references) 2751  
55  
56  
57  
58  
59  
60

## ABSTRACT

**Objectives:** Anemia has an adverse impact on the outcome in the general patient population undergoing percutaneous coronary intervention (PCI). The aim of this study was to analyze the impact of anemia on the 12-month clinical outcome of patients with atrial fibrillation (AF) undergoing PCI and therefore requiring intense antithrombotic treatment. We hypothesized that anemia might be associated with a worse outcome and more bleeding in these anticoagulated patients.

**Setting:** Data was collected from 17 secondary care centers in Europe.

**Participants:** Consecutive patients with AF undergoing PCI were enrolled in the prospective, multicenter AFCAS (Atrial Fibrillation undergoing Coronary Artery Stenting) registry. Altogether 929 patients participated in the study. Preprocedural haemoglobin concentration was available for 861 (92.7%) (30% female). Only exclusion criteria were inability or unwillingness to give informed consent. Anemia was defined as a haemoglobin concentration of <12 g/dl for women, and <13 g/dl for men.

**Outcome measures:** The primary endpoint was occurrence of major adverse cardiac and cerebrovascular events (MACCE) or bleeding events.

**Results:** 258/861 (30%) patients had anemia. Anemic patients were older, had more often diabetes, higher CHA<sub>2</sub>DS<sub>2</sub>-VASc score, prior history of heart

1  
2  
3 failure, chronic renal impairment, and acute coronary syndrome. Anemic  
4  
5 patients had more MACCE than non-anemic (29.1% versus 19.4%,  
6  
7 respectively,  $p=0.002$ ), and minor bleeding events (7.0% versus 3.3%,  
8  
9 respectively,  $p=0.028$ ), with a trend toward more total bleeding events (25.2%  
10  
11 versus 21.7%, respectively,  $p=0.059$ ). No difference was observed in  
12  
13 antithrombotic regimens at discharge. In multivariate analysis anemia was an  
14  
15 independent predictor of all-cause mortality at 12-months follow-up (HR 1.62,  
16  
17 95% CI 1.05 – 2.51,  $p=0.029$ ).  
18  
19  
20  
21  
22  
23

24 **Conclusions:** Anemia was a frequent finding in patients with AF referred for  
25  
26 PCI. Anemic patients had a higher all-cause mortality, more thrombotic events,  
27  
28 and minor bleeding events. Anemia seems to identify patients at risk for  
29  
30 cardiovascular events and death.  
31  
32  
33

34  
35 **Trial registration:** ClinicalTrials.gov number NCT00596570  
36  
37  
38  
39

40 **Keywords:** atrial fibrillation, percutaneous coronary intervention, anemia  
41  
42  
43  
44  
45

#### 46 **Strengths and limitations of the study:**

- 47  
48 - The strength of the study is the enrolment of consecutive patients with  
49  
50 the only exclusion criteria being unwillingness/inability to participate in  
51  
52 the study. In this sense the study population represents well real-world  
53  
54 patients with AF referred for PCI.  
55  
56  
57  
58  
59  
60

- The study adds to our knowledge on the prevalence and impact of anemia in AF patients undergoing PCI and thus requiring combination antithrombotic medication. It shows that anemia is a frequent finding and that even mild anemia has an adverse impact on outcome.
- The current study has the inherent limitations of the observational study design, including individual risk-based decision making in treatment choices, which may introduce selection bias. Another possible confounder is the heterogeneity of the AF population among the participating centers and some differences in the periprocedural routines.
- The aetiology of anemia could not be systematically investigated and is therefore out of the scope of this study.

## INTRODUCTION

It is estimated that around 5% of patients undergoing percutaneous coronary intervention (PCI) need long-term oral anticoagulation (OAC) due to atrial fibrillation (AF).[1,2] Yet, the current recommendations on the management of antithrombotic treatment in patients with AF undergoing PCI and stenting are mainly derived from small studies, amounting to a weak level of evidence.[3,4] Moreover, the real-world management of patients on OAC undergoing PCI is variable, and only partially adherent to the current recommendations.[5]

Defined according to the World Health Organization (WHO), anemia has been reported to affect nearly 25% of patients undergoing PCI and stenting. Anemic patients undergoing PCI are generally older with more comorbidities, and have higher rates of in-hospital mortality and major adverse cardiac and cerebrovascular events (MACCE), as well as 1-year mortality.[6,7] Furthermore, low admission haemoglobin level was found to be an independent predictor of in-hospital and long-term mortality, and was associated with higher rates of in-hospital minor and major bleeding events in patients undergoing primary PCI for ST-segment elevation myocardial infarction (MI).[8,9]

However, little is known about the effect of anemia on the outcome of patients with AF undergoing PCI and thus requiring intensive antithrombotic treatment. Anemia is possibly a marker of high bleeding risk, which could be aggravated by the underlying cause. Therefore, we analyzed data from the



1  
2  
3 prospective AFCAS (Atrial Fibrillation undergoing Coronary Artery Stenting)  
4  
5 registry to explore the impact of anemia on the 12-month clinical outcome of  
6  
7 patients with AF undergoing PCI.[10]  
8  
9

## 10 11 12 13 **METHODS**

### 14 15 **Patients**

16  
17 The AFCAS registry (ClinicalTrials.gov number NCT00596570)  
18  
19 is a prospective, multicenter registry that enrolled patients with AF referred for  
20  
21 PCI in 5 European countries. The study design has been described in detail  
22  
23 previously.[11] Patients were enrolled if they had: 1) history of AF  
24  
25 (paroxysmal, persistent, or permanent), or 2) on-going AF during the index  
26  
27 PCI. Out of the 929 participants 861 (92.7%) had a preprocedural haemoglobin  
28  
29 count available and were included in this analysis.  
30  
31  
32  
33  
34  
35  
36  
37  
38  
39

40  
41 Coronary angiography and PCI were performed via either radial or femoral  
42  
43 access, and hemostasis was achieved according to local practice. Coronary  
44  
45 lesions were treated according to contemporary interventional techniques. Low-  
46  
47 molecular-weight heparin (enoxaparin sodium, dalteparin), unfractionated  
48  
49 heparin, bivalirudin, and glycoprotein IIb/IIIa inhibitors were administered at  
50  
51 the operator's discretion. The post-discharge medication was completely at the  
52  
53 discretion of the treating physician.  
54  
55  
56  
57  
58  
59  
60

1  
2  
3  
4  
5  
6 The primary endpoints of the current study were 1) occurrence of MACCE  
7  
8 defined as a composite of all-cause mortality, any non-fatal MI, any  
9  
10 revascularization, definite/probable stent thrombosis, transient ischemic attack  
11  
12 (TIA) or stroke, and peripheral arterial embolism; 2) bleeding events; and 3)  
13  
14 total adverse events (a composite of MACCE plus bleeding events). Bleeding  
15  
16 events were defined according to the Bleeding Academic Research Consortium  
17  
18 (BARC) criteria as minor (BARC 2), and major (BARC 3a, 3b, 3c and 5)  
19  
20 bleeding events; however, CABG-related bleeding was excluded.[12] (Web  
21  
22 Table 1)  
23  
24  
25  
26  
27  
28  
29  
30  
31

32 Anemia was defined as a haemoglobin concentration of <12 g/dl for women,  
33  
34 and <13 g/dl for men, according to the definition of the WHO.[13] Chronic  
35  
36 renal impairment was defined by an estimated glomerular filtration rate below  
37  
38 60 ml/min.  
39  
40  
41  
42  
43  
44

### 45 **Ethical aspects**

46  
47  
48 The study was initiated by the investigators and conducted according to the  
49  
50 ethical guidelines of the 1964 Declaration of Helsinki, as revised in 2002.  
51  
52  
53 Informed written consent was obtained from every patient after full explanation  
54  
55  
56  
57  
58  
59  
60

of the study protocol. The study protocol was approved by the ethics committees of the participating centers.

### Statistical analysis

For analysis patients with available preprocedural measurement of haemoglobin concentration were divided into two subgroups: anemic patients, and control patients without anemia. Continuous variables were reported as the mean  $\pm$  standard deviation if normally distributed, and as median [inter-quartile range (IQR)] if they were skewed. Data were tested for normal distribution using the Kolmogorov-Smirnov and Shapiro-Wilk tests. Categorical variables were described with absolute and relative (percentage) frequencies. Comparisons between the two study subgroups were performed using the unpaired *t*-test or Mann-Whitney test for continuous variables, and Pearson  $\chi^2$  or Fisher's exact test for categorical variables, as appropriate. Cox regression hazard model was used to identify the independent predictors of MACCE, and all-cause mortality at 12-month follow-up. Baseline variables correlating at  $p < 0.10$  level with the dependent variable in univariate analyses were entered in the Cox regression model as covariates. Cox regression hazard model was used to identify the independent predictors of MACCE, and all-cause mortality at 12-month follow-up in the subgroup of anemic patients. Finally we constructed Kaplan-Meier survival curves to display the time-to-event relationship for the occurrence of

1  
2  
3 all-cause mortality, MACCE, and all bleeding events. Statistical analysis was  
4  
5 performed using SPSS statistical software (SPSS v. 16.0.1, SPSS Inc., Chicago,  
6  
7 Ill., USA).  
8  
9

## 10 11 12 13 **RESULTS**

### 14 15 **Baseline characteristics**

16  
17  
18 Out of 929 patients enrolled in the AFCAS registry and followed up for 12  
19  
20 months, 861 (92.7%) had available preprocedural measurement of haemoglobin  
21  
22 concentration, of whom 258 (30%) had anemia and 603 (70%) had normal  
23  
24 haemoglobin concentration. Anemic patients were older, more likely to have  
25  
26 diabetes mellitus, hypertension, history of heart failure and chronic renal  
27  
28 impairment, HAS-BLED score  $\geq 3$ , higher CHA<sub>2</sub>DS<sub>2</sub>VASC score, and more  
29  
30 likely presented with acute coronary syndrome (ACS) as opposed to chronic  
31  
32 stable angina, compared with those without anemia ( $p < 0.05$  for all), as shown  
33  
34 in Table 1. Furthermore, anemic patients had more vessels treated during the  
35  
36 index procedure, and a greater total stent length, compared with those without  
37  
38 anemia ( $p < 0.05$  for both) (Table 2). At discharge, no significant differences  
39  
40 were seen in the prescription of antithrombotic medications in the two study  
41  
42 groups ( $p = 0.15$ ) (Table 3). The duration of clopidogrel treatment did not differ  
43  
44 in anemic versus non-anemic patients on triple therapy (median [IQR]: 3 [11]  
45  
46 versus 3 [5] months,  $p = 0.61$ ), on dual antiplatelet therapy (median [IQR]: 12  
47  
48  
49  
50  
51  
52  
53  
54  
55  
56  
57  
58  
59  
60

[11] versus 12 [11] months,  $p=0.72$ ), or on vitamin K antagonist + clopidogrel (median [IQR]: 12 [11] versus 3 [11] months,  $p=0.65$ ). Proton pump inhibitors were more frequently prescribed to patients with anemia versus those without (47.7 versus 31.3%, respectively,  $p < 0.001$ ).

**Table 1** Baseline clinical characteristics of the two study subgroups

| Variable                       | Anemia (N=258) | Non-anemic (N=603) | <i>p</i> value |
|--------------------------------|----------------|--------------------|----------------|
| Age (yrs)                      | 76 [9]         | 73 [11]            | <0.001         |
| Female gender                  | 89 (34.5)      | 170 (28.2)         | 0.074          |
| Diabetes mellitus              | 119 (46.1)     | 191 (31.7)         | <0.001         |
| Hypercholesterolemia           | 162 (62.8)     | 407 (67.5)         | 0.183          |
| Current or ex-smoking          | 26 (10.1)      | 62 (10.3)          | 1.00           |
| Hypertension                   | 221 (85.7)     | 503 (83.4)         | 0.48           |
| Paroxysmal atrial fibrillation | 103 (39.9)     | 229 (38.0)         | 0.594          |
| Persistent atrial fibrillation | 22 (8.5)       | 78 (12.9)          | 0.081          |
| Permanent atrial fibrillation  | 129 (50)       | 294 (48.8)         | 0.766          |

|    |                                                 |            |            |        |
|----|-------------------------------------------------|------------|------------|--------|
| 1  |                                                 |            |            |        |
| 2  |                                                 |            |            |        |
| 3  |                                                 |            |            |        |
| 4  | CHA <sub>2</sub> DS <sub>2</sub> -VASc score >4 | 148 (57.4) | 235 (39.0) | <0.001 |
| 5  |                                                 |            |            |        |
| 6  | HAS BLED score ≥3                               | 215 (83.3) | 441 (73.1) | 0.001  |
| 7  |                                                 |            |            |        |
| 8  |                                                 |            |            |        |
| 9  | History of peptic ulcer                         | 17 (6.6)   | 27 (4.5)   | 0.236  |
| 10 |                                                 |            |            |        |
| 11 |                                                 |            |            |        |
| 12 | History of cerebral hemorrhage                  | 4 (1.6)    | 6 (1.0)    | 0.497  |
| 13 |                                                 |            |            |        |
| 14 |                                                 |            |            |        |
| 15 | History of GI hemorrhage                        | 9 (3.5)    | 12 (2.0)   | 0.144  |
| 16 |                                                 |            |            |        |
| 17 |                                                 |            |            |        |
| 18 | History of heart failure                        | 69 (26.7)  | 113 (18.7) | 0.011  |
| 19 |                                                 |            |            |        |
| 20 |                                                 |            |            |        |
| 21 | eGFR below 60 ml/min                            | 119 (52.2) | 175 (31.9) | <0.001 |
| 22 |                                                 |            |            |        |
| 23 |                                                 |            |            |        |
| 24 | Prior transient ischemic attacks                | 12 (4.7)   | 30 (5.0)   | 1.00   |
| 25 |                                                 |            |            |        |
| 26 |                                                 |            |            |        |
| 27 |                                                 |            |            |        |
| 28 | Prior stroke                                    | 36 (14.0)  | 67 (11.1)  | 0.252  |
| 29 |                                                 |            |            |        |
| 30 |                                                 |            |            |        |
| 31 | Prior MI                                        | 76 (29.5)  | 146 (24.2) | 0.126  |
| 32 |                                                 |            |            |        |
| 33 |                                                 |            |            |        |
| 34 | Prior PCI                                       | 47 (18.2)  | 100 (16.6) | 0.555  |
| 35 |                                                 |            |            |        |
| 36 |                                                 |            |            |        |
| 37 | Prior coronary bypass surgery                   | 47 (18.2)  | 78 (12.9)  | 0.057  |
| 38 |                                                 |            |            |        |
| 39 |                                                 |            |            |        |
| 40 | Proton pump inhibitors                          | 123 (47.7) | 189 (31.3) | <0.001 |
| 41 |                                                 |            |            |        |
| 42 |                                                 |            |            |        |
| 43 | Stable angina pectoris                          | 81 (31.4)  | 289 (48.0) | <0.001 |
| 44 |                                                 |            |            |        |
| 45 |                                                 |            |            |        |
| 46 | ACS                                             | 177 (68.6) | 313 (52.0) | <0.001 |
| 47 |                                                 |            |            |        |
| 48 |                                                 |            |            |        |
| 49 | Unstable angina pectoris                        | 53 (20.5)  | 107 (17.7) | 0.34   |
| 50 |                                                 |            |            |        |
| 51 |                                                 |            |            |        |
| 52 | Non-ST-elevation MI                             | 83 (32.2)  | 132 (21.9) | 0.002  |
| 53 |                                                 |            |            |        |
| 54 |                                                 |            |            |        |
| 55 | ST-elevation MI                                 | 41 (15.9)  | 74 (12.3)  | 0.156  |
| 56 |                                                 |            |            |        |
| 57 |                                                 |            |            |        |
| 58 |                                                 |            |            |        |
| 59 |                                                 |            |            |        |
| 60 |                                                 |            |            |        |

Continuous variables are presented as median [interquartile range], whereas categorical variables are presented as frequency (percentage).

ACS indicates acute coronary syndrome; eGFR, estimated glomerular filtration rate; GI, gastrointestinal, IQR, inter-quartile range; MI, myocardial infarction; PCI, percutaneous coronary intervention.

**Table 2** Procedural data of the two study subgroups

| Variable                                | Anemia<br>(N=258) | Non-anemic<br>(N=603) | <i>p</i> value |
|-----------------------------------------|-------------------|-----------------------|----------------|
| Femoral access                          | 196 (76.0)        | 435 (72.1)            | 0.275          |
| Number of treated vessels               | 1.22 ± 0.45       | 1.15 ± 0.41           | 0.04           |
| DES                                     | 67 (27.0)         | 138 (23.6)            | 0.293          |
| Peri-procedural INR                     | 1.9 [1]           | 1.88 [1]              | 0.509          |
| Stent diameter (mm)                     | 3 [1]             | 3 [1]                 | 0.965          |
| Total stent length (mm)                 | 20 [18]           | 19 [14]               | 0.014          |
| Procedural success                      | 252 (97.7)        | 582 (96.5)            | 0.085          |
| Hemostasis                              |                   |                       |                |
| Manual compression                      | 112 (43.4)        | 249 (41.3)            | 0.765          |
| Compression device <sup>a</sup>         | 49 (19.0)         | 155 (25.7)            | 0.083          |
| Access-site closure device <sup>b</sup> | 82 (31.8)         | 165 (27.4)            | 0.154          |

Continuous variables are presented as mean  $\pm$  SD or median [interquartile range], whereas categorical variables are presented as frequency (percentage).

<sup>a</sup>FemoStop<sup>®</sup>, pneumatic compression device (Radi medical system, Sweden).

<sup>b</sup>Angioseal<sup>®</sup>, closure device (St. Jude medical, USA).

DES, drug-eluting stents; INR, international normalized ratio; IQR, inter-quartile range.

**Table 3** Prescription of antithrombotic medications at discharge in the two study subgroups

| Variable             | Anemia (N=258) | Non-anemic (N=603) | <i>p</i> value |
|----------------------|----------------|--------------------|----------------|
| Triple therapy       | 181 (70.2)     | 442 (73.3)         | 0.15           |
| DAPT                 | 58 (22.5)      | 100 (16.6)         |                |
| VKA plus clopidogrel | 15 (5.8)       | 51 (8.5)           |                |
| VKA plus aspirin     | 4 (1.6)        | 10 (1.7)           |                |

Variables are presented as frequency (percentage).

VKA indicates vitamin K antagonist; DAPT, dual antiplatelet therapy.

### Clinical outcome

Clinical outcomes at 12-month follow-up are presented in table 4 and figure 1.

The primary endpoint of MACCE was significantly more frequent in anemic patients than those without anemia (29.1 versus 19.4%, respectively,  $p=0.002$ ).

This difference was driven by higher rates of all-cause mortality, non-fatal MI, and definite/probable ST ( $p<0.05$  for all). Anemic patients had more BARC 3a bleeding events (7.0 versus 3.3%, respectively,  $p=0.028$ ). No difference was



1  
2  
3 seen in BARC 5 bleedings. There was a trend toward more total bleeding  
4  
5 events (25.2% in anemic versus 21.7% in controls,  $p=0.059$ ). (For detailed  
6  
7 information on bleeding events see Web Table 2.) Total adverse events  
8  
9 occurred more frequently in anemic versus non-anemic patients (43.0 versus  
10  
11 31.5%, respectively,  $p=0.001$ ).  
12  
13  
14  
15  
16  
17  
18  
19  
20  
21  
22  
23  
24  
25  
26  
27  
28  
29  
30  
31  
32  
33  
34  
35  
36  
37  
38  
39  
40  
41  
42  
43  
44  
45  
46  
47  
48  
49  
50  
51  
52  
53  
54  
55  
56  
57  
58  
59  
60

**Table 4** Clinical outcome at 12-month follow-up in the two study subgroups

| <b>Endpoints</b>                    | <b>Anemia<br/>(N=258)</b> | <b>Non-anemic<br/>(N=603)</b> | <b>p value</b> |
|-------------------------------------|---------------------------|-------------------------------|----------------|
| MACCE                               | 75 (29.1)                 | 117 (19.4)                    | 0.002          |
| All-cause mortality                 | 48 (18.6)                 | 50 (8.3)                      | <0.001         |
| Stroke/TIA                          | 6 (2.3)                   | 17 (2.8)                      | 0.819          |
| Peripheral arterial embolism        | 2 (0.8)                   | 5 (0.8)                       | 1.00           |
| Non-fatal myocardial infarction     | 24 (9.3)                  | 27 (4.5)                      | 0.011          |
| Any revascularization               | 19 (7.4)                  | 51 (8.5)                      | 0.683          |
| Definite/probable stent thrombosis  | 10 (3.9)                  | 4 (0.7)                       | 0.002          |
| Total bleeding events               | 65 (25.2)                 | 131 (21.7)                    | 0.059          |
| Minor bleeding (BARC 2)             | 22 (8.5)                  | 48 (8.0)                      | 0.786          |
| Major bleeding (BARC 3a, 3b, 3c, 5) | 33 (12.8)                 | 56 (9.3)                      | 0.142          |
| Access site complications           | 25 (9.7)                  | 49 (8.1)                      | 0.51           |
| Pseudoaneurysm                      | 7 (2.7)                   | 18 (3.0)                      | 1.0            |
| Red blood cell transfusion          | 10 (3.9)                  | 5 (0.9)                       | 0.002          |
| Need for corrective surgery         | 5 (1.9)                   | 8 (1.3)                       | 0.25           |
| Prolonged hospitalization           | 15 (5.8)                  | 23 (3.8)                      | 0.21           |
| Total adverse events                | 111 (43.0)                | 190 (31.5)                    | 0.001          |

Variables are presented as frequency (percentage).

MACCE indicates major adverse cardiac and cerebrovascular events; TIA, transient ischemic attacks; BARC, Bleeding Academic Research Consortium.

1  
2  
3 The incidence of definite/probable stent thrombosis was significantly higher in  
4 anemic versus non-anemic patients (3.9 versus 0.7%, respectively,  $p=0.002$ ).  
5  
6 Patients who developed stent thrombosis more often presented with ACS than  
7  
8 those who did not (80.0 versus 56.6%, respectively,  $p=0.07$ ); however, the use  
9  
10 of triple therapy did not differ statistically between groups (60.0 versus 73.3%,  
11  
12 respectively,  $p=0.25$ ). Overall, nearly half (46.7%) of ST events occurred early  
13  
14 (<30 days). Acute (<24h after index PCI); early (<30 days) and late ST (>30  
15  
16 and < 365 days) were detected in 1 (0.4%) and 1 (0.2%) ( $p=0.51$ ); 4 (1.6%) vs.  
17  
18 2 (0.3%) ( $p=0.07$ ); and 6 (2.3%) vs. 2 (0.3%) ( $p=0.01$ ) in patients with anemia  
19  
20 vs. those without anemia, respectively.  
21  
22  
23  
24  
25  
26  
27  
28  
29  
30  
31

32 In univariate analysis age above 75, diabetes, congestive heart failure, anemia,  
33  
34 chronic renal impairment, ACS at presentation, and total stent length were  
35  
36 strongly correlated with both MACCE and all-cause mortality at 12-month  
37  
38 follow-up. In the Cox regression model including all the above variables,  
39  
40 independent predictors of all-cause mortality were anemia (HR 1.62, 95% CI  
41  
42 1.05 – 2.51,  $p=0.029$ ), ACS at presentation (HR 2.26, 95% CI 1.37 – 3.75,  
43  
44  $p=0.001$ ), chronic renal impairment (HR 2.35, 95% CI 1.52 – 3.65,  $p<0.001$ ),  
45  
46 and diabetes (HR 1.76, 95% CI 1.15 – 2.70,  $p=0.009$ ). In contrast, anemia as a  
47  
48 categorical variable was not an independent predictor of MACCE at 12-months  
49  
50 follow-up unlike age above 75 years (HR 1.7, 95%-CI 1.2-2.4,  $p=0.004$ ),  
51  
52  
53  
54  
55  
56  
57  
58  
59  
60

1  
2  
3 diabetes (HR 1.7, 95%-CI 1.2-2.3, p=0.002), ACS at presentation (HR 1.7,  
4  
5 95%-CI 1.2-2.3, p=0.003), and congestive heart failure (HR 1.5, 95%-CI 1.0-  
6  
7 2.1, p=0.03).

8  
9  
10 We performed the multivariate model also using haemoglobin as a continuous  
11  
12 variable. Independent predictors of all-cause mortality were pre-procedural  
13  
14 haemoglobin (HR 0.82, 95% CI 0.72 – 0.93, p=0.002), ACS at presentation  
15  
16 (HR 2.07, 95% CI 1.25 – 3.45, p=0.005), chronic renal impairment (HR 2.06,  
17  
18 95% CI 1.31 – 3.24, p=0.002), and diabetes (HR 1.75, 95% CI 1.14 – 2.70,  
19  
20 p=0.01) in a Cox regression model including age over 75 years, total stent  
21  
22 length and number of treated vessels as covariates. On the contrary to what  
23  
24 was found when assessing anemia as a categorical variable, haemoglobin as a  
25  
26 continuous variable predicted also MACCE. Independent predictors of  
27  
28 MACCE were pre-procedural haemoglobin (HR 0.89, 95% CI 0.81 – 0.98,  
29  
30 p=0.016), ACS at presentation (HR 1.55, 95% CI 1.10 – 2.18, p=0.012),  
31  
32 congestive heart failure (HR 1.45, 95% CI 1.03 – 2.04, p=0.035), age over 75  
33  
34 years (HR 1.77, 95%CI 1.27 – 2.45, p=0.001) and diabetes (HR 1.55, 95% CI  
35  
36 1.13 – 2.13, p=0.007) in a Cox regression model including also total stent  
37  
38 length, chronic renal impairment and number of treated vessels as covariates.  
39  
40  
41  
42  
43  
44  
45  
46  
47  
48  
49

50 When the anemic patients were analysed separately in the Cox  
51  
52 regression model, age over 75 years and ACS at presentation were identified as  
53  
54 independent predictors of MACCE at 12-months; and chronic renal  
55  
56  
57  
58  
59  
60

1  
2  
3 impairment, age over 75 years and ACS at presentation as independent  
4  
5 predictors of all-cause mortality  
6  
7

8  
9 Among 861 patients with available preprocedural measurement of  
10  
11 haemoglobin concentration, 26 (2.8%) had severe anemia (defined as  
12  
13 haemoglobin below 10 g/dl). In this subgroup, MACCE occurred in 12 (46.2%)  
14  
15 patients, 10 (38.5%) patients died, and 8 (30.8%) experienced a BARC 2-5  
16  
17 bleeding episode. At discharge, triple therapy was prescribed in 18 (69.2%)  
18  
19 patients, dual anti-platelet therapy in 8 (30.8%), and no patient was prescribed  
20  
21 vitamin K antagonists plus a single anti-platelet drug. Proton pump inhibitors  
22  
23 were prescribed at discharge in 18 (69.2%) patients, and one (3.8%) patient had  
24  
25 a history of gastrointestinal bleeding.  
26  
27  
28  
29  
30  
31  
32  
33  
34

## 35 **DISCUSSION**

36  
37 Our study is the first report on the impact of anemia on the long-term clinical  
38  
39 outcome of patients with AF undergoing PCI. The AFCAS registry represent a  
40  
41 real-life cohort of high-risk AF-patients requiring PCI. The results of the  
42  
43 current study showing that 30% of the patients were anemic confirm the  
44  
45 previous reports that anemia is a frequent finding in real-world patients with  
46  
47 AF referred for PCI.[6-9,14] Anemic patients in the AFCAS registry were older  
48  
49 with more comorbidities, and presented more often with ACS, compared with  
50  
51 non-anemic patients, as also reported in previous cohorts.[6,7,9,14].  
52  
53  
54  
55  
56  
57  
58  
59  
60

1  
2  
3  
4  
5  
6 Overall, the 12-month clinical outcome was worse in anemic patients. Anemia  
7  
8 remained an independent predictor of all-cause mortality in multivariate  
9  
10 analysis. The higher rate of all-cause mortality might be related to the higher-  
11  
12 risk profile in anemic patients, as well as the underlying disease causing  
13  
14 anemia. Furthermore, anemic patients had more frequent MACCE at 12  
15  
16 months, primarily driven by higher rates of all-cause mortality, and non-fatal  
17  
18 MI. However, anemia was not an independent predictor of MACCE. The higher  
19  
20 rate of non-fatal MI might be explained, at least in part, by the higher frequency  
21  
22 of ACS at presentation in anemic patients.  
23  
24  
25  
26  
27  
28  
29  
30  
31

32 The estimated thromboembolic risk of anemic patients according to CHADS<sub>2</sub>  
33  
34 score was higher. However, no excess in TIA or stroke was seen during the  
35  
36 follow-up and only a trend towards more bleeding was observed. This is  
37  
38 contradictory to previous studies which have reported a higher incidence of  
39  
40 cardiac and cerebrovascular thrombotic events at long-term follow-up in  
41  
42 anemic versus non-anemic patients in various patient cohorts referred for  
43  
44 PCI.[7,9,14-18] The relatively small number of complications in our patient  
45  
46 cohort might explain this difference.  
47  
48  
49  
50  
51  
52  
53  
54  
55  
56  
57  
58  
59  
60

1  
2  
3 The estimated bleeding risk according to the HAS-BLED score was higher in  
4  
5  
6 anemic patients, but there was only a trend towards increased risk of major  
7  
8  
9 bleeding. However, the results of the current study support the previous reports  
10  
11 on the increased bleeding risk associated with anemia in various patient groups  
12  
13 undergoing PCI.[8,9,19] Anemia may be a marker and consequence of an  
14  
15 underlying condition such as bleeding diathesis, occult gastrointestinal  
16  
17 bleeding, or malignancy that augments the bleeding risk. An interesting  
18  
19 observation is that neither the presence of anemia nor higher estimated bleeding  
20  
21 risk seemed to affect the clinician's choice of antithrombotic medications at  
22  
23 discharge. In view of our results, patients with anemia tolerated triple therapy  
24  
25 surprisingly well with only a trend towards increased bleeding.  
26  
27  
28  
29  
30  
31  
32  
33  
34

35 We observed that the rate of definite or probable stent thrombosis was  
36  
37 significantly higher in anemic versus non-anemic patients ( $p = 0.002$ ). ACS at  
38  
39 presentation may have contributed to the higher rate of stent thrombosis in  
40  
41 anemic patients, as patients with anemia more often presented with ACS versus  
42  
43 those without anemia. In addition, in individual cases the presence of anemia  
44  
45 may have influenced the choice of antithrombotic medication. Also, a bleeding  
46  
47 event could have lead to interruption of combination antithrombotic therapy  
48  
49 and thus to a higher risk of stent thrombosis. Consistent with our results,  
50  
51 Pilgrim and co-workers, observed a higher rate of definite stent thrombosis at  
52  
53  
54  
55  
56  
57  
58  
59  
60

1  
2  
3 4-year follow-up in anemic patients who underwent PCI with unrestricted use  
4  
5 of drug-eluting stents, compared with non-anemic ones.[14] Interestingly, in a  
6  
7 recent study, anemia was the only independent predictor of high residual  
8  
9 platelet reactivity on clopidogrel in a series of patients undergoing PCI.[20]  
10  
11 These observations warrant further studies to clarify the underlying  
12  
13 mechanisms.  
14  
15  
16  
17  
18  
19  
20

21  
22 The effect of anemia on the clinical outcome of PCI appears early during  
23  
24 hospitalization. Kaplan-Meier event-free survival curves in the current study  
25  
26 revealed that most of the thrombotic as well as bleeding events occurred early  
27  
28 (within 30 days) following the index PCI (Figure 1). This finding is in line with  
29  
30 previous reports.[6,8,9,15] In patients with coronary artery disease, anemia  
31  
32 may aggravate myocardial ischemia, and unveil significant coronary  
33  
34 obstruction. Cardiac output increases in patients with anemia in order to  
35  
36 maintain adequate oxygen delivery to the tissues. This increases heart rate and  
37  
38 induces myocardial hypertrophy, which in turn, increases myocardial oxygen  
39  
40 demand, and further exaggerates the myocardial oxygen demand/supply  
41  
42 imbalance.[21] On the other hand, patients with severe anemia receive more  
43  
44 frequent blood transfusion, which was reported to have an adverse impact on  
45  
46 survival after PCI.[22] Unfortunately, information on blood transfusions was  
47  
48 not available in our registry except for the in-hospital phase. More importantly,  
49  
50  
51  
52  
53  
54  
55  
56  
57  
58  
59  
60



1  
2  
3 anemia is frequently associated with severe underlying chronic diseases which  
4  
5 may compromise long-term survival. Of note is a recent report suggesting that  
6  
7 in patients who underwent PCI with drug-eluting stents, those in whom anemia  
8  
9 improved at follow-up had less MACCE at a median follow-up of 25 months,  
10  
11 compared with those with sustained anemia suggesting that a transient cause is  
12  
13 less detrimental than a long-standing state causing anemia, e.g. malignancy.[16]  
14  
15  
16  
17  
18  
19  
20

### 21 **Limitations of the study**

22  
23  
24 The current study has the inherent limitations of the observational study design,  
25  
26 including individual risk-based decision making in treatment choices, which  
27  
28 may introduce selection bias, even though we did not observe any difference  
29  
30 between the two study groups in the antithrombotic treatment prescribed at  
31  
32 discharge. Another possible confounder is the heterogeneity of the AF  
33  
34 population among the participating centers and some differences in the  
35  
36 periprocedural routines. Moreover, the aetiology of anemia was not  
37  
38 systematically investigated; yet, it is beyond the scope of the current study. The  
39  
40 strength of the study is the enrolment of consecutive patients with the only  
41  
42 exclusion criteria being unwillingness/inability to participate in the study. In  
43  
44 this sense the study population represents well real-world patients with AF  
45  
46 referred for PCI.  
47  
48  
49  
50  
51  
52  
53  
54  
55  
56  
57  
58  
59  
60

## Conclusion

Anemia was a frequent finding in patients with AF referred for PCI. Anemia seems to be an independent risk factor for all-cause mortality during 12-month follow-up. Anemia is also associated with more MACCE, and a trend toward a higher rate of bleeding.

## ACKNOWLEDGMENTS

We thank our study coordinator Tuija Vasankari, RN, for her valuable input in data management.

## COMPETING INTERESTS

The authors declare no competing interests.

## FUNDING

This study was supported by grants from the Finnish Foundation for Cardiovascular Research, Helsinki, Finland.

**Contributorship statement:** Marja Puurunen and Tuomas Kiviniemi participated in data collection and analysis and writing the manuscript; Wail Nammas contributed to data analysis and writing of the manuscript; Axel Schlitt, Andrea Rubboli, Kai Nyman, Pasi Karjalainen and Paulus Kirchhof contributed to data collection and critical revision of the manuscript; Gregory Lip contributed to study design, data collection and critical revision of the manuscript; Juhani Airaksinen acted as the primary investigator of the AFCAS

1  
2  
3 study and contributed to study design, data collection, data analysis and writing  
4  
5 of the manuscript.  
6  
7

8  
9  
10 **Data sharing** The whole study data is available from the study coordinator Ms.  
11  
12 Tuija Vasankari email: tuija.vasankari@tyks.fi or Dr. Tuomas Kiviniemi email:  
13  
14 tuomas.kiviniemi@utu.fi in addition to corresponding author Prof. Juhani  
15  
16 Airaksinen email: juhani.airaksinen@tyks.fi.  
17  
18  
19

## 20 21 22 23 24 **REFERENCES**

- 25  
26  
27 1. Rubboli A, Halperin JL, Airaksinen KE, et al. Antithrombotic therapy in  
28  
29 patients treated with oral anticoagulation undergoing coronary artery  
30  
31 stenting. An expert consensus document with focus on atrial fibrillation.  
32  
33 Ann Med 2008;40(6):428-36.  
34  
35  
36  
37 2. Rubboli A, Colletta M, Valencia J, et al for the WARfarin, Coronary  
38  
39 STENTing (WAR-STENT) Study Group. Periprocedural management and  
40  
41 in-hospital outcome of patients with indication for oral anticoagulation  
42  
43 undergoing coronary artery stenting. J Interv Cardiol 2009;22:390–397.  
44  
45  
46  
47 3. Lip GYH, Huber K, Andreotti F, et al. Antithrombotic management of atrial  
48  
49 fibrillation patients presenting with acute coronary syndrome and/or  
50  
51 undergoing coronary stenting: executive summary—a Consensus Document  
52  
53  
54  
55  
56 of the European Society of Cardiology Working Group on Thrombosis,  
57  
58  
59  
60

1  
2  
3 endorsed by the European Heart Rhythm Association (EHRA) and the  
4  
5 European Association of Percutaneous Cardiovascular Interventions  
6  
7 (EAPCI). *Eur Heart J* 2010;31:1311-1318.  
8  
9

- 10  
11 4. Faxon DP, Eikelboom JW, Berger PB, et al. Consensus Document:  
12  
13 Antithrombotic therapy in patients with atrial fibrillation undergoing  
14  
15 coronary stenting. A North-American perspective. *Thromb Haemost*  
16  
17 2011;106:522-84.  
18  
19  
20  
21 5. Rubboli A, Dewilde W, Huber K, et al. The management of patients on oral  
22  
23 anticoagulation undergoing coronary stent implantation: a survey among  
24  
25 interventional cardiologists from eight European countries. *J Interv Cardiol*  
26  
27 2012;25:163-9.  
28  
29  
30  
31 6. McKechnie RS, Smith D, Montoye C, et al; Blue Cross Blue Shield of  
32  
33 Michigan Cardiovascular Consortium (BMC2). Prognostic implication of  
34  
35 anemia on in-hospital outcomes after percutaneous coronary intervention.  
36  
37 *Circulation* 2004;110(3):271-7.  
38  
39  
40  
41  
42 7. Nikolsky E, Mehran R, Aymong ED, et al. Impact of anemia on outcomes of  
43  
44 patients undergoing percutaneous coronary interventions. *Am J Cardiol*  
45  
46 2004;94(8):1023-7.  
47  
48  
49  
50 8. Dündar C, Oduncu V, Erkol A, et al. In-hospital prognostic value of  
51  
52 hemoglobin levels on admission in patients with acute ST segment elevation  
53  
54  
55  
56  
57  
58  
59  
60

- 1  
2  
3 myocardial infarction undergoing primary angioplasty. *Clin Res Cardiol*  
4  
5  
6 2012;101(1):37-44.  
7  
8  
9 9. Ayhan E, Aycicek F, Uyarel H, et al. Patients with anemia on admission  
10  
11 who have undergone primary angioplasty for ST elevation myocardial  
12  
13 infarction: in-hospital and long-term clinical outcomes. *Coron Artery Dis*  
14  
15 2011;22(6):375-9.  
16  
17  
18  
19 10. Kiviniemi T, Karjalainen P, Rubboli A, et al. Thrombocytopenia in patients  
20  
21 with atrial fibrillation on oral anticoagulation undergoing percutaneous  
22  
23 coronary intervention. *Am J Cardiol* 2013 Aug 15;112(4):493-8.  
24  
25  
26  
27 11. Schlitt A, Rubboli A, Lip GY, et al; for the AFCAS (Management of  
28  
29 patients with Atrial Fibrillation undergoing Coronary Artery Stenting Study  
30  
31 Group). The management of patients with atrial fibrillation undergoing  
32  
33 percutaneous coronary intervention with stent implantation: In-hospital-data  
34  
35 from the atrial fibrillation undergoing coronary artery stenting study.  
36  
37 *Catheter Cardiovasc Interv* 2013;82(7):E864-70  
38  
39  
40  
41  
42  
43 12. Mehran R, Rao SV, Bhatt DL, et al. Standardized bleeding definitions for  
44  
45 cardiovascular clinical trials: a consensus report from the bleeding academic  
46  
47 research consortium, *Circulation* 2011;123:2736-2747.  
48  
49  
50  
51 13. Nutritional anaemias. Report of a WHO scientific group. *World Health*  
52  
53 *Organ Tech* 1968;405:5-32.  
54  
55  
56  
57  
58  
59  
60

- 1  
2  
3 14. Pilgrim T, Vetterli F, Kalesan B, et al. The impact of anemia on long-term  
4  
5 clinical outcome in patients undergoing revascularization with the  
6  
7 unrestricted use of drug-eluting stents. *Circ Cardiovasc Interv.*  
8  
9 2012;5(2):202-10.  
10  
11  
12  
13 15. Lee PC, Kini AS, Ahsan C, et al. Anemia is an independent predictor of  
14  
15 mortality after percutaneous coronary intervention. *J Am Coll Cardiol*  
16  
17 2004;44(3):541-6.  
18  
19  
20  
21 16. Kim TH, Koh YS, Chang K, et al; CathOlic university of Korea –  
22  
23 percutaneous Coronary inTervention registry investigators. Improved  
24  
25 anemia is associated with favorable long-term clinical outcomes in patients  
26  
27 undergoing PCI. *Coron Artery Dis* 2012;23(6):391-9.  
28  
29  
30  
31  
32 17. Kitai Y, Ozasa N, Morimoto T, et al; on behalf of the CREDO-Kyoto  
33  
34 registry investigators. Prognostic implications of anemia with or without  
35  
36 chronic kidney disease in patients undergoing elective percutaneous  
37  
38 coronary intervention. *Int J Cardiol* 2013;168(6):5221-8.  
39  
40  
41  
42  
43 18. Hosseini SK, Ansari MJ, Lotfi Tokaldany M, et al. Association between  
44  
45 preprocedural hemoglobin level and 1-year outcome of elective  
46  
47 percutaneous coronary intervention. *J Cardiovasc Med.* 2013 Feb 15. [Epub  
48  
49 ahead of print]  
50  
51  
52  
53 19. Manzano-Fernández S, Pastor FJ, Marín F, et al. Increased major bleeding  
54  
55 complications related to triple antithrombotic therapy usage in patients with  
56  
57  
58  
59  
60

atrial fibrillation undergoing percutaneous coronary artery stenting. *Chest* 2008;134(3):559-67.

20.Toma C, Zahr F, Moguilanski D, et al. Impact of anemia on platelet response to clopidogrel in patients undergoing percutaneous coronary stenting. *Am J Cardiol* 2012;109(8):1148-53.

21.Foley RN, Parfrey PS, Hamett JD, et al. The impact of anemia on cardiomyopathy, morbidity, and mortality in end-stage renal disease. *Am J Kidney Dis* 1996;28:53– 61.

22.Maluenda G, Lemesle G, Ben-Dor I, et al. Value of blood transfusion in patients with a blood hematocrit of 24% to 30% after percutaneous coronary intervention. *Am J Cardiol* 2009;104:1069 –1073.

**FIGURE LEGENDS**

Figure 1 Kaplan-Meier survival curves for the occurrence of adverse events in anemic (dotted lines) versus non-anemic (solid line) patients at 2-month follow-up: all-cause mortality (a), MACCE free survival (b) and bleeding event free survival (c)

For peer review only



1  
2  
3  
4  
5  
6  
7  
8  
9  
10  
11  
12  
13  
14  
15  
16  
17  
18  
19  
20  
21  
22  
23  
24  
25  
26  
27  
28  
29  
30  
31  
32  
33  
34  
35  
36  
37  
38  
39  
40  
41  
42  
43  
44  
45  
46  
47  
48  
49  
50  
51  
52  
53  
54  
55  
56  
57  
58  
59  
60

For peer review only

1  
2  
3  
4  
5  
6  
7  
8  
9  
10  
11  
12  
13  
14  
15  
16  
17  
18  
19  
20  
21  
22  
23  
24  
25  
26  
27  
28  
29  
30  
31  
32  
33  
34  
35  
36  
37  
38  
39  
40  
41  
42  
43  
44  
45  
46  
47  
48  
49  
50  
51  
52  
53  
54  
55  
56  
57  
58  
59  
60

For peer review only

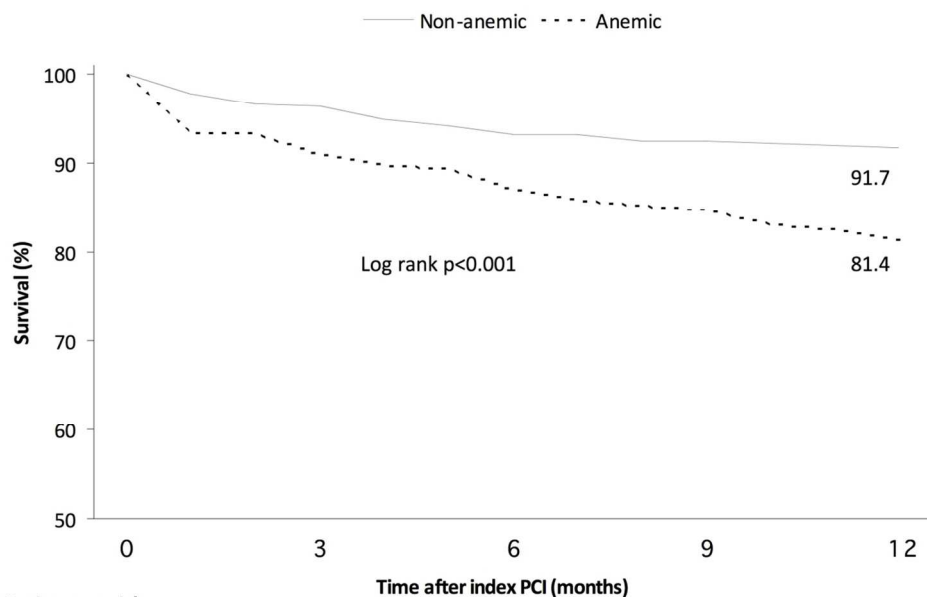

|                  |     | Time after index PCI (months) |     |     |     |    |
|------------------|-----|-------------------------------|-----|-----|-----|----|
| Patients at risk |     | 0                             | 3   | 6   | 9   | 12 |
| Non-anemic       | 603 | 581                           | 562 | 558 | 553 |    |
| Anemic           | 258 | 235                           | 225 | 219 | 210 |    |

Figure 1a  
119x90mm (300 x 300 DPI)

View only

1  
2  
3  
4  
5  
6  
7  
8  
9  
10  
11  
12  
13  
14  
15  
16  
17  
18  
19  
20  
21  
22  
23  
24  
25  
26  
27  
28  
29  
30  
31  
32  
33  
34  
35  
36  
37  
38  
39  
40  
41  
42  
43  
44  
45  
46  
47  
48  
49  
50  
51  
52  
53  
54  
55  
56  
57  
58  
59  
60

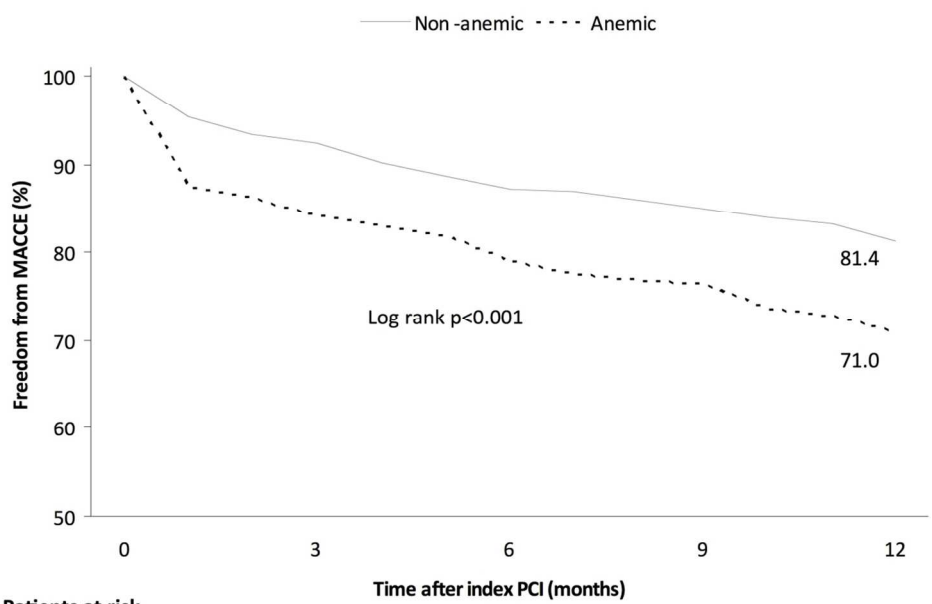

|            |     | Patients at risk |     |     |     |    |
|------------|-----|------------------|-----|-----|-----|----|
|            |     | 0                | 3   | 6   | 9   | 12 |
| Non-anemic | 603 | 552              | 521 | 507 | 486 |    |
| Anemic     | 258 | 215              | 202 | 195 | 181 |    |

Figure 1b  
119x90mm (300 x 300 DPI)

View only

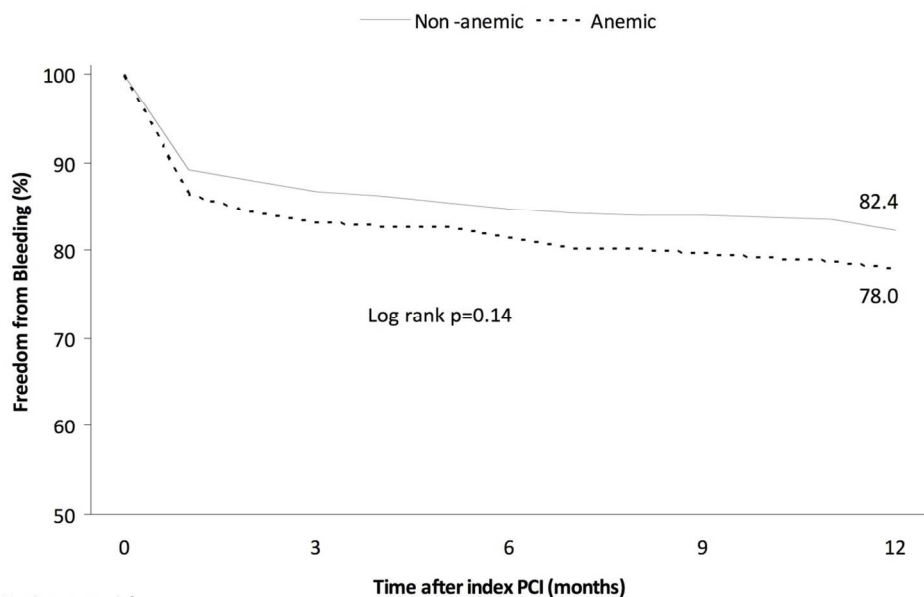

|                  |     | Time after index PCI (months) |     |     |     |    |
|------------------|-----|-------------------------------|-----|-----|-----|----|
| Patients at risk |     | 0                             | 3   | 6   | 9   | 12 |
| Non-anemic       | 603 | 507                           | 485 | 476 | 463 |    |
| Anemic           | 258 | 197                           | 187 | 180 | 169 |    |

Figure 1c  
119x90mm (300 x 300 DPI)

View only

**Table 1.** Bleeding Academic Research Consortium Definition for Bleeding.

|                |                                                                                                                                                                                                                                                                                                                                                                                                                                                               |
|----------------|---------------------------------------------------------------------------------------------------------------------------------------------------------------------------------------------------------------------------------------------------------------------------------------------------------------------------------------------------------------------------------------------------------------------------------------------------------------|
| <b>Type 2</b>  | any overt, actionable sign of hemorrhage (eg, more bleeding than would be expected for a clinical circumstance, including bleeding found by imaging alone) that does not fit the criteria for type 3, 4, or 5 but does meet at least one of the following criteria:<br><br>(1) requiring nonsurgical, medical intervention by a healthcare professional,<br><br>(2) leading to hospitalization or increased level of care, or<br><br>(3) prompting evaluation |
| <b>Type 3a</b> | Overt bleeding plus hemoglobin drop of 3 to 5 g/dL* (provided hemoglobin drop is related to bleed)<br><br>Any transfusion with overt bleeding                                                                                                                                                                                                                                                                                                                 |
| <b>Type 3b</b> | Overt bleeding plus hemoglobin drop >5 g/dL* (provided hemoglobin drop is related to bleed)<br><br>Cardiac tamponade<br><br>Bleeding requiring surgical intervention for control (excluding dental/nasal/skin/hemorrhoid)<br><br>Bleeding requiring intravenous vasoactive agents                                                                                                                                                                             |
| <b>Type 3c</b> | Intracranial hemorrhage (does not include microbleeds or hemorrhagic transformation, does include intraspinal)<br><br>Subcategories confirmed by autopsy or imaging or lumbar puncture<br><br>Intraocular bleed compromising vision                                                                                                                                                                                                                           |
| <b>Type 5</b>  | fatal bleeding                                                                                                                                                                                                                                                                                                                                                                                                                                                |

Type 1 and type 4 (coronary bypass related) bleeding events were not included in the analysis.

**Online Table 2** Bleeding events at 12-month follow-up in the two study subgroups

| Endpoints            | Anemia (N=258) | Non-anemic<br>(N=603) | <i>p</i> value |
|----------------------|----------------|-----------------------|----------------|
| BARC 2               | 22 (8.5)       | 48 (8.0)              | 0.786          |
| BARC 3a bleeding     | 18 (7.0)       | 20 (3.3)              | 0.028          |
| BARC 3b bleeding     | 10 (3.9)       | 22 (3.6)              | 0.846          |
| BARC 3c bleeding     | 0 (0)          | 9 (1.5)               | 0.064          |
| BARC 5 bleeding      | 4 (1.6)        | 5 (0.8)               | 0.464          |
| Total adverse events | 111 (43.0)     | 190 (31.5)            | 0.001          |

Variables are presented as frequency (percentage).

BARC indicates Bleeding Academic Research Consortium.

1  
2  
3  
4 **Impact of anemia on clinical outcome in patients with atrial fibrillation**  
5  
6 **undergoing percutaneous coronary intervention: insights from the AFCAS**  
7  
8 **registry**  
9  
10

11  
12  
13  
14 **Puurunen Marja\***, **Kiviniemi Tuomas†**, **Nammas Wail†**, **Schlitt Axel ‡**, **Rubboli**

15 **Andrea§**, **Nyman Kai#**, **Karjalainen Pasi¶**, **Kirchhof Paulus††,\*\***, **Lip Gregory YH††**,

16  
17  
18  
19 **Airaksinen KE Juhani†**  
20

21 \* Hemostasis laboratory, Finnish Red Cross Blood Service, Helsinki, Finland

22 †Heart Center, Turku University Hospital and University of Turku, Turku, Finland;

23 ‡Medical Faculty, Martin Luther University Halle-Wittenberg, Halle-Wittenberg, Germany;

24 §Division of Cardiology, Laboratory of Interventional Cardiology, Ospedale Maggiore,  
25 Bologna, Italy;

26 #Department of Cardiology, Central Finland Central Hospital, Jyväskylä, Finland;

27 ¶Heart Center, Satakunta Central Hospital, Pori, Finland;

28 \*\* Department of Cardiovascular Medicine, Hospital of the University of Münster, Münster,  
29 Germany  
30

31 ††University of Birmingham Centre for Cardiovascular Sciences, City Hospital, Birmingham,  
32 United Kingdom  
33

34  
35  
36  
37  
38  
39  
40  
41  
42  
43  
44  
45  
46  
47 **Address for correspondence:** Dr. K. E. Juhani Airaksinen, Heart Center, Turku University  
48 Hospital, Kiinamylynkatu 4-8, FIN-20520 Turku, Finland.

49  
50  
51  
52 Email: juhani.airaksinen@tyks.fi  
53

54 **Word count** (excluding title page, abstract, tables, figures and references) 27~~25~~51  
55  
56  
57  
58  
59  
60



1  
2  
3 **Contributorship statement:** Marja Puurunen and Tuomas Kiviniemi participated in data  
4 collection and analysis and writing the manuscript; Wail Nammas contributed to data analysis  
5 and writing of the manuscript; Axel Schlitt, Andrea Rubboli, Kai Nyman, Pasi Karjalainen  
6 and Paulus Kirchhof contributed to data collection and critical revision of the manuscript;  
7 Gregory Lip contributed to study design, data collection and critical revision of the  
8 manuscript; Juhani Airaksinen acted as the primary investigator of the AFCAS study and  
9 contributed to study design, data collection, data analysis and writing of the manuscript.  
10  
11  
12  
13  
14  
15  
16  
17  
18  
19  
20

21 **Extra data** is available by emailing Prof. Juhani Airaksinen at [juhani.airaksinen@tyks.fi](mailto:juhani.airaksinen@tyks.fi).  
22  
23  
24  
25  
26  
27  
28  
29  
30  
31  
32  
33  
34  
35  
36  
37  
38  
39  
40  
41  
42  
43  
44  
45  
46  
47  
48  
49  
50  
51  
52  
53  
54  
55  
56  
57  
58  
59  
60

## ABSTRACT

**Objectives:** Anemia has an adverse impact on the outcome in the general patient population undergoing percutaneous coronary intervention (PCI). The aim of this study was to analyze the impact of anemia on the 12-month clinical outcome of patients with atrial fibrillation (AF) undergoing PCI and therefore requiring intense antithrombotic treatment. We hypothesized that anemia might be associated with a worse outcome and more bleeding in these anticoagulated patients.

**Setting:** Data was collected from 17 secondary care centers in Europe.

**Participants:** Consecutive patients with AF undergoing PCI were enrolled in the prospective, multicenter AFCAS (Atrial Fibrillation undergoing Coronary Artery Stenting) registry. Altogether 929 patients participated in the study. Preprocedural haemoglobin concentration was available for 861 (92.7%) (30% female). Only exclusion criteria were inability or unwillingness to give informed consent. Anemia was defined as a haemoglobin concentration of <12 g/dl for women, and <13 g/dl for men.

**Outcome measures:** The primary endpoint was occurrence of major adverse cardiac and cerebrovascular events (MACCE) or bleeding events.

**Results:** 258/861 (30%) patients had anemia. Anemic patients were older, had more often diabetes, higher CHA<sub>2</sub>DS<sub>2</sub>-VASc score, prior history of heart

1  
2  
3 failure, chronic renal impairment, and acute coronary syndrome. Anemic  
4  
5 patients had more MACCE than non-anemic (29.1% versus 19.4%,  
6  
7 respectively,  $p=0.002$ ), and minor bleeding events (7.0% versus 3.3%,  
8  
9 respectively,  $p=0.028$ ), with a trend toward more total bleeding events (25.2%  
10  
11 versus 21.7%, respectively,  $p=0.059$ ). No difference was observed in  
12  
13 antithrombotic regimens at discharge. In multivariate analysis anemia was an  
14  
15 independent predictor of all-cause mortality at 12-months follow-up (HR 1.62,  
16  
17 95% CI 1.05 – 2.51,  $p=0.029$ ).  
18  
19  
20  
21  
22  
23

24 **Conclusions:** Anemia was a frequent finding in patients with AF referred for  
25  
26 PCI. Anemic patients had a higher all-cause mortality, more thrombotic events,  
27  
28 and minor bleeding events. Anemia seems to identify patients at risk for  
29  
30 cardiovascular events and death.  
31  
32  
33

34  
35 **Trial registration:** ClinicalTrials.gov number NCT00596570  
36  
37  
38  
39

40 **Keywords:** atrial fibrillation, percutaneous coronary intervention, anemia  
41  
42  
43  
44  
45

46 **Strengths and limitations of the study:**  
47

- 48 - The strength of the study is the enrolment of consecutive patients with  
49  
50 the only exclusion criteria being unwillingness/inability to participate in  
51  
52 the study. In this sense the study population represents well real-world  
53  
54 patients with AF referred for PCI.  
55  
56  
57  
58  
59  
60

- 1  
2  
3  
4  
5  
6  
7  
8  
9  
10  
11  
12  
13  
14  
15  
16  
17  
18  
19  
20  
21  
22  
23  
24  
25  
26  
27  
28  
29  
30  
31  
32  
33  
34  
35  
36  
37  
38  
39  
40  
41  
42  
43  
44  
45  
46  
47  
48  
49  
50  
51  
52  
53  
54  
55  
56  
57  
58  
59  
60
- The study adds to our knowledge on the prevalence and impact of anemia in AF patients undergoing PCI and thus requiring combination antithrombotic medication. It shows that anemia is a frequent finding and that even mild anemia has an adverse impact on outcome.
  - The current study has the inherent limitations of the observational study design, including individual risk-based decision making in treatment choices, which may introduce selection bias. Another possible confounder is the heterogeneity of the AF population among the participating centers and some differences in the periprocedural routines.
  - The aetiology of anemia could not be systematically investigated and is therefore out of the scope of this study.

## INTRODUCTION

It is estimated that around 5% of patients undergoing percutaneous coronary intervention (PCI) need long-term oral anticoagulation (OAC) due to atrial fibrillation (AF).[1,2] Yet, the current recommendations on the management of antithrombotic treatment in patients with AF undergoing PCI and stenting are mainly derived from small studies, amounting to a weak level of evidence.[3,4] Moreover, the real-world management of patients on OAC undergoing PCI is variable, and only partially adherent to the current recommendations.[5]

Defined according to the World Health Organization (WHO), anemia has been reported to affect nearly 25% of patients undergoing PCI and stenting. Anemic patients undergoing PCI are generally older with more comorbidities, and have higher rates of in-hospital mortality and major adverse cardiac and cerebrovascular events (MACCE), as well as 1-year mortality.[6,7] Furthermore, low admission haemoglobin level was found to be an independent predictor of in-hospital and long-term mortality, and was associated with higher rates of in-hospital minor and major bleeding events in patients undergoing primary PCI for ST-segment elevation myocardial infarction (MI).[8,9]

However, little is known about the effect of anemia on the outcome of patients with AF undergoing PCI and thus requiring intensive antithrombotic treatment. Anemia is possibly a marker of high bleeding risk, which could be aggravated by the underlying cause. Therefore, we analyzed data from the

1  
2  
3 prospective AFCAS (Atrial Fibrillation undergoing Coronary Artery Stenting)  
4  
5  
6 registry to explore the impact of anemia on the 12-month clinical outcome of  
7  
8 patients with AF undergoing PCI.[10]  
9

## 10 11 12 13 **METHODS**

### 14 15 **Patients**

16  
17 The AFCAS registry (ClinicalTrials.gov number NCT00596570)  
18  
19 is a prospective, multicenter registry that enrolled patients with AF referred for  
20  
21 PCI in 5 European countries. The study design has been described in detail  
22  
23 previously.[11] Patients were enrolled if they had: 1) history of AF  
24  
25 (paroxysmal, persistent, or permanent), or 2) on-going AF during the index  
26  
27 PCI. Out of the 929 participants 861 (92.7%) had a preprocedural haemoglobin  
28  
29 count available and were included in this analysis.  
30  
31  
32  
33  
34  
35  
36  
37  
38  
39

40  
41 Coronary angiography and PCI were performed via either radial or femoral  
42  
43 access, and hemostasis was achieved according to local practice. Coronary  
44  
45 lesions were treated according to contemporary interventional techniques. Low-  
46  
47 molecular-weight heparin (enoxaparin sodium, dalteparin), unfractionated  
48  
49 heparin, bivalirudin, and glycoprotein IIb/IIIa inhibitors were administered at  
50  
51 the operator's discretion. The post-discharge medication was completely at the  
52  
53 discretion of the treating physician.  
54  
55  
56  
57  
58  
59  
60

1  
2  
3  
4  
5  
6 The primary endpoints of the current study were 1) occurrence of MACCE  
7  
8 defined as a composite of all-cause mortality, any non-fatal MI, any  
9  
10 revascularization, definite/probable stent thrombosis, transient ischemic attack  
11  
12 (TIA) or stroke, and peripheral arterial embolism; 2) bleeding events; and 3)  
13  
14 total adverse events (a composite of MACCE plus bleeding events). Bleeding  
15  
16 events were defined according to the Bleeding Academic Research Consortium  
17  
18 (BARC) criteria as minor (BARC 2), and major (BARC 3a, 3b, 3c and 5)  
19  
20 bleeding events; however, CABG-related bleeding was excluded.[12]  
21  
22

23  
24  
25  
26  
27 ([WebOnline](#) Table 1)  
28  
29  
30  
31

32 Anemia was defined as a haemoglobin concentration of <12 g/dl for women,  
33  
34 and <13 g/dl for men, according to the definition of the WHO.[13] Chronic  
35  
36 renal impairment was defined by an estimated glomerular filtration rate below  
37  
38 60 ml/min.  
39  
40  
41  
42  
43  
44

#### 45 **Ethical aspects**

46  
47  
48 The study was initiated by the investigators and conducted according to the  
49  
50 ethical guidelines of the 1964 Declaration of Helsinki, as revised in 2002.  
51  
52  
53 Informed written consent was obtained from every patient after full explanation  
54  
55  
56  
57  
58  
59  
60

1  
2  
3 of the study protocol. The study protocol was approved by the ethics  
4  
5 committees of the participating centers.  
6  
7  
8  
9

### 10 11 **Statistical analysis**

12  
13 For analysis patients with available preprocedural measurement of haemoglobin  
14 concentration were divided into two subgroups: anemic patients, and control  
15 patients without anemia. Continuous variables were reported as the mean  $\pm$   
16 standard deviation if normally distributed, and as median [inter-quartile range  
17 (IQR)] if they were skewed. Data were tested for normal distribution using the  
18 Kolmogorov-Smirnov and Shapiro-Wilk tests. Categorical variables were  
19 described with absolute and relative (percentage) frequencies. Comparisons  
20 between the two study subgroups were performed using the unpaired *t*-test or  
21 Mann-Whitney test for continuous variables, and Pearson  $\chi^2$  or Fisher's exact  
22 test for categorical variables, as appropriate. Cox regression hazard model was  
23 used to identify the independent predictors of MACCE, and all-cause mortality  
24 at 12-month follow-up. Baseline variables correlating at  $p < 0.10$  level with the  
25 dependent variable in univariate analyses were entered in the Cox regression  
26 model as covariates. Cox regression hazard model was used to identify the  
27 independent predictors of MACCE, and all-cause mortality at 12-month follow-  
28 up in the subgroup of anemic patients. Finally we constructed Kaplan-Meier  
29 survival curves to display the time-to-event relationship for the occurrence of  
30  
31  
32  
33  
34  
35  
36  
37  
38  
39  
40  
41  
42  
43  
44  
45  
46  
47  
48  
49  
50  
51  
52  
53  
54  
55  
56  
57  
58  
59  
60



1  
2  
3 all-cause mortality, MACCE, and all bleeding events. Statistical analysis was  
4  
5 performed using SPSS statistical software (SPSS v. 16.0.1, SPSS Inc., Chicago,  
6  
7 Ill., USA).  
8  
9

## 10 11 12 13 **RESULTS**

### 14 **Baseline characteristics**

15  
16  
17  
18 Out of 929 patients enrolled in the AFCAS registry and followed up for 12  
19  
20 months, 861 (92.7%) had available preprocedural measurement of haemoglobin  
21  
22 concentration, of whom 258 (30%) had anemia and 603 (70%) had normal  
23  
24 haemoglobin concentration. Anemic patients were older, more likely to have  
25  
26 diabetes mellitus, hypertension, history of heart failure and chronic renal  
27  
28 impairment, HAS-BLED score  $\geq 3$ , higher CHA<sub>2</sub>DS<sub>2</sub>VASC score, and more  
29  
30 likely presented with acute coronary syndrome (ACS) as opposed to chronic  
31  
32 stable angina, compared with those without anemia ( $p < 0.05$  for all), as shown  
33  
34 in Table 1. Furthermore, anemic patients had more vessels treated during the  
35  
36 index procedure, and a greater total stent length, compared with those without  
37  
38 anemia ( $p < 0.05$  for both) (Table 2). At discharge, no significant differences  
39  
40 were seen in the prescription of antithrombotic medications in the two study  
41  
42 groups ( $p = 0.15$ ) (Table 3). The duration of clopidogrel treatment did not differ  
43  
44 in anemic versus non-anemic patients on triple therapy (median [IQR]: 3 [11]  
45  
46 versus 3 [5] months,  $p = 0.61$ ), on dual antiplatelet therapy (median [IQR]: 12  
47  
48  
49  
50  
51  
52  
53  
54  
55  
56  
57  
58  
59  
60

[11] versus 12 [11] months,  $p=0.72$ ), or on vitamin K antagonist + clopidogrel (median [IQR]: 12 [11] versus 3 [11] months,  $p=0.65$ ). Proton pump inhibitors were more frequently prescribed to patients with anemia versus those without (47.7 versus 31.3%, respectively,  $p < 0.001$ ).

**Table 1** Baseline clinical characteristics of the two study subgroups

| Variable                       | Anemia (N=258) | Non-anemic (N=603) | <i>p</i> value |
|--------------------------------|----------------|--------------------|----------------|
| Age (yrs)                      | 76 [9]         | 73 [11]            | <0.001         |
| Female gender                  | 89 (34.5)      | 170 (28.2)         | 0.074          |
| Diabetes mellitus              | 119 (46.1)     | 191 (31.7)         | <0.001         |
| Hypercholesterolemia           | 162 (62.8)     | 407 (67.5)         | 0.183          |
| Current or ex-smoking          | 26 (10.1)      | 62 (10.3)          | 1.00           |
| Hypertension                   | 221 (85.7)     | 503 (83.4)         | 0.48           |
| Paroxysmal atrial fibrillation | 103 (39.9)     | 229 (38.0)         | 0.594          |
| Persistent atrial fibrillation | 22 (8.5)       | 78 (12.9)          | 0.081          |
| Permanent atrial fibrillation  | 129 (50)       | 294 (48.8)         | 0.766          |

|    |                                                 |            |            |        |
|----|-------------------------------------------------|------------|------------|--------|
| 1  |                                                 |            |            |        |
| 2  |                                                 |            |            |        |
| 3  |                                                 |            |            |        |
| 4  | CHA <sub>2</sub> DS <sub>2</sub> -VASc score >4 | 148 (57.4) | 235 (39.0) | <0.001 |
| 5  |                                                 |            |            |        |
| 6  | HAS BLED score ≥3                               | 215 (83.3) | 441 (73.1) | 0.001  |
| 7  |                                                 |            |            |        |
| 8  |                                                 |            |            |        |
| 9  | History of peptic ulcer                         | 17 (6.6)   | 27 (4.5)   | 0.236  |
| 10 |                                                 |            |            |        |
| 11 |                                                 |            |            |        |
| 12 | History of cerebral hemorrhage                  | 4 (1.6)    | 6 (1.0)    | 0.497  |
| 13 |                                                 |            |            |        |
| 14 |                                                 |            |            |        |
| 15 | History of GI hemorrhage                        | 9 (3.5)    | 12 (2.0)   | 0.144  |
| 16 |                                                 |            |            |        |
| 17 |                                                 |            |            |        |
| 18 | History of heart failure                        | 69 (26.7)  | 113 (18.7) | 0.011  |
| 19 |                                                 |            |            |        |
| 20 |                                                 |            |            |        |
| 21 | eGFR below 60 ml/min                            | 119 (52.2) | 175 (31.9) | <0.001 |
| 22 |                                                 |            |            |        |
| 23 |                                                 |            |            |        |
| 24 | Prior transient ischemic attacks                | 12 (4.7)   | 30 (5.0)   | 1.00   |
| 25 |                                                 |            |            |        |
| 26 |                                                 |            |            |        |
| 27 |                                                 |            |            |        |
| 28 | Prior stroke                                    | 36 (14.0)  | 67 (11.1)  | 0.252  |
| 29 |                                                 |            |            |        |
| 30 |                                                 |            |            |        |
| 31 | Prior MI                                        | 76 (29.5)  | 146 (24.2) | 0.126  |
| 32 |                                                 |            |            |        |
| 33 |                                                 |            |            |        |
| 34 | Prior PCI                                       | 47 (18.2)  | 100 (16.6) | 0.555  |
| 35 |                                                 |            |            |        |
| 36 |                                                 |            |            |        |
| 37 | Prior coronary bypass surgery                   | 47 (18.2)  | 78 (12.9)  | 0.057  |
| 38 |                                                 |            |            |        |
| 39 |                                                 |            |            |        |
| 40 | Proton pump inhibitors                          | 123 (47.7) | 189 (31.3) | <0.001 |
| 41 |                                                 |            |            |        |
| 42 |                                                 |            |            |        |
| 43 | Stable angina pectoris                          | 81 (31.4)  | 289 (48.0) | <0.001 |
| 44 |                                                 |            |            |        |
| 45 |                                                 |            |            |        |
| 46 | ACS                                             | 177 (68.6) | 313 (52.0) | <0.001 |
| 47 |                                                 |            |            |        |
| 48 |                                                 |            |            |        |
| 49 | Unstable angina pectoris                        | 53 (20.5)  | 107 (17.7) | 0.34   |
| 50 |                                                 |            |            |        |
| 51 |                                                 |            |            |        |
| 52 | Non-ST-elevation MI                             | 83 (32.2)  | 132 (21.9) | 0.002  |
| 53 |                                                 |            |            |        |
| 54 |                                                 |            |            |        |
| 55 | ST-elevation MI                                 | 41 (15.9)  | 74 (12.3)  | 0.156  |
| 56 |                                                 |            |            |        |
| 57 |                                                 |            |            |        |
| 58 |                                                 |            |            |        |
| 59 |                                                 |            |            |        |
| 60 |                                                 |            |            |        |

Continuous variables are presented as median [interquartile range], whereas categorical variables are presented as frequency (percentage).

ACS indicates acute coronary syndrome; eGFR, estimated glomerular filtration rate; GI, gastrointestinal, IQR, inter-quartile range; MI, myocardial infarction; PCI, percutaneous coronary intervention.

**Table 2** Procedural data of the two study subgroups

| Variable                                | Anemia<br>(N=258) | Non-anemic<br>(N=603) | <i>p</i> value |
|-----------------------------------------|-------------------|-----------------------|----------------|
| Femoral access                          | 196 (76.0)        | 435 (72.1)            | 0.275          |
| Number of treated vessels               | 1.22 ± 0.45       | 1.15 ± 0.41           | 0.04           |
| DES                                     | 67 (27.0)         | 138 (23.6)            | 0.293          |
| Peri-procedural INR                     | 1.9 [1]           | 1.88 [1]              | 0.509          |
| Stent diameter (mm)                     | 3 [1]             | 3 [1]                 | 0.965          |
| Total stent length (mm)                 | 20 [18]           | 19 [14]               | 0.014          |
| Procedural success                      | 252 (97.7)        | 582 (96.5)            | 0.085          |
| Hemostasis                              |                   |                       |                |
| Manual compression                      | 112 (43.4)        | 249 (41.3)            | 0.765          |
| Compression device <sup>a</sup>         | 49 (19.0)         | 155 (25.7)            | 0.083          |
| Access-site closure device <sup>b</sup> | 82 (31.8)         | 165 (27.4)            | 0.154          |

Continuous variables are presented as mean  $\pm$  SD or median [interquartile range], whereas categorical variables are presented as frequency (percentage).

<sup>a</sup>FemoStop<sup>®</sup>, pneumatic compression device (Radi medical system, Sweden).

<sup>b</sup>Angioseal<sup>®</sup>, closure device (St. Jude medical, USA).

DES, drug-eluting stents; INR, international normalized ratio; IQR, inter-quartile range.

**Table 3** Prescription of antithrombotic medications at discharge in the two study subgroups

| Variable             | Anemia (N=258) | Non-anemic (N=603) | <i>p</i> value |
|----------------------|----------------|--------------------|----------------|
| Triple therapy       | 181 (70.2)     | 442 (73.3)         | 0.15           |
| DAPT                 | 58 (22.5)      | 100 (16.6)         |                |
| VKA plus clopidogrel | 15 (5.8)       | 51 (8.5)           |                |
| VKA plus aspirin     | 4 (1.6)        | 10 (1.7)           |                |

Variables are presented as frequency (percentage).

VKA indicates vitamin K antagonist; DAPT, dual antiplatelet therapy.

### Clinical outcome

Clinical outcomes at 12-month follow-up are presented in table 4 and figure 1.

The primary endpoint of MACCE was significantly more frequent in anemic patients than those without anemia (29.1 versus 19.4%, respectively,  $p=0.002$ ).

This difference was driven by higher rates of all-cause mortality, non-fatal MI, and definite/probable ST ( $p<0.05$  for all). Anemic patients had more BARC 3a bleeding events (7.0 versus 3.3%, respectively,  $p=0.028$ ). No difference was

1  
2  
3 seen in BARC 5 bleedings. There was a trend toward more total bleeding  
4  
5 events (25.2% in anemic versus 21.7% in controls,  $p=0.059$ ). (For detailed  
6  
7 information on bleeding events see [WebOnline](#) Table 2.) Total adverse events  
8  
9 occurred more frequently in anemic versus non-anemic patients (43.0 versus  
10  
11 31.5%, respectively,  $p=0.001$ ).  
12  
13  
14  
15  
16  
17  
18  
19  
20  
21  
22  
23  
24  
25  
26  
27  
28  
29  
30  
31  
32  
33  
34  
35  
36  
37  
38  
39  
40  
41  
42  
43  
44  
45  
46  
47  
48  
49  
50  
51  
52  
53  
54  
55  
56  
57  
58  
59  
60

**Table 4** Clinical outcome at 12-month follow-up in the two study subgroups

| <b>Endpoints</b>                    | <b>Anemia<br/>(N=258)</b> | <b>Non-anemic<br/>(N=603)</b> | <b>p value</b> |
|-------------------------------------|---------------------------|-------------------------------|----------------|
| MACCE                               | 75 (29.1)                 | 117 (19.4)                    | 0.002          |
| All-cause mortality                 | 48 (18.6)                 | 50 (8.3)                      | <0.001         |
| Stroke/TIA                          | 6 (2.3)                   | 17 (2.8)                      | 0.819          |
| Peripheral arterial embolism        | 2 (0.8)                   | 5 (0.8)                       | 1.00           |
| Non-fatal myocardial infarction     | 24 (9.3)                  | 27 (4.5)                      | 0.011          |
| Any revascularization               | 19 (7.4)                  | 51 (8.5)                      | 0.683          |
| Definite/probable stent thrombosis  | 10 (3.9)                  | 4 (0.7)                       | 0.002          |
| Total bleeding events               | 65 (25.2)                 | 131 (21.7)                    | 0.059          |
| Minor bleeding (BARC 2)             | 22 (8.5)                  | 48 (8.0)                      | 0.786          |
| Major bleeding (BARC 3a, 3b, 3c, 5) | 33 (12.8)                 | 56 (9.3)                      | 0.142          |
| Access site complications           | 25 (9.7)                  | 49 (8.1)                      | 0.51           |
| Pseudoaneurysm                      | 7 (2.7)                   | 18 (3.0)                      | 1.0            |
| Red blood cell transfusion          | 10 (3.9)                  | 5 (0.9)                       | 0.002          |
| Need for corrective surgery         | 5 (1.9)                   | 8 (1.3)                       | 0.25           |
| Prolonged hospitalization           | 15 (5.8)                  | 23 (3.8)                      | 0.21           |
| Total adverse events                | 111 (43.0)                | 190 (31.5)                    | 0.001          |

Variables are presented as frequency (percentage).

MACCE indicates major adverse cardiac and cerebrovascular events; TIA, transient ischemic attacks; BARC, Bleeding Academic Research Consortium.

1  
2  
3 The incidence of definite/probable stent thrombosis was significantly higher in  
4  
5 anemic versus non-anemic patients (3.9 versus 0.7%, respectively,  $p=0.002$ ).  
6  
7  
8 Patients who developed stent thrombosis more often presented with ACS than  
9  
10 those who did not (80.0 versus 56.6%, respectively,  $p=0.07$ ); however, the use  
11  
12 of triple therapy did not differ statistically between groups (60.0 versus 73.3%,  
13  
14 respectively,  $p=0.25$ ). Overall, nearly half (46.7%) of ST events occurred early  
15  
16 (<30 days). Acute (<24h after index PCI); early (<30 days) and late ST (>30  
17  
18 and < 365 days) were detected in 1 (0.4%) and 1 (0.2%) ( $p=0.51$ ); 4 (1.6%) vs.  
19  
20 2 (0.3%) ( $p=0.07$ ); and 6 (2.3%) vs. 2 (0.3%) ( $p=0.01$ ) in patients with anemia  
21  
22 vs. those without anemia, respectively.  
23  
24  
25  
26  
27  
28  
29  
30  
31

32 In univariate analysis age above 75, diabetes, congestive heart failure, anemia,  
33  
34 chronic renal impairment, ACS at presentation, and total stent length were  
35  
36 strongly correlated with both MACCE and all-cause mortality at 12-month  
37  
38 follow-up. In the Cox regression model including all the above variables,  
39  
40 independent predictors of all-cause mortality were anemia (HR 1.62, 95% CI  
41  
42 1.05 – 2.51,  $p=0.029$ ), ACS at presentation (HR 2.26, 95% CI 1.37 – 3.75,  
43  
44  $p=0.001$ ), chronic renal impairment (HR 2.35, 95% CI 1.52 – 3.65,  $p<0.001$ ),  
45  
46 and diabetes (HR 1.76, 95% CI 1.15 – 2.70,  $p=0.009$ ). In contrast, anemia as a  
47  
48 categorical variable was not an independent predictor of MACCE at 12-months  
49  
50 follow-up unlike age above 75 years (HR 1.7, 95%-CI 1.2-2.4,  $p=0.004$ ),  
51  
52  
53  
54  
55  
56  
57  
58  
59  
60



1  
2  
3 diabetes (HR 1.7, 95%-CI 1.2-2.3, p=0.002), ACS at presentation (HR 1.7,  
4  
5 95%-CI 1.2-2.3, p=0.003), and congestive heart failure (HR 1.5, 95%-CI 1.0-  
6  
7 2.1, p=0.03).

8  
9  
10 We performed the multivariate model also using haemoglobin as a continuous  
11  
12 variable. Independent predictors of all-cause mortality were pre-procedural  
13  
14 haemoglobin (HR 0.82, 95% CI 0.72 – 0.93, p=0.002), ACS at presentation  
15  
16 (HR 2.07, 95% CI 1.25 – 3.45, p=0.005), chronic renal impairment (HR 2.06,  
17  
18 95% CI 1.31 – 3.24, p=0.002), and diabetes (HR 1.75, 95% CI 1.14 – 2.70,  
19  
20 p=0.01) in a Cox regression model including age over 75 years, total stent  
21  
22 length and number of treated vessels as covariates. On the contrary to what  
23  
24 was found when assessing anemia as a categorical variable, haemoglobin as a  
25  
26 continuous variable predicted also MACCE. Independent predictors of  
27  
28 MACCE were pre-procedural haemoglobin (HR 0.89, 95% CI 0.81 – 0.98,  
29  
30 p=0.016), ACS at presentation (HR 1.55, 95% CI 1.10 – 2.18, p=0.012),  
31  
32 congestive heart failure (HR 1.45, 95% CI 1.03 – 2.04, p=0.035), age over 75  
33  
34 years (HR 1.77, 95%CI 1.27 – 2.45, p=0.001) and diabetes (HR 1.55, 95% CI  
35  
36 1.13 – 2.13, p=0.007) in a Cox regression model including also total stent  
37  
38 length, chronic renal impairment and number of treated vessels as covariates.  
39  
40  
41  
42  
43  
44  
45  
46  
47  
48  
49

50 When the anemic patients were analysed separately in the Cox  
51  
52 regression model, age over 75 years and ACS at presentation were identified as  
53  
54 independent predictors of MACCE at 12-months; and chronic renal  
55  
56  
57  
58  
59  
60

1  
2  
3 impairment, age over 75 years and ACS at presentation as independent  
4  
5 predictors of all-cause mortality  
6  
7

8  
9 Among 861 patients with available preprocedural measurement of  
10  
11 haemoglobin concentration, 26 (2.8%) had severe anemia (defined as  
12  
13 haemoglobin below 10 g/dl). In this subgroup, MACCE occurred in 12 (46.2%)  
14  
15 patients, 10 (38.5%) patients died, and 8 (30.8%) experienced a BARC 2-5  
16  
17 bleeding episode. At discharge, triple therapy was prescribed in 18 (69.2%)  
18  
19 patients, dual anti-platelet therapy in 8 (30.8%), and no patient was prescribed  
20  
21 vitamin K antagonists plus a single anti-platelet drug. Proton pump inhibitors  
22  
23 were prescribed at discharge in 18 (69.2%) patients, and one (3.8%) patient had  
24  
25 a history of gastrointestinal bleeding.  
26  
27  
28  
29  
30  
31  
32  
33  
34

## 35 **DISCUSSION**

36  
37 Our study is the first report on the impact of anemia on the long-term clinical  
38  
39 outcome of patients with AF undergoing PCI. The AFCAS registry represent a  
40  
41 real-life cohort of high-risk AF-patients requiring PCI. The results of the  
42  
43 current study showing that 30% of the patients were anemic confirm the  
44  
45 previous reports that anemia is a frequent finding in real-world patients with  
46  
47 AF referred for PCI.[6-9,14] Anemic patients in the AFCAS registry were older  
48  
49 with more comorbidities, and presented more often with ACS, compared with  
50  
51 non-anemic patients, as also reported in previous cohorts.[6,7,9,14].  
52  
53  
54  
55  
56  
57  
58  
59  
60

1  
2  
3  
4  
5  
6 Overall, the 12-month clinical outcome was worse in anemic patients. Anemia  
7  
8 remained an independent predictor of all-cause mortality in multivariate  
9  
10 analysis. The higher rate of all-cause mortality might be related to the higher-  
11  
12 risk profile in anemic patients, as well as the underlying disease causing  
13  
14 anemia. Furthermore, anemic patients had more frequent MACCE at 12  
15  
16 months, primarily driven by higher rates of all-cause mortality, and non-fatal  
17  
18 MI. However, anemia was not an independent predictor of MACCE. The higher  
19  
20 rate of non-fatal MI might be explained, at least in part, by the higher frequency  
21  
22 of ACS at presentation in anemic patients.  
23  
24  
25  
26  
27  
28  
29  
30  
31

32 The estimated thromboembolic risk of anemic patients according to CHADS<sub>2</sub>  
33  
34 score was higher. However, no excess in TIA or stroke was seen during the  
35  
36 follow-up and only a trend towards more bleeding was observed. This is  
37  
38 contradictory to previous studies which have reported a higher incidence of  
39  
40 cardiac and cerebrovascular thrombotic events at long-term follow-up in  
41  
42 anemic versus non-anemic patients in various patient cohorts referred for  
43  
44 PCI.[7,9,14-18] The relatively small number of complications in our patient  
45  
46 cohort might explain this difference.  
47  
48  
49  
50  
51  
52  
53  
54  
55  
56  
57  
58  
59  
60

1  
2  
3 The estimated bleeding risk according to the HAS-BLED score was higher in  
4  
5 anemic patients, but there was only a trend towards increased risk of major  
6  
7 bleeding. However, the results of the current study support the previous reports  
8  
9 on the increased bleeding risk associated with anemia in various patient groups  
10  
11 undergoing PCI.[8,9,19] Anemia may be a marker and consequence of an  
12  
13 underlying condition such as bleeding diathesis, occult gastrointestinal  
14  
15 bleeding, or malignancy that augments the bleeding risk. An interesting  
16  
17 observation is that neither the presence of anemia nor higher estimated bleeding  
18  
19 risk seemed to affect the clinician's choice of antithrombotic medications at  
20  
21 discharge. In view of our results, patients with anemia tolerated triple therapy  
22  
23 surprisingly well with only a trend towards increased bleeding.  
24  
25  
26  
27  
28  
29  
30  
31  
32  
33

34  
35 We observed that the rate of definite or probable stent thrombosis was  
36  
37 significantly higher in anemic versus non-anemic patients ( $p = 0.002$ ). ACS at  
38  
39 presentation may have contributed to the higher rate of stent thrombosis in  
40  
41 anemic patients, as patients with anemia more often presented with ACS versus  
42  
43 those without anemia. In addition, in individual cases the presence of anemia  
44  
45 may have influenced the choice of antithrombotic medication. Also, a bleeding  
46  
47 event could have lead to interruption of combination antithrombotic therapy  
48  
49 and thus to a higher risk of stent thrombosis. Consistent with our results,  
50  
51  
52  
53  
54  
55  
56 Pilgrim and co-workers, observed a higher rate of definite stent thrombosis at  
57  
58  
59  
60

1  
2  
3 4-year follow-up in anemic patients who underwent PCI with unrestricted use  
4  
5 of drug-eluting stents, compared with non-anemic ones.[14] Interestingly, in a  
6  
7 recent study, anemia was the only independent predictor of high residual  
8  
9 platelet reactivity on clopidogrel in a series of patients undergoing PCI.[20]  
10  
11 These observations warrant further studies to clarify the underlying  
12  
13 mechanisms.  
14  
15  
16  
17  
18  
19  
20

21  
22 The effect of anemia on the clinical outcome of PCI appears early during  
23  
24 hospitalization. Kaplan-Meier event-free survival curves in the current study  
25  
26 revealed that most of the thrombotic as well as bleeding events occurred early  
27  
28 (within 30 days) following the index PCI (Figure 1). This finding is in line with  
29  
30 previous reports.[6,8,9,15] In patients with coronary artery disease, anemia  
31  
32 may aggravate myocardial ischemia, and unveil significant coronary  
33  
34 obstruction. Cardiac output increases in patients with anemia in order to  
35  
36 maintain adequate oxygen delivery to the tissues. This increases heart rate and  
37  
38 induces myocardial hypertrophy, which in turn, increases myocardial oxygen  
39  
40 demand, and further exaggerates the myocardial oxygen demand/supply  
41  
42 imbalance.[21] On the other hand, patients with severe anemia receive more  
43  
44 frequent blood transfusion, which was reported to have an adverse impact on  
45  
46 survival after PCI.[22] Unfortunately, information on blood transfusions was  
47  
48 not available in our registry except for the in-hospital phase. More importantly,  
49  
50  
51  
52  
53  
54  
55  
56  
57  
58  
59  
60

1  
2  
3 anemia is frequently associated with severe underlying chronic diseases which  
4  
5 may compromise long-term survival. Of note is a recent report suggesting that  
6  
7 in patients who underwent PCI with drug-eluting stents, those in whom anemia  
8  
9 improved at follow-up had less MACCE at a median follow-up of 25 months,  
10  
11 compared with those with sustained anemia suggesting that a transient cause is  
12  
13 less detrimental than a long-standing state causing anemia, e.g. malignancy.[16]  
14  
15  
16  
17  
18  
19  
20

### 21 **Limitations of the study**

22  
23  
24 The current study has the inherent limitations of the observational study design,  
25  
26 including individual risk-based decision making in treatment choices, which  
27  
28 may introduce selection bias, even though we did not observe any difference  
29  
30 between the two study groups in the antithrombotic treatment prescribed at  
31  
32 discharge. Another possible confounder is the heterogeneity of the AF  
33  
34 population among the participating centers and some differences in the  
35  
36 periprocedural routines. Moreover, the aetiology of anemia was not  
37  
38 systematically investigated; yet, it is beyond the scope of the current study. The  
39  
40 strength of the study is the enrolment of consecutive patients with the only  
41  
42 exclusion criteria being unwillingness/inability to participate in the study. In  
43  
44 this sense the study population represents well real-world patients with AF  
45  
46 referred for PCI.  
47  
48  
49  
50  
51  
52  
53  
54  
55  
56  
57  
58  
59  
60

## Conclusion

Anemia was a frequent finding in patients with AF referred for PCI. ~~Anemic patients were older with more frequent comorbidities, and more often presented with ACS.~~ Anemia seems to be an independent risk factor for all-cause mortality during 12-month follow-up. Anemia is also associated with more MACCE, and a trend toward a higher rate of bleeding.

## ACKNOWLEDGMENTS

We thank our study coordinator Tuija Vasankari, RN, for her valuable input in data management.

## COMPETING INTERESTS

The authors declare no competing interests.

## FUNDING

This study was supported by grants from the Finnish Foundation for Cardiovascular Research, Helsinki, Finland.

**REFERENCES**

1. Rubboli A, Halperin JL, Airaksinen KE, et al. Antithrombotic therapy in patients treated with oral anticoagulation undergoing coronary artery stenting. An expert consensus document with focus on atrial fibrillation. *Ann Med* 2008;40(6):428-36.
2. Rubboli A, Colletta M, Valencia J, et al for the WARfarin, Coronary STENTing (WAR-STENT) Study Group. Periprocedural management and in-hospital outcome of patients with indication for oral anticoagulation undergoing coronary artery stenting. *J Interv Cardiol* 2009;22:390–397.
3. Lip GYH, Huber K, Andreotti F, et al. Antithrombotic management of atrial fibrillation patients presenting with acute coronary syndrome and/or undergoing coronary stenting: executive summary—a Consensus Document of the European Society of Cardiology Working Group on Thrombosis, endorsed by the European Heart Rhythm Association (EHRA) and the European Association of Percutaneous Cardiovascular Interventions (EAPCI). *Eur Heart J* 2010;31:1311-1318.
4. Faxon DP, Eikelboom JW, Berger PB, et al. Consensus Document: Antithrombotic therapy in patients with atrial fibrillation undergoing coronary stenting. A North-American perspective. *Thromb Haemost* 2011;106:522-84.



- 1  
2  
3 5. Rubboli A, Dewilde W, Huber K, et al. The management of patients on oral  
4  
5 anticoagulation undergoing coronary stent implantation: a survey among  
6  
7 interventional cardiologists from eight European countries. *J Interv Cardiol*  
8  
9 2012;25:163-9.  
10
- 11  
12  
13 6. McKechnie RS, Smith D, Montoye C, et al; Blue Cross Blue Shield of  
14  
15 Michigan Cardiovascular Consortium (BMC2). Prognostic implication of  
16  
17 anemia on in-hospital outcomes after percutaneous coronary intervention.  
18  
19 *Circulation* 2004;110(3):271-7.  
20  
21
- 22  
23  
24 7. Nikolsky E, Mehran R, Aymong ED, et al. Impact of anemia on outcomes of  
25  
26 patients undergoing percutaneous coronary interventions. *Am J Cardiol*  
27  
28 2004;94(8):1023-7.  
29  
30
- 31  
32  
33 8. Dündar C, Oduncu V, Erkol A, et al. In-hospital prognostic value of  
34  
35 hemoglobin levels on admission in patients with acute ST segment elevation  
36  
37 myocardial infarction undergoing primary angioplasty. *Clin Res Cardiol*  
38  
39 2012;101(1):37-44.  
40  
41
- 42  
43  
44 9. Ayhan E, Aycicek F, Uyarel H, et al. Patients with anemia on admission  
45  
46 who have undergone primary angioplasty for ST elevation myocardial  
47  
48 infarction: in-hospital and long-term clinical outcomes. *Coron Artery Dis*  
49  
50 2011;22(6):375-9.  
51  
52  
53  
54  
55  
56  
57  
58  
59  
60

- 1  
2  
3 10. Kiviniemi T, Karjalainen P, Rubboli A, et al. Thrombocytopenia in patients  
4  
5 with atrial fibrillation on oral anticoagulation undergoing percutaneous  
6  
7 coronary intervention. *Am J Cardiol* 2013 Aug 15;112(4):493-8.  
8  
9
- 10  
11 11. Schlitt A, Rubboli A, Lip GY, et al; for the AFCAS (Management of  
12  
13 patients with Atrial Fibrillation undergoing Coronary Artery Stenting Study  
14  
15 Group). The management of patients with atrial fibrillation undergoing  
16  
17 percutaneous coronary intervention with stent implantation: In-hospital-data  
18  
19 from the atrial fibrillation undergoing coronary artery stenting study.  
20  
21 *Catheter Cardiovasc Interv* 2013;82(7):E864-70  
22  
23
- 24  
25 12. Mehran R, Rao SV, Bhatt DL, et al. Standardized bleeding definitions for  
26  
27 cardiovascular clinical trials: a consensus report from the bleeding academic  
28  
29 research consortium, *Circulation* 2011;123:2736-2747.  
30  
31  
32
- 33  
34 13. Nutritional anaemias. Report of a WHO scientific group. *World Health*  
35  
36 *Organ Tech* 1968;405:5–32.  
37  
38
- 39  
40 14. Pilgrim T, Vetterli F, Kalesan B, et al. The impact of anemia on long-term  
41  
42 clinical outcome in patients undergoing revascularization with the  
43  
44 unrestricted use of drug-eluting stents. *Circ Cardiovasc Interv.*  
45  
46 2012;5(2):202-10.  
47  
48
- 49  
50 15. Lee PC, Kini AS, Ahsan C, et al. Anemia is an independent predictor of  
51  
52 mortality after percutaneous coronary intervention. *J Am Coll Cardiol*  
53  
54 2004;44(3):541-6.  
55  
56  
57  
58  
59  
60

- 1  
2  
3 16.Kim TH, Koh YS, Chang K, et al; CathOlic university of Korea –  
4  
5 percutAneous Coronary inTervention registry investigators. Improved  
6  
7 anemia is associated with favorable long-term clinical outcomes in patients  
8  
9 undergoing PCI. *Coron Artery Dis* 2012;23(6):391-9.  
10  
11  
12  
13 17.Kitai Y, Ozasa N, Morimoto T, et al; on behalf of the CREDO-Kyoto  
14  
15 registry investigators. Prognostic implications of anemia with or without  
16  
17 chronic kidney disease in patients undergoing elective percutaneous  
18  
19 coronary intervention. *Int J Cardiol* 2013;168(6):5221-8.  
20  
21  
22  
23 18.Hosseini SK, Ansari MJ, Lotfi Tokaldany M, et al. Association between  
24  
25 preprocedural hemoglobin level and 1-year outcome of elective  
26  
27 percutaneous coronary intervention. *J Cardiovasc Med.* 2013 Feb 15. [Epub  
28  
29 ahead of print]  
30  
31  
32  
33 19.Manzano-Fernández S, Pastor FJ, Marín F, et al. Increased major bleeding  
34  
35 complications related to triple antithrombotic therapy usage in patients with  
36  
37 atrial fibrillation undergoing percutaneous coronary artery stenting. *Chest*  
38  
39 2008;134(3):559-67.  
40  
41  
42  
43 20.Toma C, Zahr F, Moguilanski D, et al. Impact of anemia on platelet  
44  
45 response to clopidogrel in patients undergoing percutaneous coronary  
46  
47 stenting. *Am J Cardiol* 2012;109(8):1148-53.  
48  
49  
50  
51  
52  
53  
54  
55  
56  
57  
58  
59  
60

1  
2  
3 21.Foley RN, Parfrey PS, Hamett JD, et al. The impact of anemia on  
4  
5 cardiomyopathy, morbidity, and mortality in end-stage renal disease. Am J  
6  
7 Kidney Dis 1996;28:53– 61.  
8  
9

10  
11 22.Maluenda G, Lemesle G, Ben-Dor I, et al. Value of blood transfusion in  
12  
13 patients with a blood hematocrit of 24% to 30% after percutaneous coronary  
14  
15 intervention. Am J Cardiol 2009;104:1069 –1073.  
16  
17  
18  
19  
20  
21  
22  
23  
24  
25  
26  
27  
28  
29  
30  
31  
32  
33  
34  
35  
36  
37  
38  
39  
40  
41  
42  
43  
44  
45  
46  
47  
48  
49  
50  
51  
52  
53  
54  
55  
56  
57  
58  
59  
60

**FIGURE LEGENDS**

Figure 1 Kaplan-Meier survival curves for the occurrence of adverse events in anemic (dotted lines) versus non-anemic (solid line) patients at 2-month follow-up: all-cause mortality (a), MACCE free survival (b) and bleeding event free survival (c)

For peer review only

1  
2  
3  
4  
5  
6  
7  
8  
9  
10  
11  
12  
13  
14  
15  
16  
17  
18  
19  
20  
21  
22  
23  
24  
25  
26  
27  
28  
29  
30  
31  
32  
33  
34  
35  
36  
37  
38  
39  
40  
41  
42  
43  
44  
45  
46  
47  
48  
49  
50  
51  
52  
53  
54  
55  
56  
57  
58  
59  
60

For peer review only

1  
2  
3  
4  
5  
6  
7  
8  
9  
10  
11  
12  
13  
14  
15  
16  
17  
18  
19  
20  
21  
22  
23  
24  
25  
26  
27  
28  
29  
30  
31  
32  
33  
34  
35  
36  
37  
38  
39  
40  
41  
42  
43  
44  
45  
46  
47  
48  
49  
50  
51  
52  
53  
54  
55  
56  
57  
58  
59  
60

For peer review only

1  
2  
3  
4  
5  
6  
7  
8  
9  
10  
11  
12  
13  
14  
15  
16  
17  
18  
19  
20  
21  
22  
23  
24  
25  
26  
27  
28  
29  
30  
31  
32  
33  
34  
35  
36  
37  
38  
39  
40  
41  
42  
43  
44  
45  
46  
47  
48  
49  
50  
51  
52  
53  
54  
55  
56  
57  
58  
59  
60

For peer review only



1  
2  
3  
4  
5  
6  
7  
8  
9  
10  
11  
12  
13  
14  
15  
16  
17  
18  
19  
20  
21  
22  
23  
24  
25  
26  
27  
28  
29  
30  
31  
32  
33  
34  
35  
36  
37  
38  
39  
40  
41  
42  
43  
44  
45  
46  
47  
48  
49  
50  
51  
52  
53  
54  
55  
56  
57  
58  
59  
60

For peer review only

STROBE Statement—Checklist of items that should be included in reports of *cohort studies*

|                              | Item No | Recommendation                                                                                                                                                                                                                                                                                                                  |
|------------------------------|---------|---------------------------------------------------------------------------------------------------------------------------------------------------------------------------------------------------------------------------------------------------------------------------------------------------------------------------------|
| <b>Title and abstract</b>    | 1       | (a) Indicate the study's design with a commonly used term in the title or the abstract ok<br>(b) Provide in the abstract an informative and balanced summary of what was done and what was found ok                                                                                                                             |
| <b>Introduction</b>          |         |                                                                                                                                                                                                                                                                                                                                 |
| Background/rationale         | 2       | Explain the scientific background and rationale for the investigation being reported ok                                                                                                                                                                                                                                         |
| Objectives                   | 3       | State specific objectives, including any prespecified hypotheses ok                                                                                                                                                                                                                                                             |
| <b>Methods</b>               |         |                                                                                                                                                                                                                                                                                                                                 |
| Study design                 | 4       | Present key elements of study design early in the paper ok                                                                                                                                                                                                                                                                      |
| Setting                      | 5       | Describe the setting, locations, and relevant dates, including periods of recruitment, exposure, follow-up, and data collection ok                                                                                                                                                                                              |
| Participants                 | 6       | (a) Give the eligibility criteria, and the sources and methods of selection of participants. Describe methods of follow-up ok<br>(b) For matched studies, give matching criteria and number of exposed and unexposed                                                                                                            |
| Variables                    | 7       | Clearly define all outcomes, exposures, predictors, potential confounders, and effect modifiers. Give diagnostic criteria, if applicable ok                                                                                                                                                                                     |
| Data sources/<br>measurement | 8*      | For each variable of interest, give sources of data and details of methods of assessment (measurement). Describe comparability of assessment methods if there is more than one group                                                                                                                                            |
| Bias                         | 9       | Describe any efforts to address potential sources of bias                                                                                                                                                                                                                                                                       |
| Study size                   | 10      | Explain how the study size was arrived at                                                                                                                                                                                                                                                                                       |
| Quantitative variables       | 11      | Explain how quantitative variables were handled in the analyses. If applicable, describe which groupings were chosen and why ok                                                                                                                                                                                                 |
| Statistical methods          | 12      | (a) Describe all statistical methods, including those used to control for confounding ok<br>(b) Describe any methods used to examine subgroups and interactions ok<br>(c) Explain how missing data were addressed ok<br>(d) If applicable, explain how loss to follow-up was addressed<br>(e) Describe any sensitivity analyses |
| <b>Results</b>               |         |                                                                                                                                                                                                                                                                                                                                 |
| Participants                 | 13*     | (a) Report numbers of individuals at each stage of study—eg numbers potentially eligible, examined for eligibility, confirmed eligible, included in the study, completing follow-up, and analysed ok<br>(b) Give reasons for non-participation at each stage<br>(c) Consider use of a flow diagram                              |
| Descriptive data             | 14*     | (a) Give characteristics of study participants (eg demographic, clinical, social) and information on exposures and potential confounders ok<br>(b) Indicate number of participants with missing data for each variable of interest ok<br>(c) Summarise follow-up time (eg, average and total amount) ok                         |
| Outcome data                 | 15*     | Report numbers of outcome events or summary measures over time ok                                                                                                                                                                                                                                                               |
| Main results                 | 16      | (a) Give unadjusted estimates and, if applicable, confounder-adjusted estimates and their precision (eg, 95% confidence interval). Make clear which confounders were adjusted for and why they were included ok                                                                                                                 |

|                          |    |                                                                                                                                                                               |
|--------------------------|----|-------------------------------------------------------------------------------------------------------------------------------------------------------------------------------|
|                          |    | (b) Report category boundaries when continuous variables were categorized ok                                                                                                  |
|                          |    | (c) If relevant, consider translating estimates of relative risk into absolute risk for a meaningful time period                                                              |
| Other analyses           | 17 | Report other analyses done—eg analyses of subgroups and interactions, and sensitivity analyses ok                                                                             |
| <b>Discussion</b>        |    |                                                                                                                                                                               |
| Key results              | 18 | Summarise key results with reference to study objectives ok                                                                                                                   |
| Limitations              | 19 | Discuss limitations of the study, taking into account sources of potential bias or imprecision. Discuss both direction and magnitude of any potential bias ok                 |
| Interpretation           | 20 | Give a cautious overall interpretation of results considering objectives, limitations, multiplicity of analyses, results from similar studies, and other relevant evidence ok |
| Generalisability         | 21 | Discuss the generalisability (external validity) of the study results ok                                                                                                      |
| <b>Other information</b> |    |                                                                                                                                                                               |
| Funding                  | 22 | Give the source of funding and the role of the funders for the present study and, if applicable, for the original study on which the present article is based ok              |

\*Give information separately for exposed and unexposed groups.

**Note:** An Explanation and Elaboration article discusses each checklist item and gives methodological background and published examples of transparent reporting. The STROBE checklist is best used in conjunction with this article (freely available on the Web sites of PLoS Medicine at <http://www.plosmedicine.org/>, Annals of Internal Medicine at <http://www.annals.org/>, and Epidemiology at <http://www.epidem.com/>). Information on the STROBE Initiative is available at <http://www.strobe-statement.org>.
